# Supplementary material for: One-pot relay reduction–isomerization of β-trifluoromethylated-α,β-unsaturated ketones to chiral β-trifluoromethylated saturated ketones over combined catalysts in aqueous medium
Source: Royal Society of Chemistry journal article supplement (doi:10.1039/c5gc00479a), 2015-01-01

Supporting Information for

**One-pot Relay Reduction-Isomerization of  $\beta$ -Trifluoromethylated- $\alpha,\beta$ -Unsaturated Ketones to chiral  $\beta$ -Trifluoromethylated Saturated Ketones Over Combined Catalysts in Aqueous Medium**

Xuelin Xia, Meng Wu, Ronghua Jin, Tanyu Cheng, Guohua Liu\*

Key Laboratory of Resource Chemistry of Ministry of Education, Shanghai Key Laboratory of Rare Earth Functional Materials, Shanghai Normal University, No.100 Guilin Rd, Shanghai 200241, P. R. China

|              | <b>Content</b>                                                                                                                                                                  | <b>Page</b> |
|--------------|---------------------------------------------------------------------------------------------------------------------------------------------------------------------------------|-------------|
| Experimental | General, preparation and reaction                                                                                                                                               | S2          |
| Figure S1    | FT-IR spectra of <b>2</b> and catalyst <b>3</b> .                                                                                                                               | S3          |
| Figure S2    | XPS spectrum of $[\text{RuCl}_2(p\text{-cymene})]_2$                                                                                                                            | S3          |
| Figure S3    | TEM images of catalyst <b>3</b> viewed along [100] (a) and [001] (b) directions.                                                                                                | S4          |
| Figure S4    | One-pot enantioselective reduction-isomerization of $\beta$ -trifluoromethylated- $\alpha,\beta$ -unsaturated ketones to chiral $\beta$ -trifluoromethylated saturated ketones. | S5          |
| Figure S5    | Enantioselective reductions of $\beta$ -trifluoromethylated- $\alpha,\beta$ -unsaturated ketones to chiral $\beta$ -trifluoromethylated alcohols.                               | S23         |
| Figure S6    | Reusability of catalyst <b>3</b> for enantioselective reduction of 4,4,4-trifluoro-1,3-diphenylbut-2-enone to ( <i>R</i> )-4,4,4-trifluoro-1,3-diphenylbut-2-enol               | S41         |
| Figure S7    | $^1\text{H-NMR}$ , $^{13}\text{C-NMR}$ and GC-MS of all chiral products.                                                                                                        | S43         |

## Experimental

### 1. General

All experiments, which are sensitive to moisture or air, were carried out under an Ar atmosphere using the standard Schlenk techniques. (*R,R*)-1,2-diphenylenediamine,  $[\text{RuCl}_2(p\text{-Cymene})]_2$ , 1,2-bis(triethoxysilyl)ethane, surfactant P123  $(\text{CH}_2\text{-CH}_2\text{O})_{20}(\text{CH}_2(\text{CH}_3)\text{CH}_2\text{O})_{70}(\text{CH}_2\text{CH}_2\text{O})_{20}$  and tetraethoxysilane (TEOS) were purchased from Sigma-Aldrich Company Ltd. Compounds (*R,R*)-4-(trimethoxysilyl)ethylphenylsulfonyl-1,2-diphenylethylenediamine was synthesized according to the reported literatures [*J. Mater. Chem.* **2010**, *20*, 1970]

**2. Preparation of ArDPEN-PMO (2).** In a typical synthesis, 2.0 g of structure-directing agent, pluronic P123, was fully dissolved in a mixture of 80 mL hydrochloric acid (0.2 N) and 6.0 g KCl and the mixture was stirred at room temperature for 1.0 h. Then, 3.36 mL (9.10 mmol) of 1,2-bis(triethoxysilyl)ethane was added as the silica precursor at 40 °C. After pre-hydrolysis period of 40 min., 0.24 g (0.48 mmol) of (*R,R*)-DPEN-SO<sub>2</sub>Ph(CH<sub>2</sub>)<sub>2</sub>Si(OMe)<sub>3</sub> was added. The reaction mixture was stirred at 40 °C for 24 h and aged at 100 °C for 24 h. The resulting solid was filtered and rinsed with excess ethanol before being dried overnight on a filter. The surfactant template was removed by refluxing in acidic ethanol (400 mL per gram) for 24 h. The solid was filtered and rinsed with ethanol again, and dried at 60 °C under reduced pressure overnight to afford **2** (1.36 g) in the form of a white powder. IR (KBr) cm<sup>-1</sup>: 3443.5 (s), 2978.5 (w), 2928.8 (w), 1627.2 (m), 1460.2 (w), 1416.5 (w), 1382.7 (w), 1273.4 (m), 1164.1 (s), 1096.5 (s), 1028.9 (s), 919.7 (m), 766.7 (m), 699.1 (m), 438.8 (m); <sup>13</sup>C CP MAS NMR (161.9 MHz): 150.0, 137.5, 128.7 (C<sub>of</sub> Ph and Ar), 76.1–69.2 (C<sub>of</sub> -NCHPh-), 59.4 (O-CH<sub>2</sub>CH<sub>3</sub>), 28.8 (C<sub>of</sub> -CH<sub>2</sub>Ar), 16.3 (O-CH<sub>2</sub>CH<sub>3</sub>), 5.2 (C<sub>of</sub> -CH<sub>2</sub>Si) ppm; <sup>29</sup>Si MAS/NMR (79.4 MHz): T<sup>1</sup> (δ = -49.1 ppm), T<sup>2</sup> (δ = -57.6 ppm), T<sup>3</sup> (δ = -65.0 ppm).

**3. General procedure for the reuse experiments using 4,4,4-trifluoro-1,3-diphenylbut-2-enone as a substrate.**

The catalyst **3** (291.0 mg, 0.030 mmol of Ru based on ICP analysis), 4,4,4-trifluoro-1,3-diphenylbut-2-enone (1.50 mmol), HCO<sub>2</sub>Na (2.04 g, 30.0 mmol), 20.0 mL of water were added sequentially to a 50.0 mL round-bottom flask. The mixture was then stirred at room temperature (20 °C) for 17 h. After completion of the reaction, the catalyst was separated by centrifugation (10,000 rpm). The collected solids were transferred to a fresh 50.0 mL round-bottom flask and 4,4,4-trifluoro-1,3-diphenylbut-2-enone (1.50 mmol), HCO<sub>2</sub>Na (2.04 g, 30.0 mmol) and 20.0 mL of water were added again for next recycle. The aqueous solution was extracted with ethyl ether (3 × 3.0 mL). The combined ethyl ether extracts were washed with NaHCO<sub>3</sub> and brine, and then dehydrated with Na<sub>2</sub>SO<sub>4</sub>. After evaporation of ethyl ether, the residue was purified by silica gel flash column chromatography to afford the desired products.

**Figure S1.** FT-IR spectra of **2** and catalyst **3**.

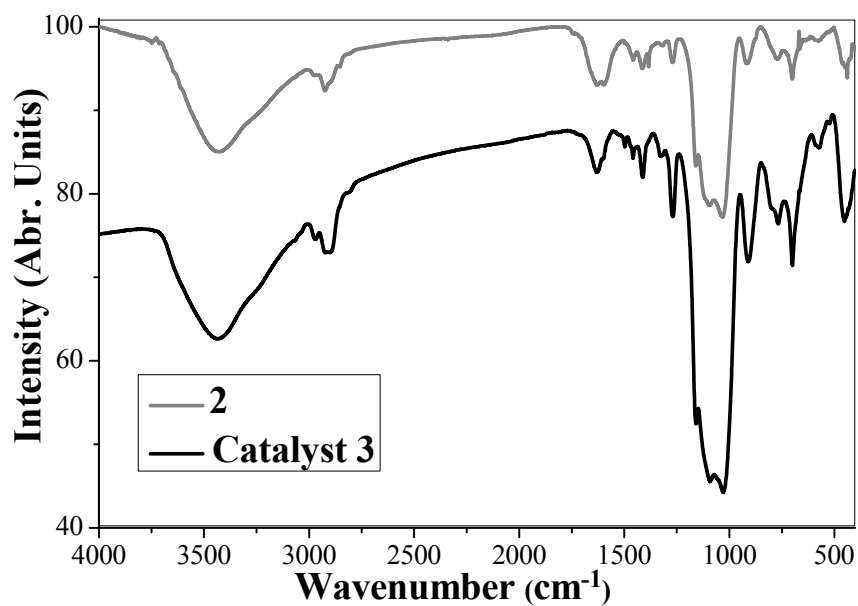

**Figure S2.** XPS spectrum of [RuCl<sub>2</sub>(*p*-cymene)]<sub>2</sub>.

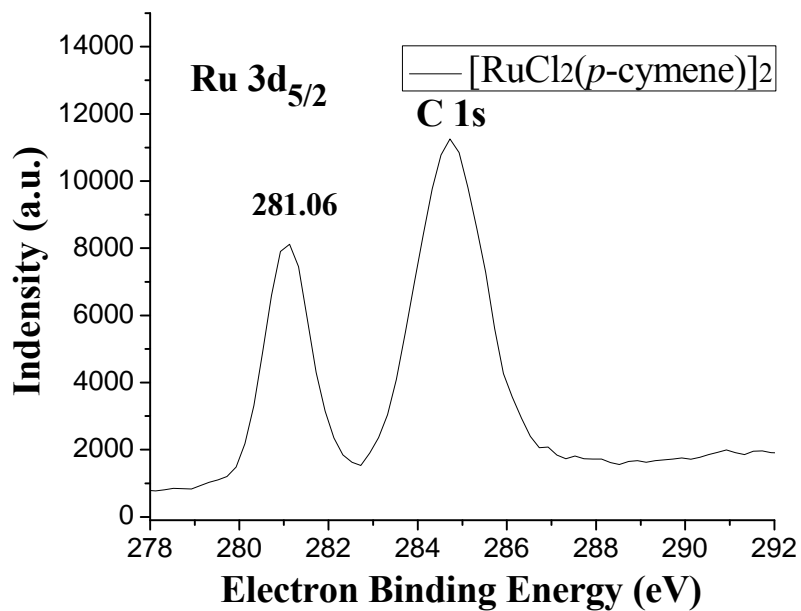

**Figure S3.** TEM images of catalyst **3** viewed along [100] (a) and [001] (b) directions.

(a) [100] direction.

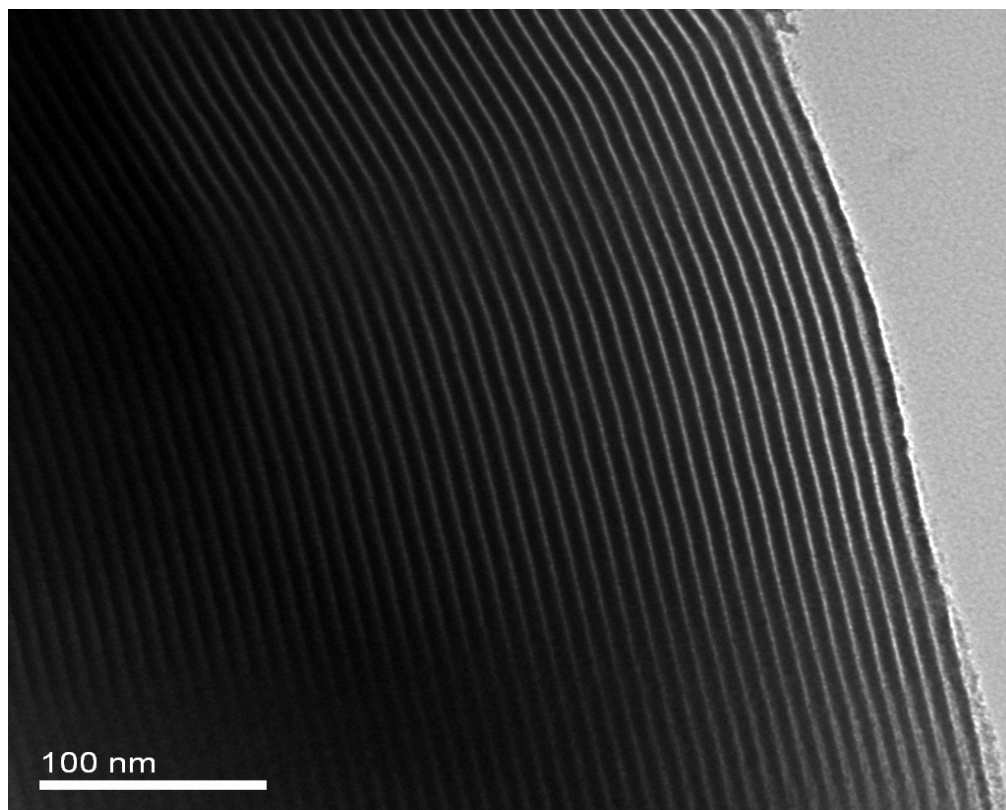

(b) [001] direction.

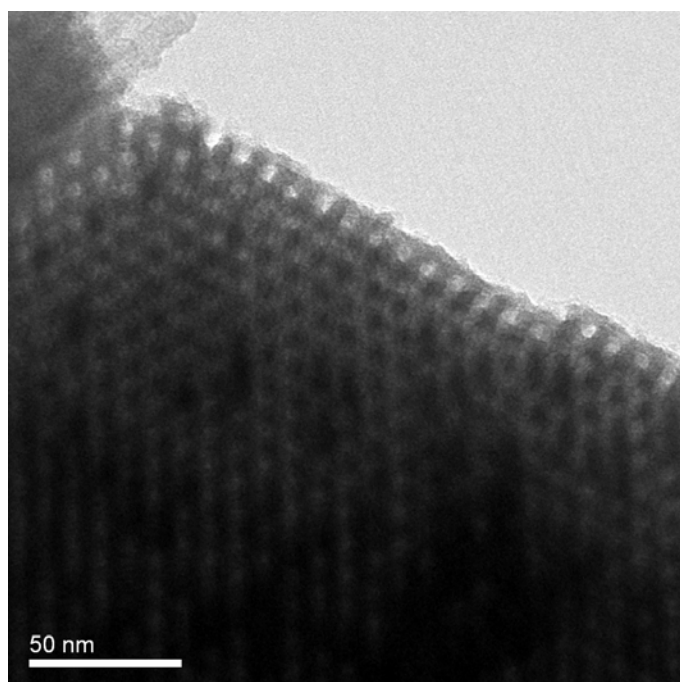

**Figure S4.** One-pot enantioselective reduction-isomerization of  $\beta$ -trifluoromethylated- $\alpha,\beta$ -unsaturated ketones to chiral  $\beta$ -trifluoromethylated saturated ketones. [The products were analyzed by a HPLC with a UV-Vis detector using a Daicel OD-H or OJ-H chiralcel column ( $\Phi 0.46 \times 25$  cm)].

**Translation of Chinese to English is as follows:**

| Peak | RetTime [min] | Area     | Area%   | Height  | Height% |
|------|---------------|----------|---------|---------|---------|
| 1    | 18.474        | 235619.9 | 92.0500 | 13827.2 | 79.0685 |
| 2    | 19.395        | 9109.7   | 3.5589  | 1042.4  | 5.9606  |

**6a:** (*R*)-4,4,4-trifluoro-1,3-diphenylbutan-1-one (HPLC: Chiralcel OD-H, detected at 254 nm, eluent: n-hexane/2-propanol = 95/5, flow rate = 1.0 mL/min, 25 °C).

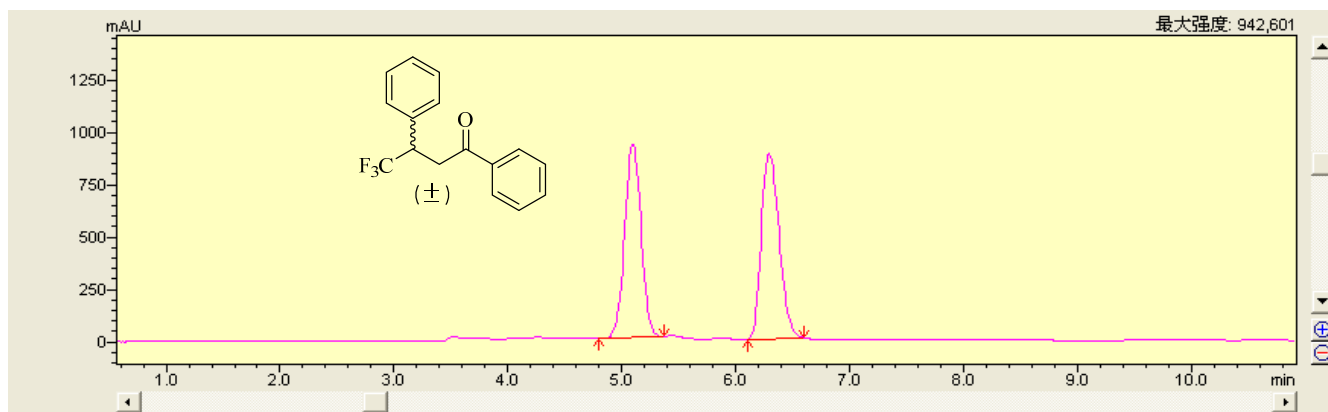

化合物表视图

| ID# | 名称      | 保留时间  | 峰# | 面积      | 高度     | 面积%     |
|-----|---------|-------|----|---------|--------|---------|
| 1   | RT5.090 | 5.090 | 1  | 9210739 | 920946 | 48.8763 |
| 2   | RT6.287 | 6.287 | 2  | 9634261 | 882735 | 51.1237 |

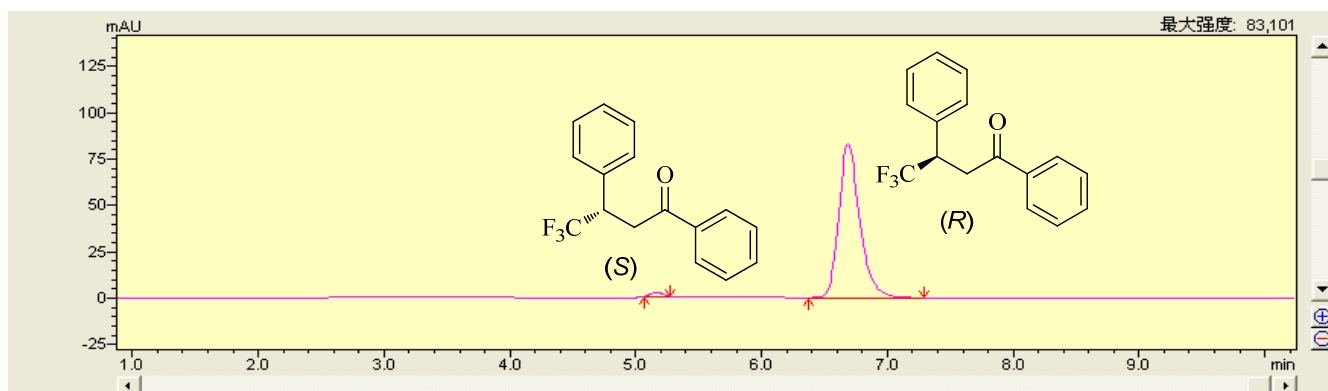

化合物表视图

| ID# | 名称      | 保留时间  | 峰# | 面积     | 高度    | 面积%     |
|-----|---------|-------|----|--------|-------|---------|
| 1   | RT5.159 | 5.159 | 1  | 13885  | 2035  | 1.4237  |
| 2   | RT6.683 | 6.683 | 2  | 961425 | 82845 | 98.5763 |

**6b:** (R)-4,4,4-trifluoro-3-(4-fluorophenyl)-1-phenylbutan-1-one (HPLC: Chiracel OD-H, detected at 254 nm, eluent: n-hexane/2-propanol = 95/5, flow rate = 1.0 mL/min, 25 °C).

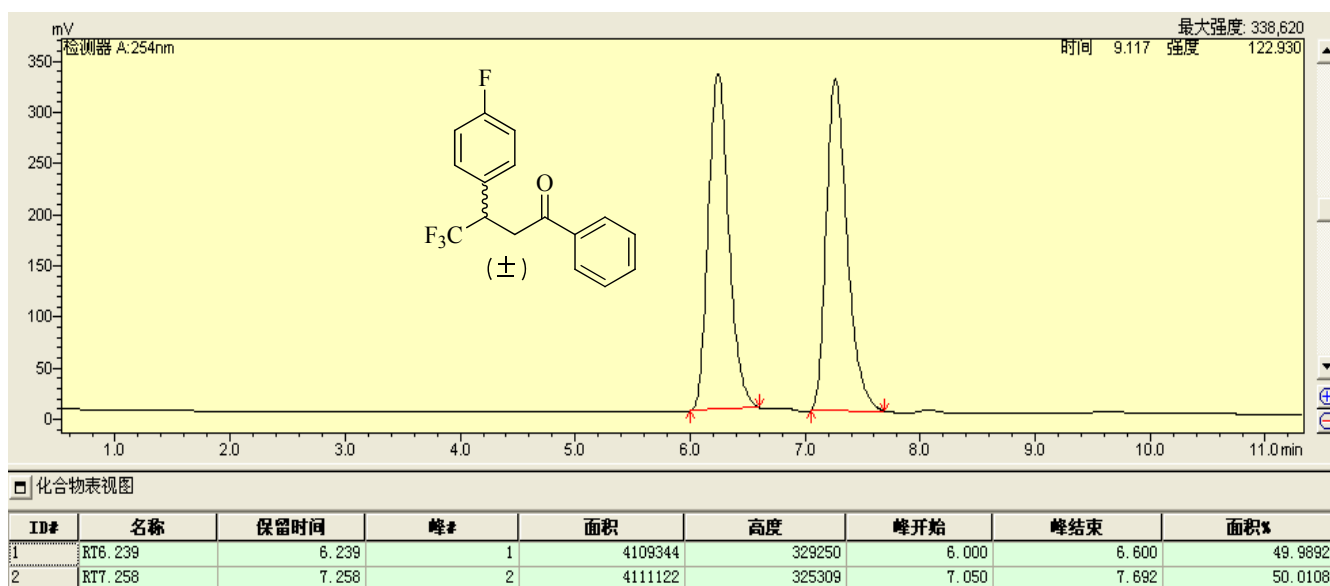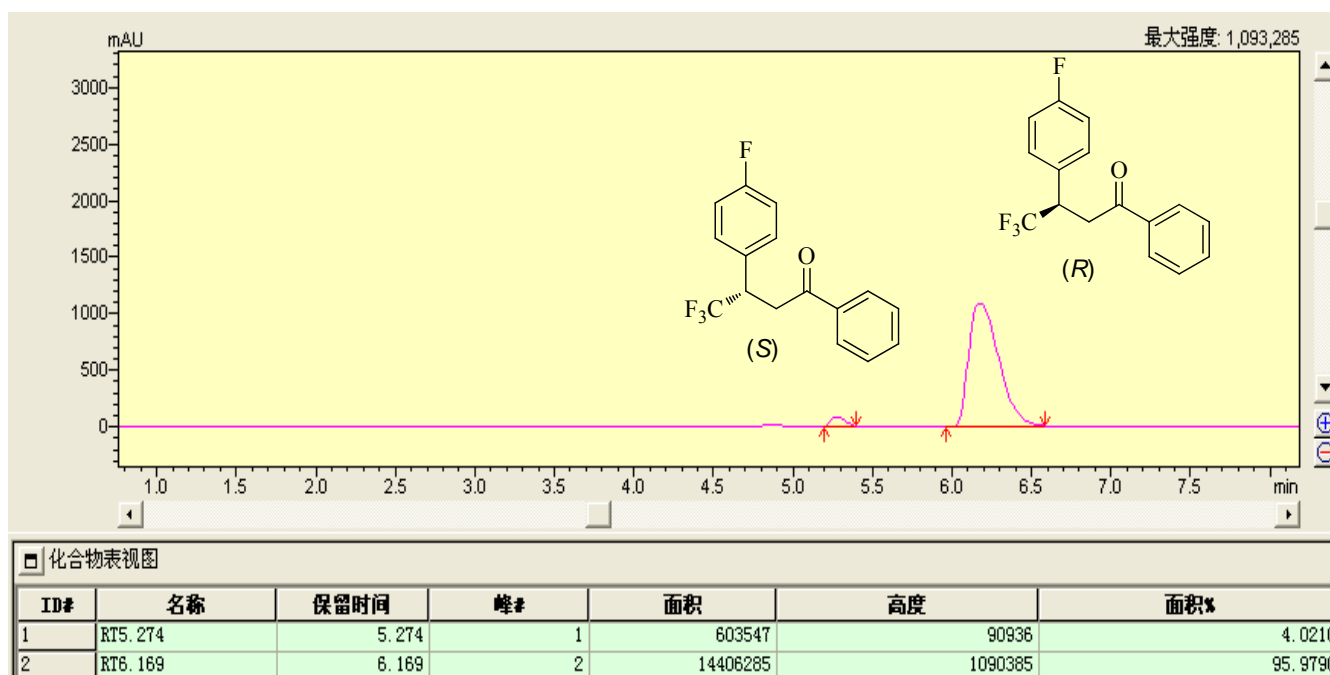

**6c:** (*R*)-3-(4-chlorophenyl)-4,4,4-trifluoro-1-phenylbutan-1-one (HPLC: Chiralcel OD-H, detected at 254 nm, eluent: n-hexane/2-propanol = 95/5, flow rate = 1.0 mL/min, 25 °C).

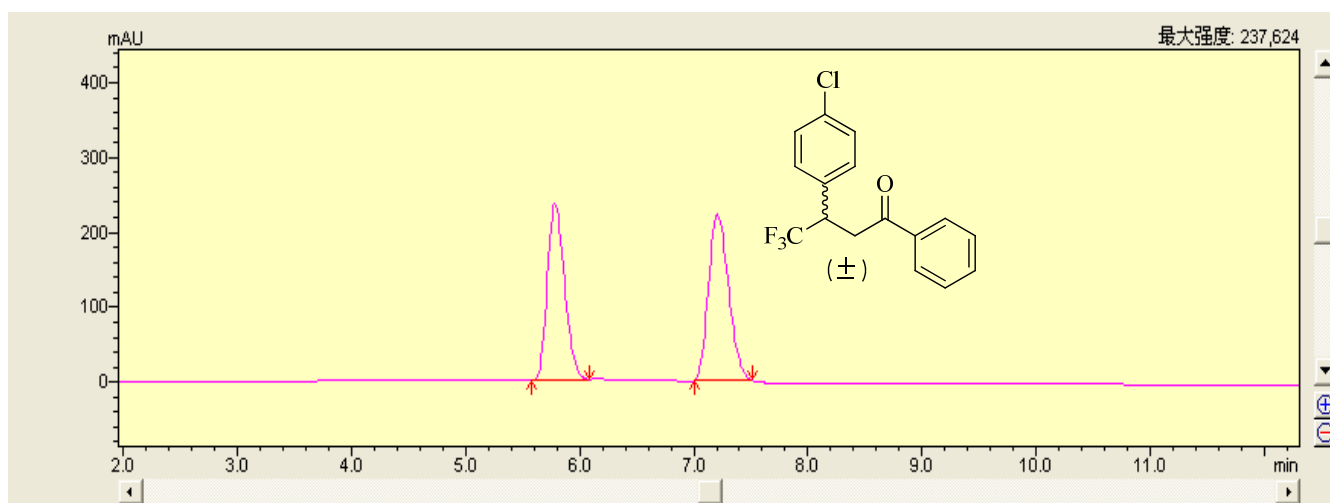

化合物表视图

| ID# | 名称      | 保留时间  | 峰# | 面积      | 高度     | 面积%     |
|-----|---------|-------|----|---------|--------|---------|
| 1   | RT5.779 | 5.779 | 1  | 2466855 | 234754 | 47.4753 |
| 2   | RT7.201 | 7.201 | 2  | 2729226 | 221803 | 52.5247 |

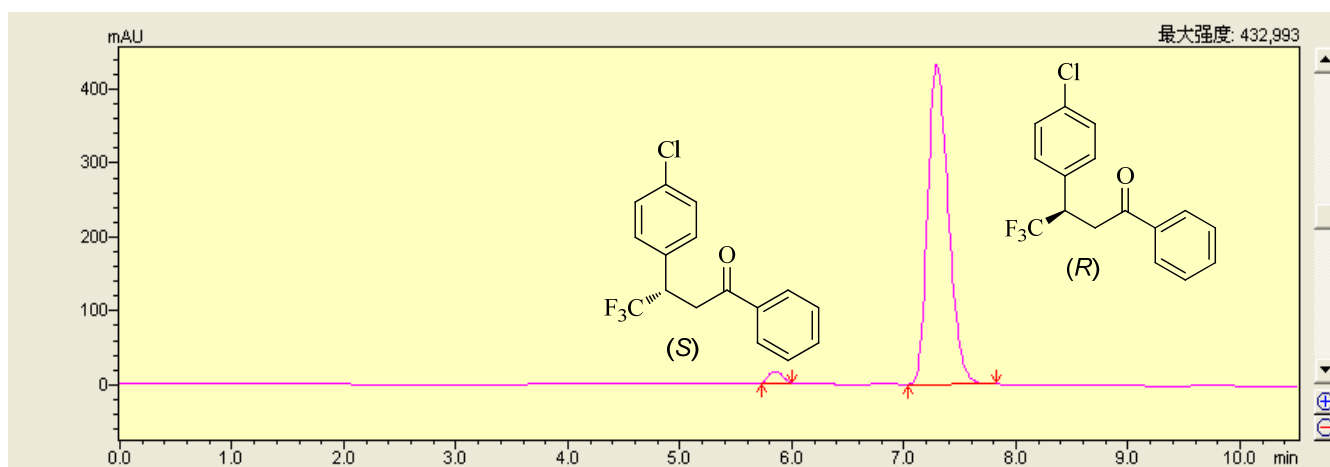

化合物表视图

| ID# | 名称      | 保留时间  | 峰# | 面积      | 高度     | 面积%     |
|-----|---------|-------|----|---------|--------|---------|
| 1   | RT5.843 | 5.843 | 1  | 140278  | 16126  | 2.4569  |
| 2   | RT7.285 | 7.285 | 2  | 5569253 | 432370 | 97.5431 |

**6d:** (*R*)-3-(4-bromophenyl)-4,4,4-trifluoro-1-phenylbutan-1-one (HPLC: Chiralcel OD-H, detected at 254 nm, eluent: n-hexane/2-propanol = 95/5, flow rate = 1.0 mL/min, 25 °C).

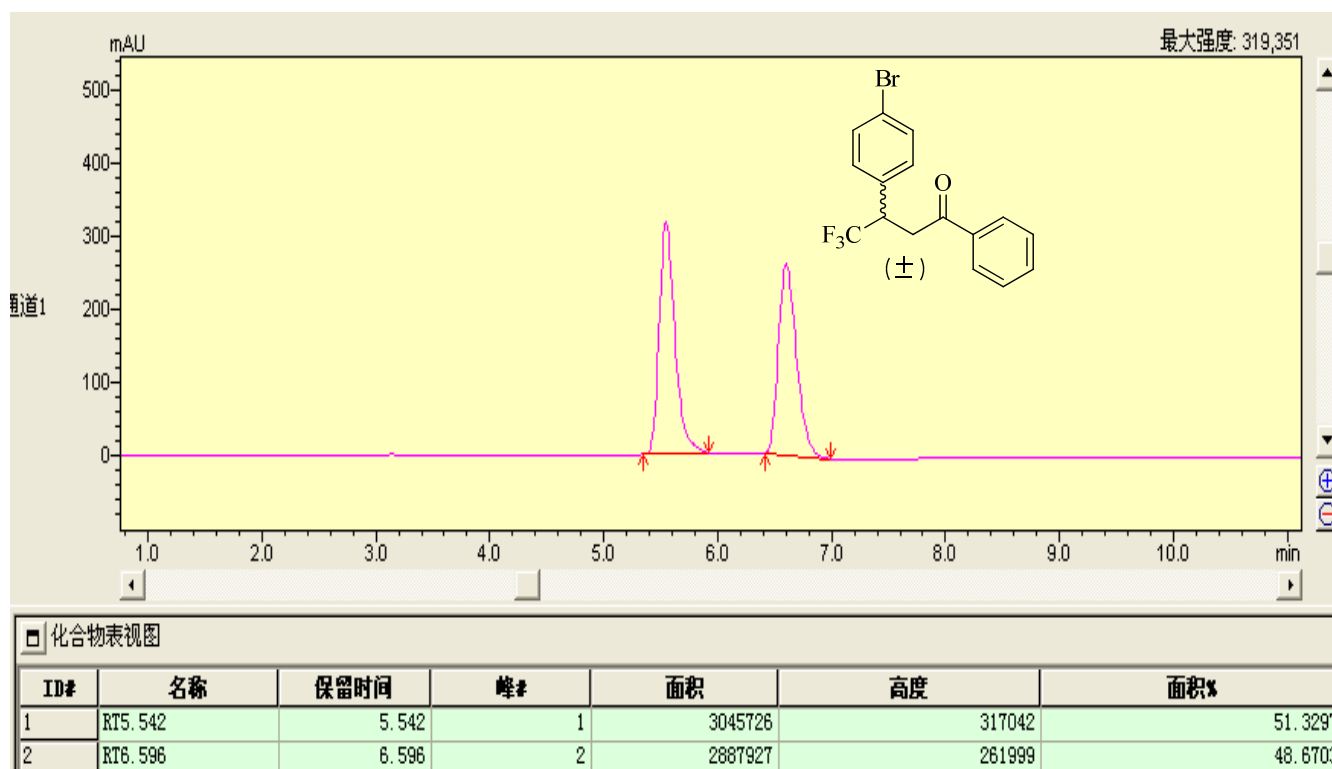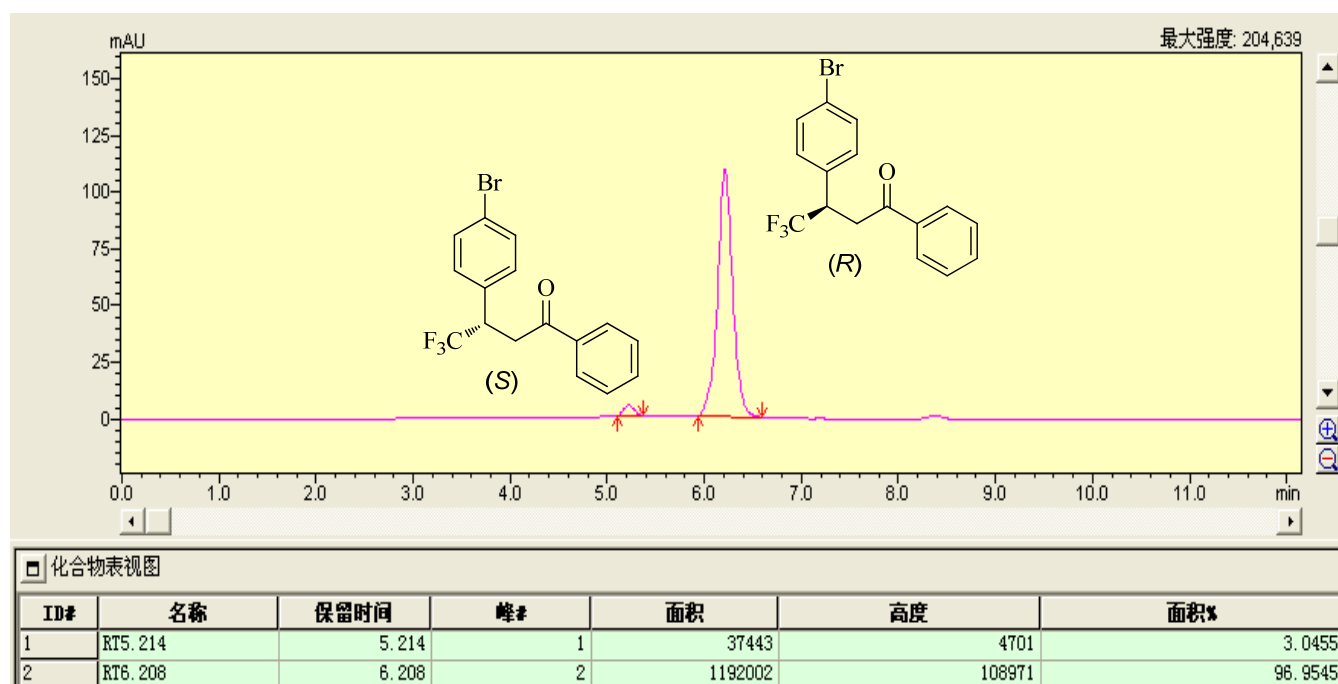



**6e: (R)-3-(3-bromophenyl)-4,4,4-trifluoro-1-phenylbutan-1-one (4e):** (HPLC: Chiralcel OD-H, detected at 254 nm, eluent: n-hexane/2-propanol = 95/5, flow rate = 1.0 mL/min, 25 °C).

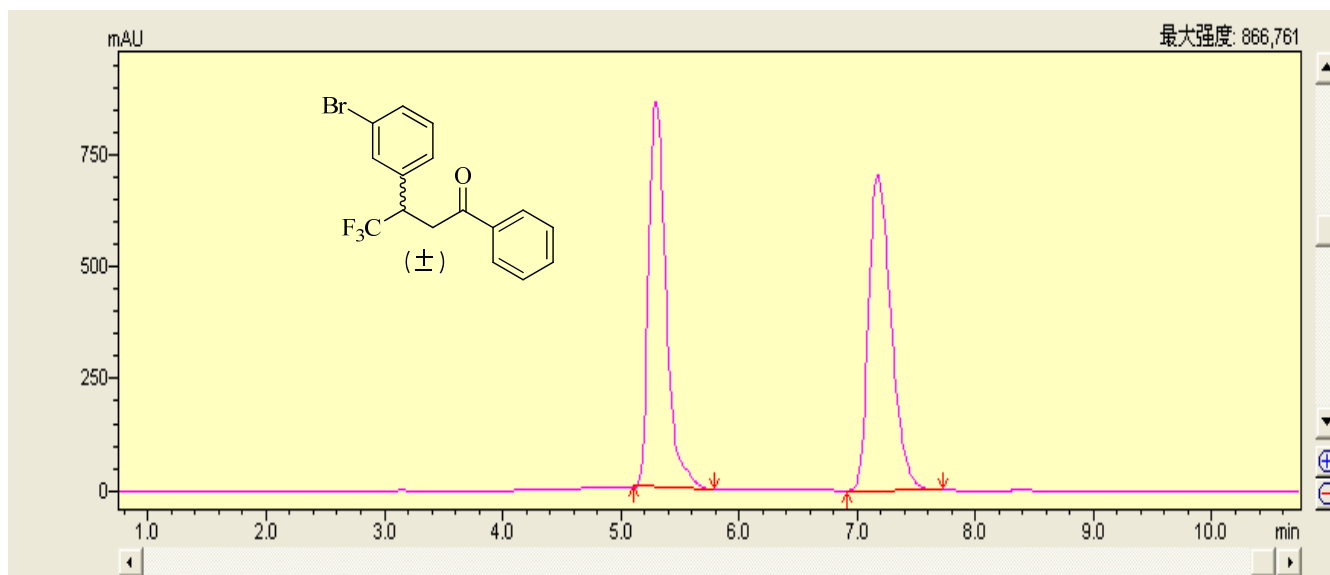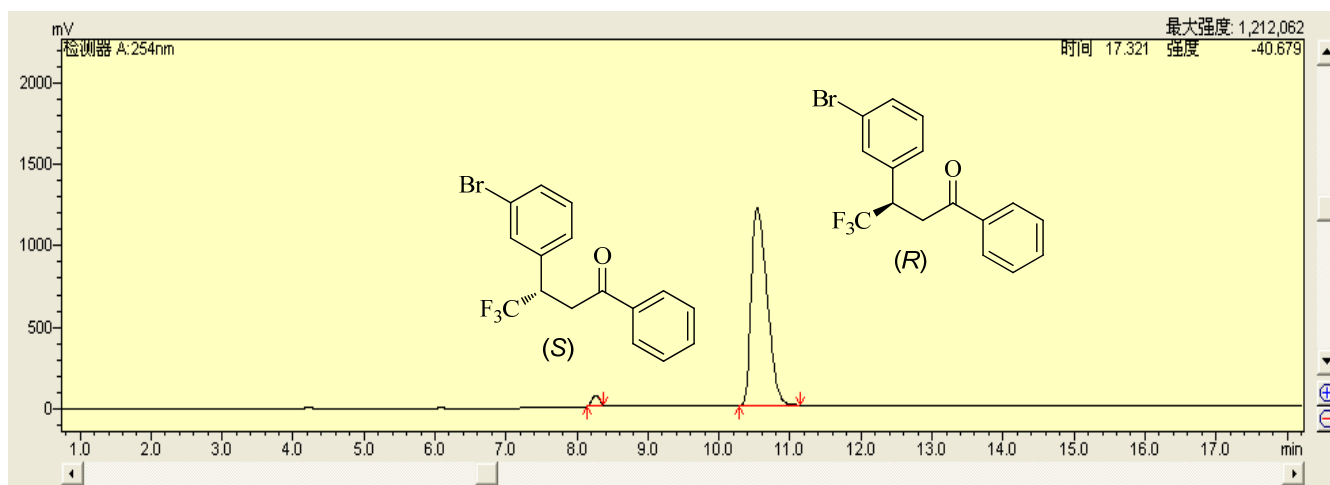

**6f:** (R)-4,4,4-trifluoro-1-phenyl-3-(4-(trifluoromethyl)phenyl)butan-1-one (HPLC: Chiracel OD-H, detected at 254 nm, eluent: n-hexane/2-propanol = 95/5, flow rate = 1.0 mL/min, 25 °C).

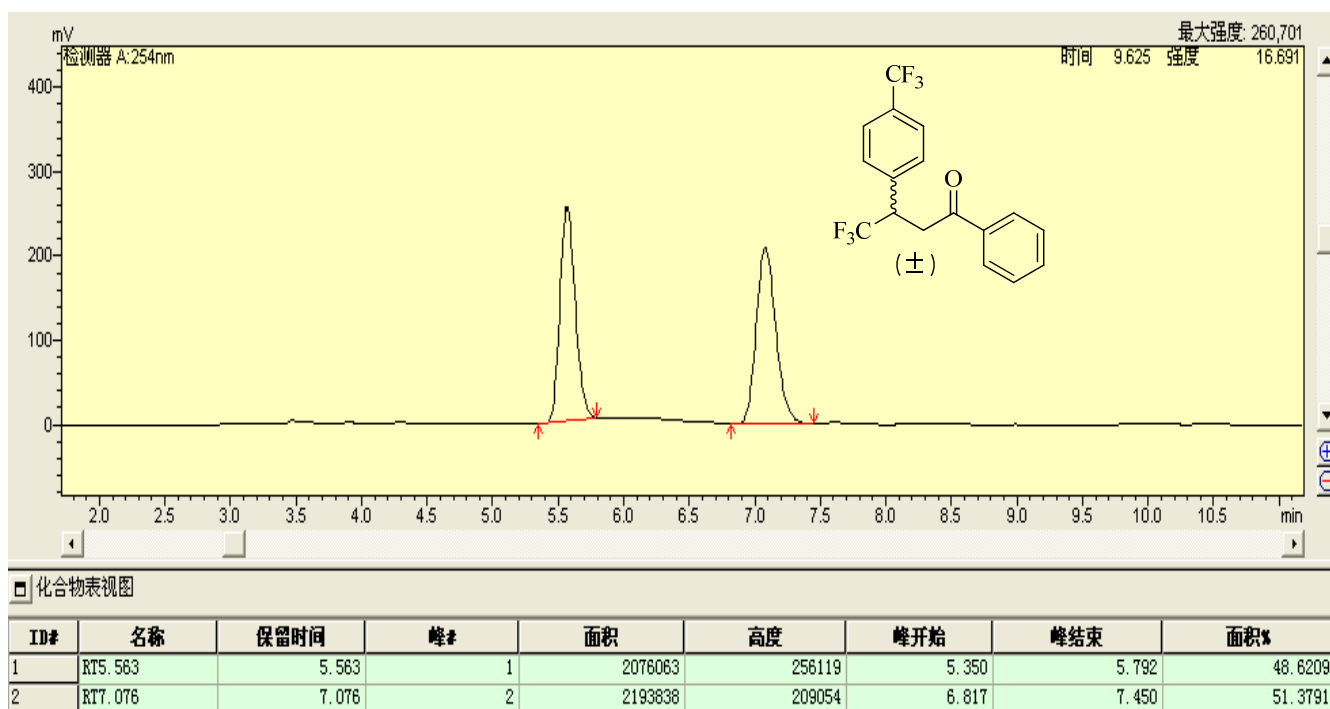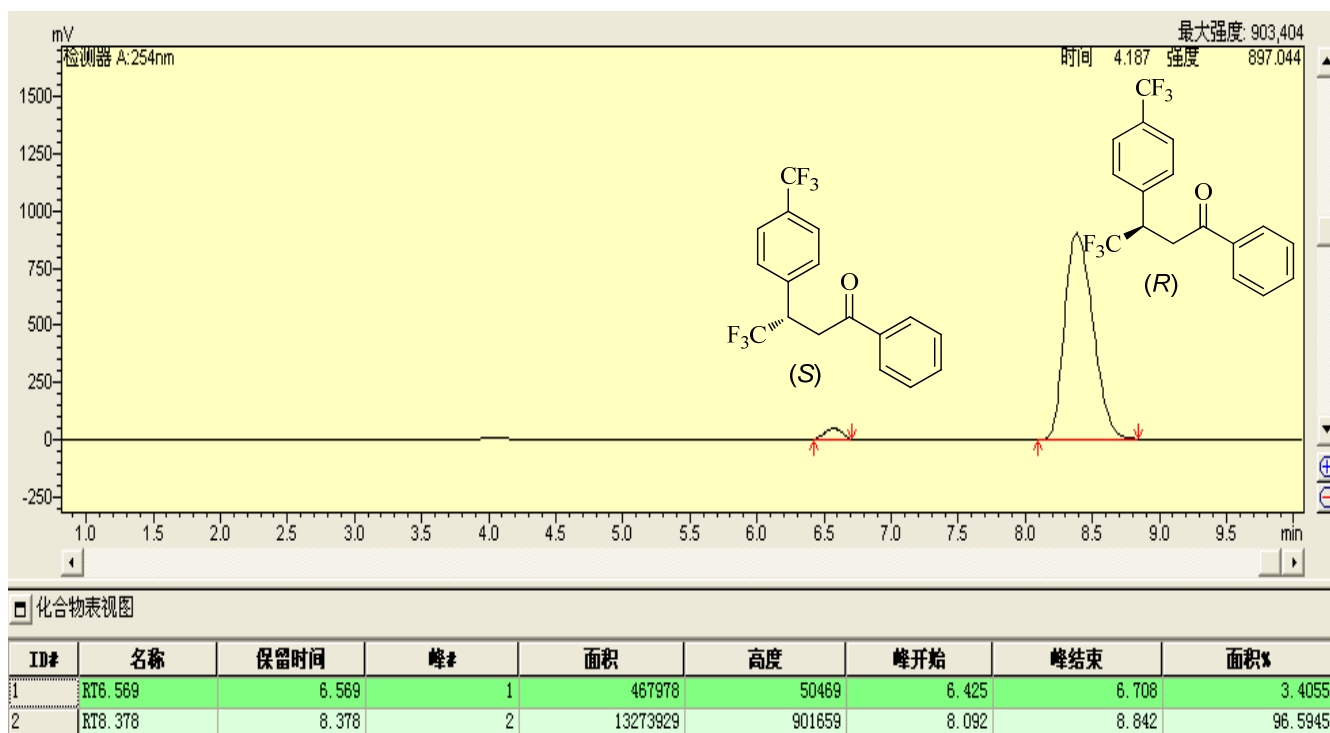

**6g:** (R)-4,4,4-trifluoro-1-phenyl-3-(p-tolyl)butan-1-one (HPLC: Chiralcel OD-H, detected at 254 nm, eluent: n-hexane/2-propanol = 95/5, flow rate = 1.0 mL/min, 25 °C).

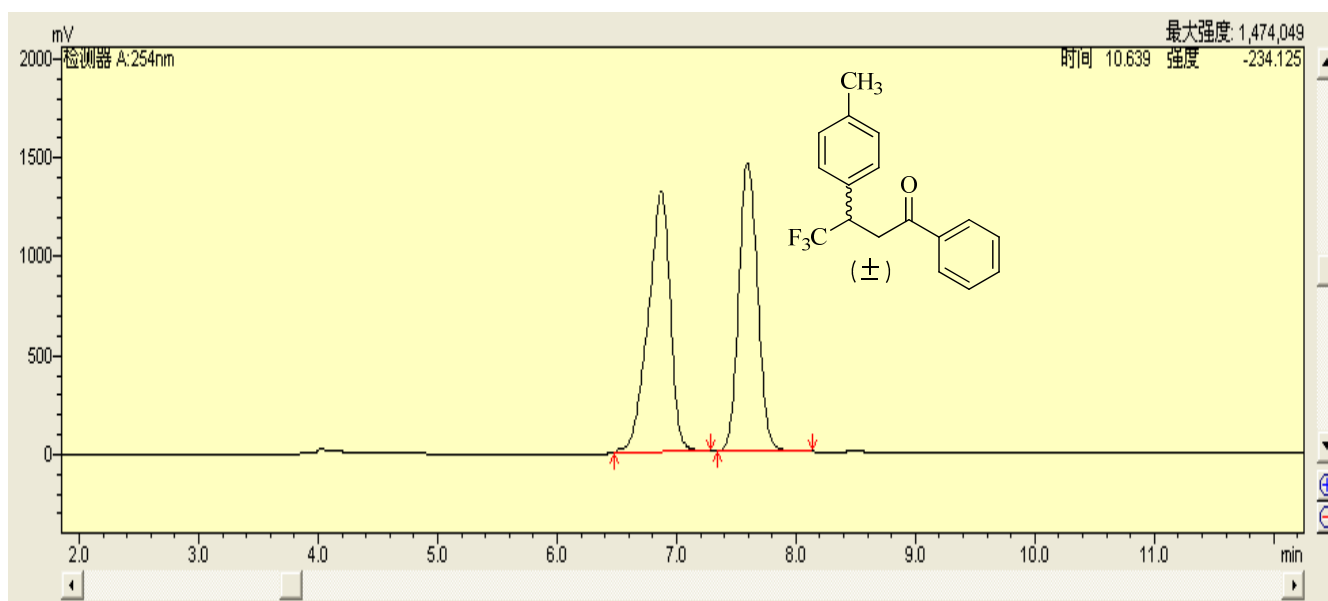

化合物表视图

| ID# | 名称      | 保留时间  | 峰# | 面积       | 高度      | 峰开始   | 峰结束   | 面积%     |
|-----|---------|-------|----|----------|---------|-------|-------|---------|
| 1   | RT6.868 | 6.868 | 1  | 17063840 | 1315622 | 6.475 | 7.283 | 51.5677 |
| 2   | RT7.591 | 7.591 | 2  | 16026354 | 1456893 | 7.342 | 8.133 | 48.4323 |

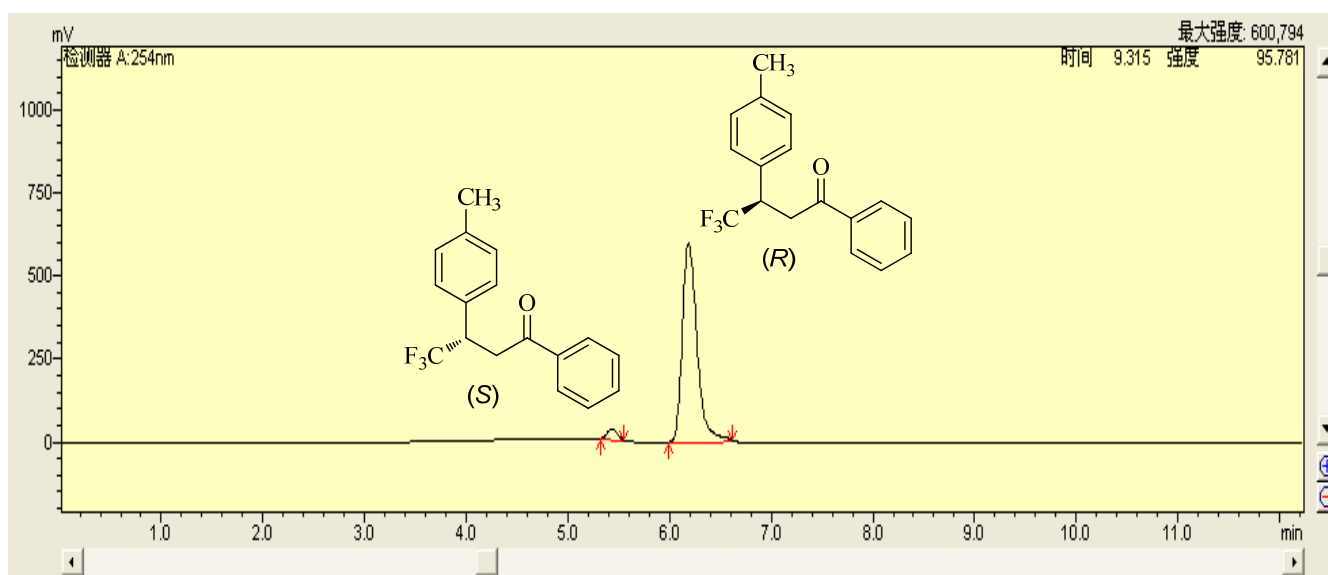

化合物表视图

| ID# | 名称      | 保留时间  | 峰# | 面积      | 高度     | 峰开始   | 峰结束   | 面积%     |
|-----|---------|-------|----|---------|--------|-------|-------|---------|
| 1   | RT5.429 | 5.429 | 1  | 212087  | 31109  | 5.325 | 5.550 | 3.3128  |
| 2   | RT6.183 | 6.183 | 2  | 6189997 | 601280 | 5.983 | 7.083 | 96.6872 |

**6h:** (R)-4,4,4-trifluoro-3-(4-methoxyphenyl)-1-phenylbutan-1-one (HPLC: Chiracel OD-H, detected at 254 nm, eluent: n-hexane/2-propanol = 95/5, flow rate = 1.0 mL/min, 25 °C).

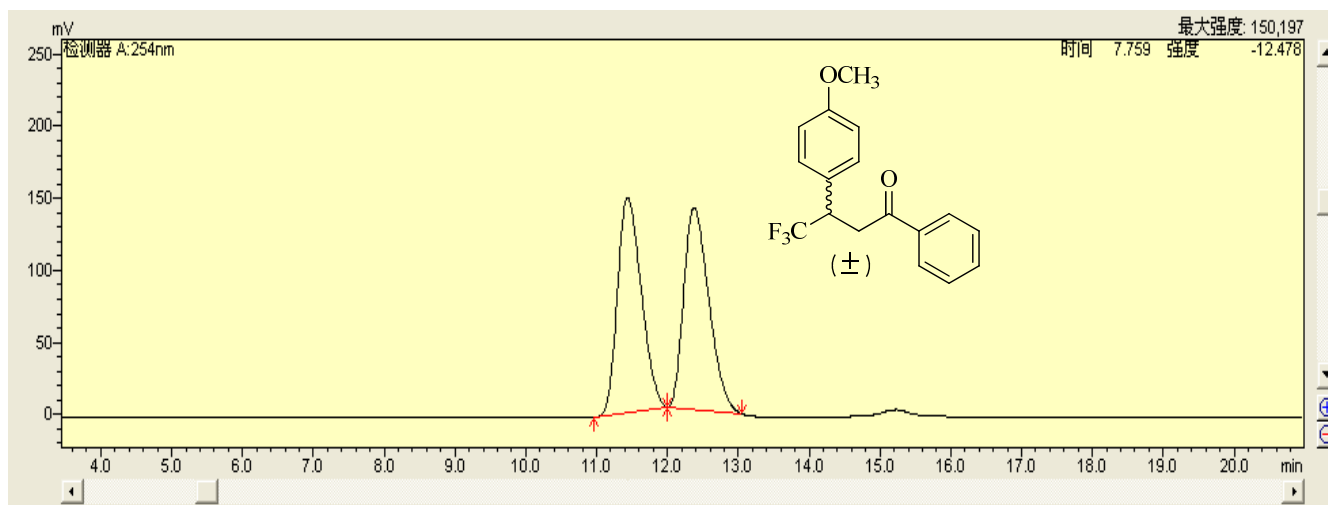

化合物表视图

| ID# | 名称       | 保留时间   | 峰# | 面积      | 高度     | 峰开始    | 峰结束    | 面积%     |
|-----|----------|--------|----|---------|--------|--------|--------|---------|
| 1   | RT11.435 | 11.435 | 1  | 3493547 | 148969 | 10.967 | 11.992 | 50.1926 |
| 2   | RT12.372 | 12.372 | 2  | 3486734 | 140004 | 11.992 | 13.050 | 49.8074 |

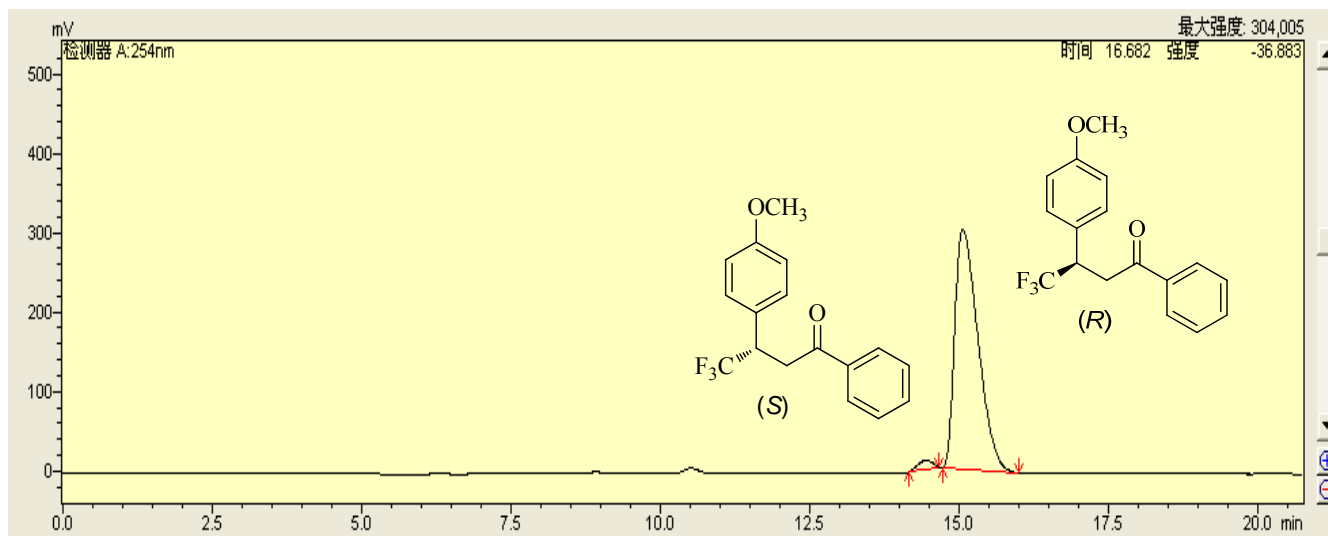

化合物表视图

| ID# | 名称       | 保留时间   | 峰# | 面积      | 高度     | 峰开始    | 峰结束    | 面积%     |
|-----|----------|--------|----|---------|--------|--------|--------|---------|
| 1   | RT14.437 | 14.437 | 1  | 193889  | 11304  | 14.158 | 14.658 | 2.3220  |
| 2   | RT15.062 | 15.062 | 2  | 8156293 | 301374 | 14.733 | 16.008 | 97.6780 |

**6i:** (*R*)-4,4,4-trifluoro-3-methyl-1-phenylbutan-1-one (HPLC: Chiracel OJ-H, detected at 254 nm, eluent: n-hexane/2-propanol = 99/1, flow rate = 0.5 mL/min, 25 °C).

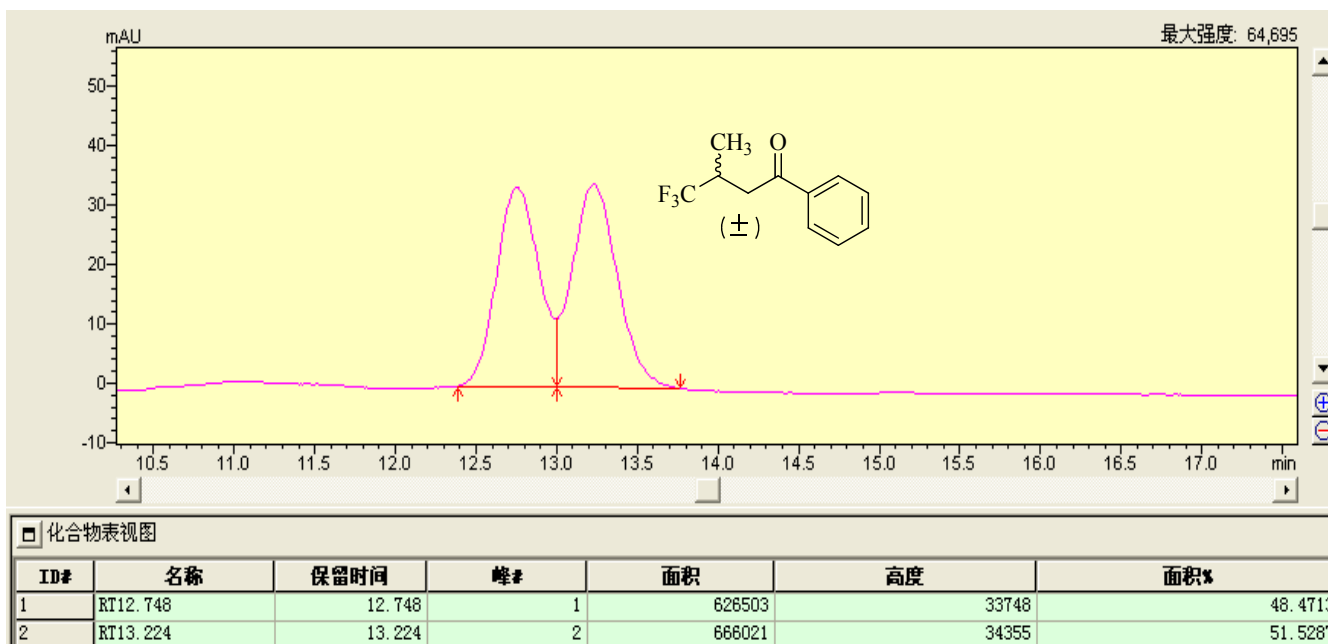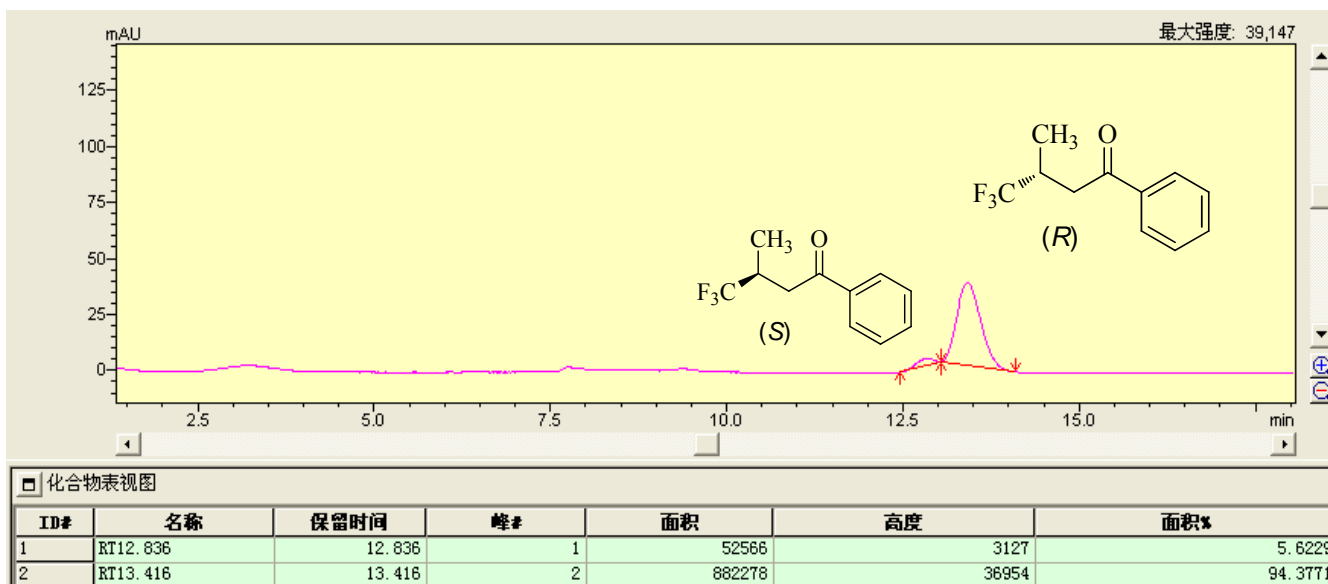

**6j:** (R)-1-(4-chlorophenyl)-4,4,4-trifluoro-3-phenylbutan-1-one (HPLC: Chiracel OD-H, detected at 254 nm, eluent: n-hexane/2-propanol = 95/5, flow rate = 1.0 mL/min, 25 °C)

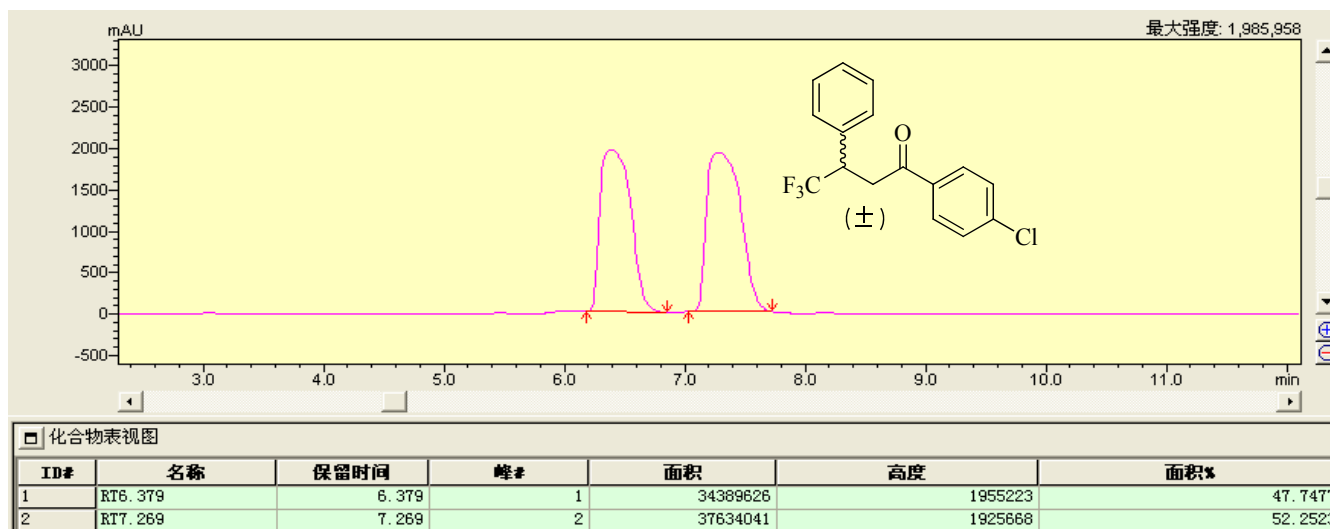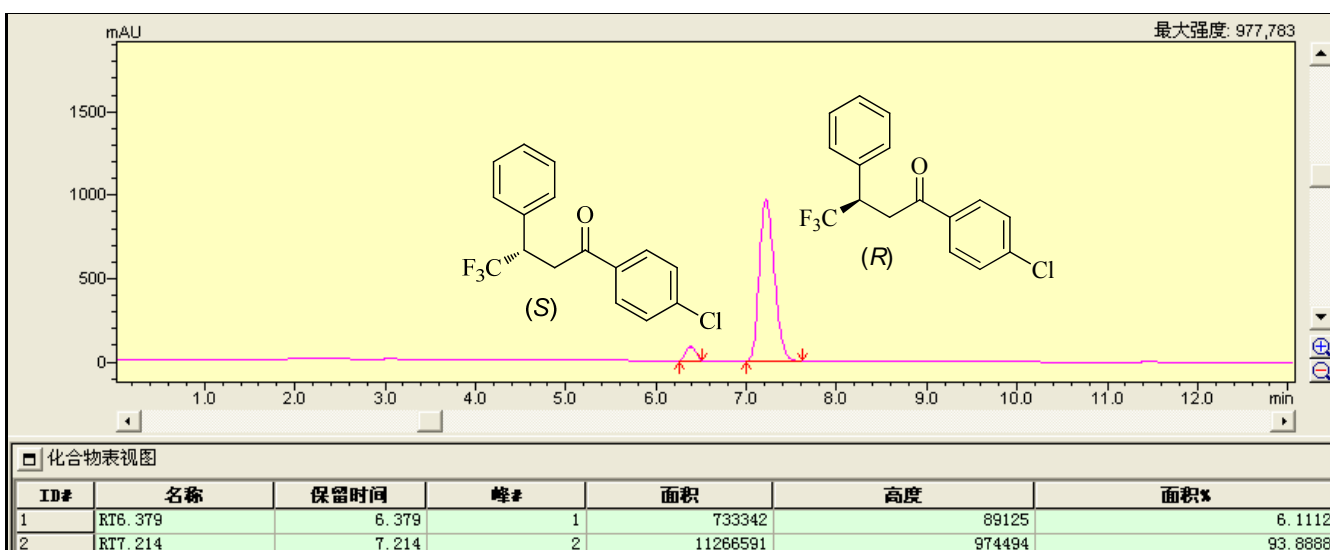

**6k:** (R)-1-(4-bromophenyl)-4,4,4-trifluoro-3-phenylbutan-1-one (HPLC: Chiracel OD-H, detected at 254 nm, eluent: n-hexane/2-propanol = 95/5, flow rate = 1.0 mL/min, 25 °C).

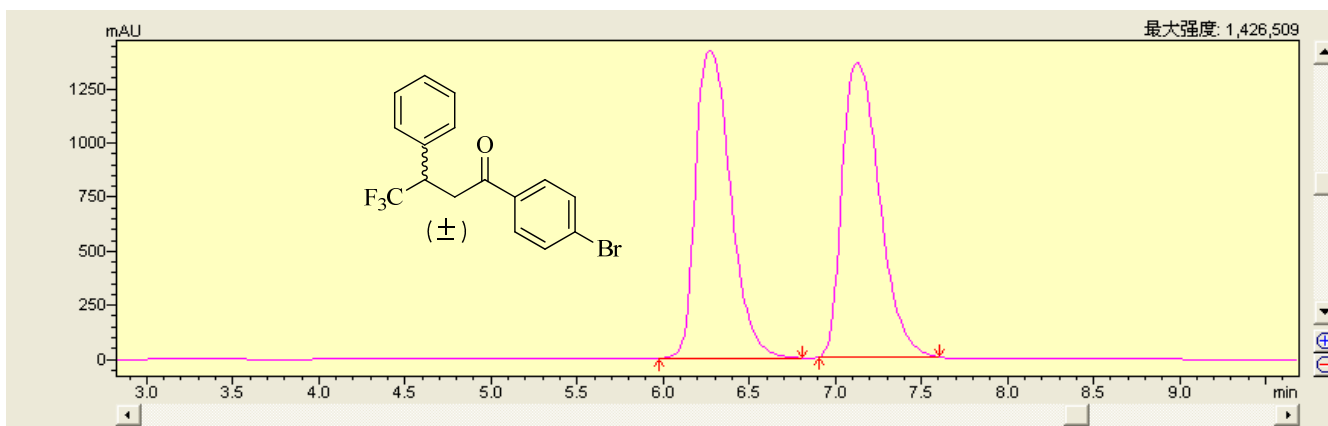

化合物表视图

| ID# | 名称      | 保留时间  | 峰# | 面积       | 高度      | 面积%     |
|-----|---------|-------|----|----------|---------|---------|
| 1   | RT6.267 | 6.267 | 1  | 20149016 | 1421975 | 49.4362 |
| 2   | RT7.123 | 7.123 | 2  | 20608809 | 1362230 | 50.5638 |

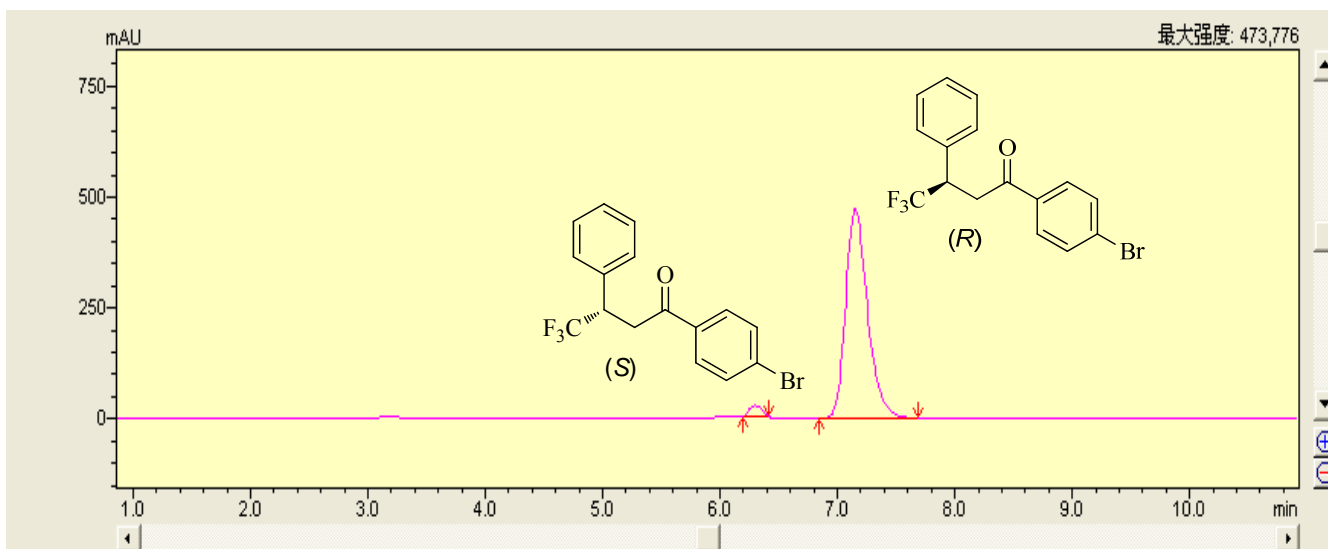

化合物表视图

| ID# | 名称      | 保留时间  | 峰# | 面积      | 高度     | 面积%     |
|-----|---------|-------|----|---------|--------|---------|
| 1   | RT6.294 | 6.294 | 1  | 187476  | 24887  | 2.9784  |
| 2   | RT7.147 | 7.147 | 2  | 6106985 | 471540 | 97.0216 |

**6L:** (R)-4,4,4-trifluoro-3-phenyl-1-(p-tolyl)butan-1-one (HPLC: Chiracel OD-H, detected at 254 nm, eluent: n-hexane/2-propanol = 95/5, flow rate = 1.0 mL/min, 25 °C).

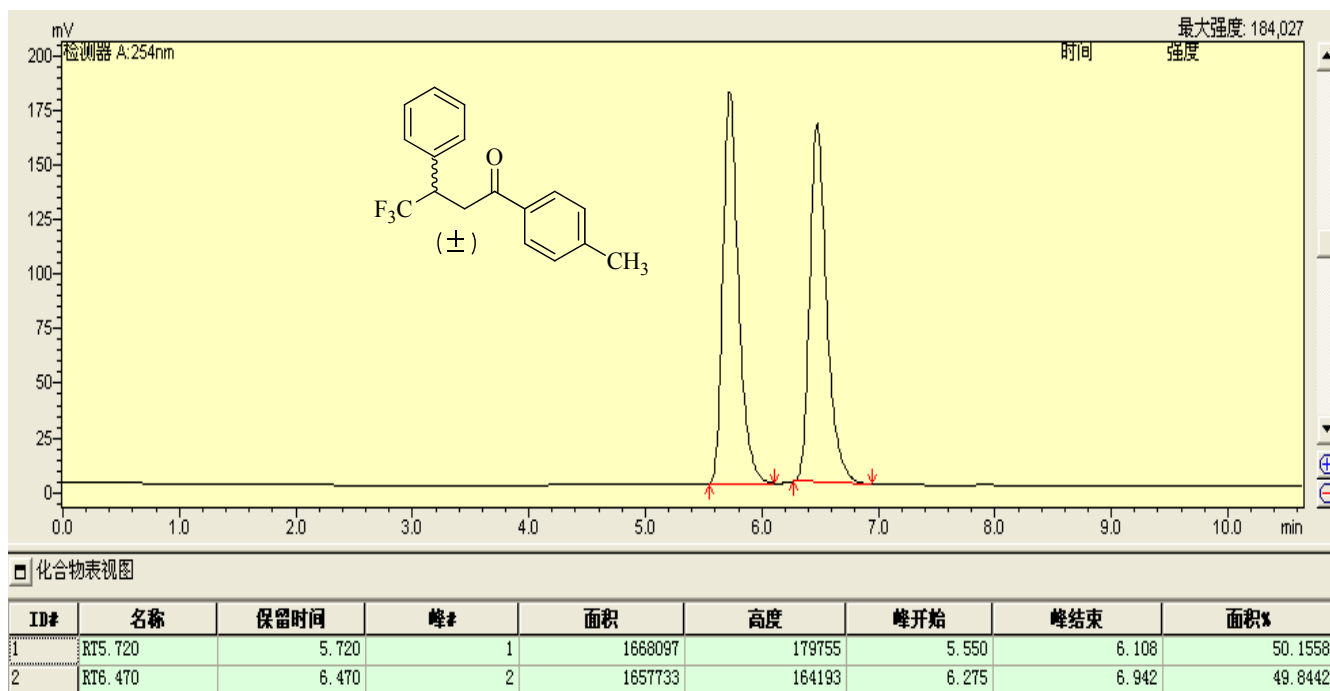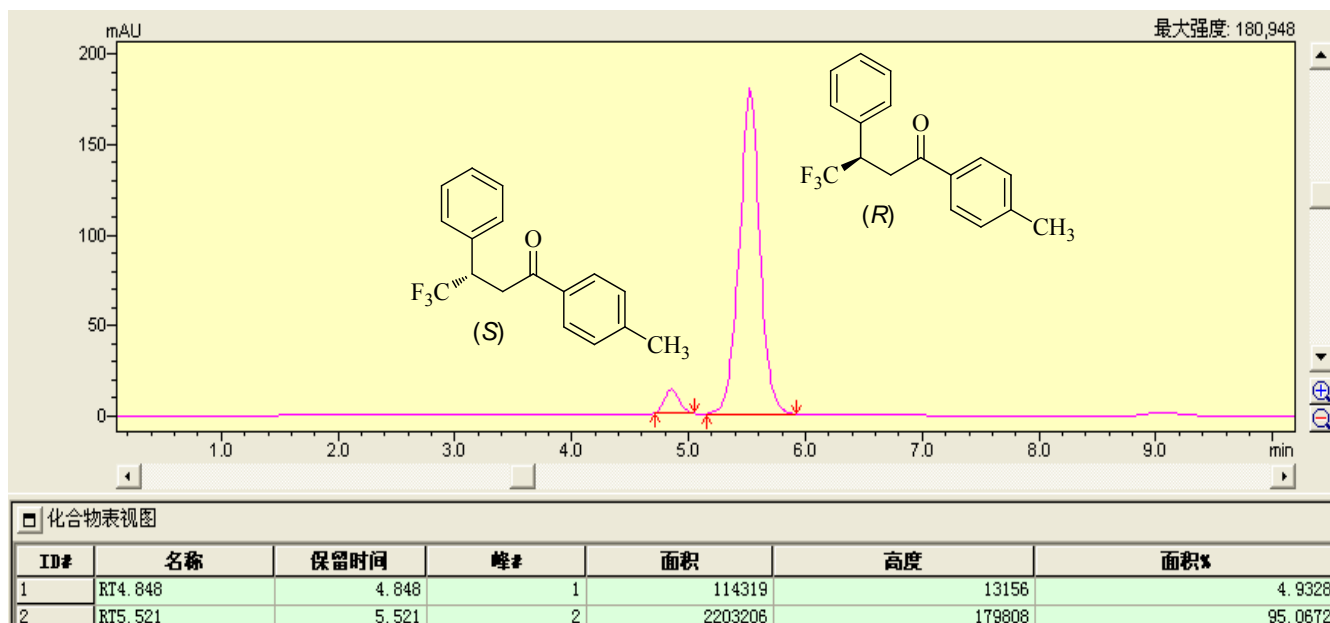



**6m: (R)-4,4,4-trifluoro-1-(4-methoxyphenyl)-3-phenylbutan-1-one (4m):** (HPLC: Chiracel OD-H, detected at 254 nm, eluent: n-hexane/2-propanol = 95/5, flow rate = 1.0 mL/min, 25 °C).

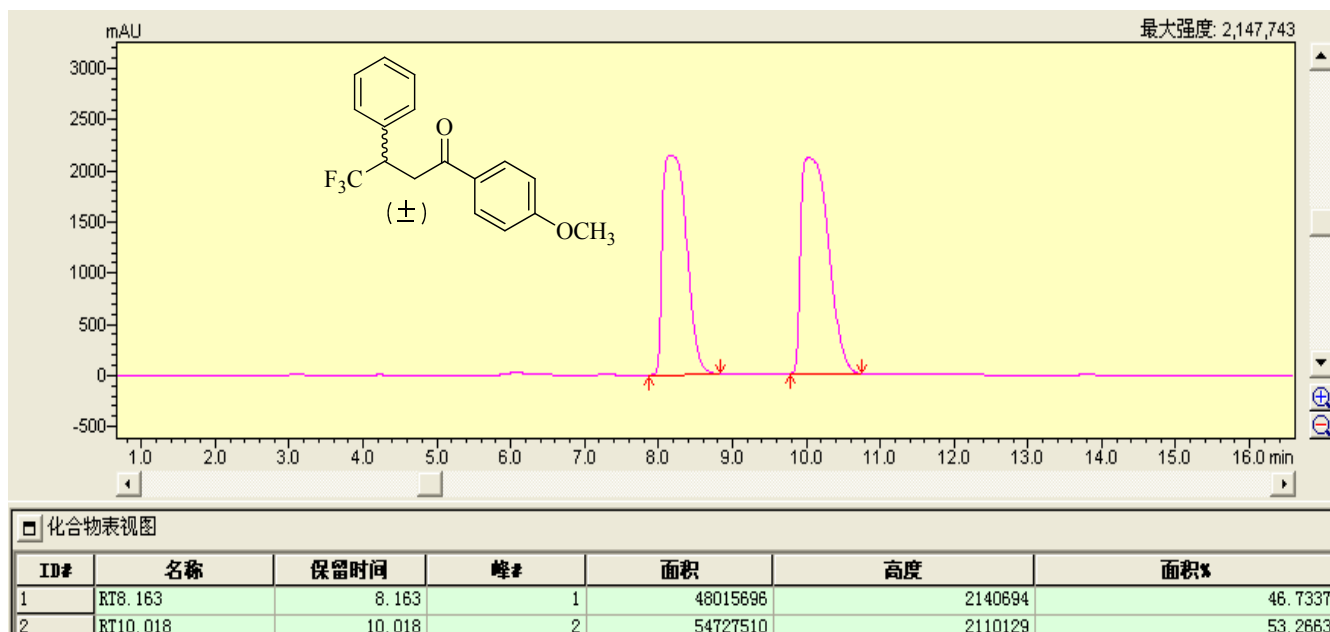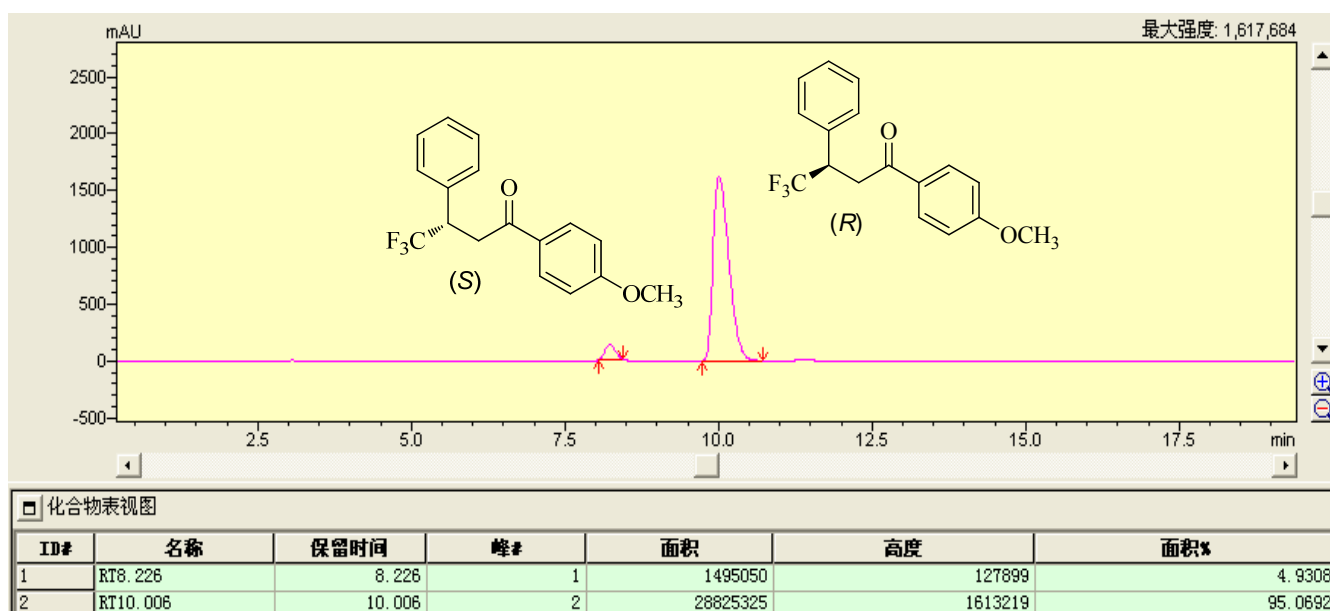

**6n: (R)-1-(3-chlorophenyl)-4,4,4-trifluoro-3-phenylbutan-1-one** (HPLC: Chiracel OD-H, detected at 254 nm, eluent: n-hexane/2-propanol = 97/3, flow rate = 1.0 mL/min, 25 °C)

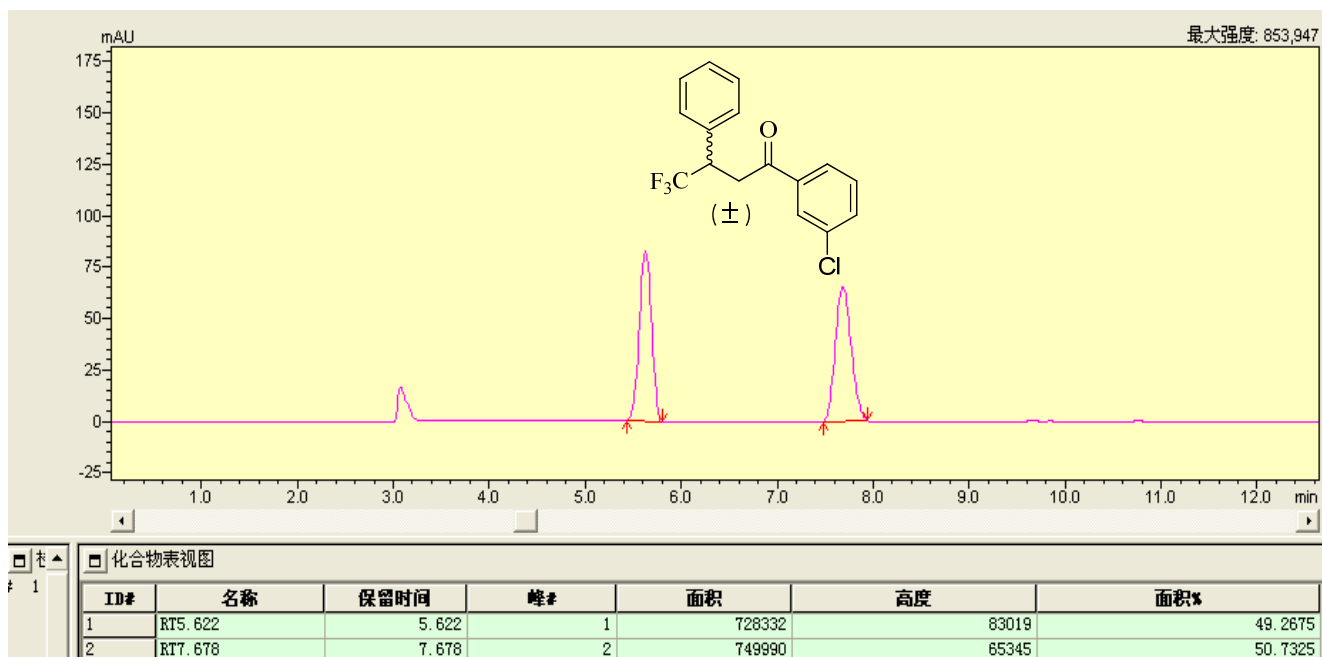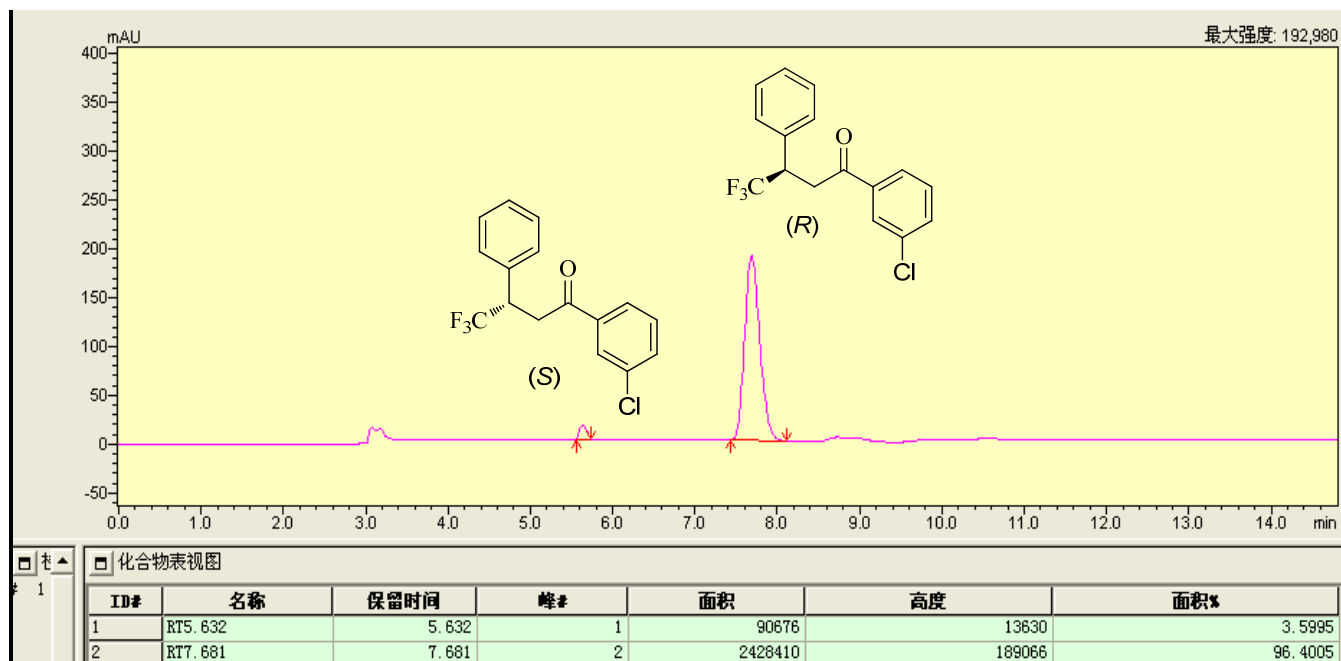

**60: (R)-1-(3-bromophenyl)-4,4,4-trifluoro-3-phenylbutan-1-one** (HPLC: Chiracel OD-H, detected at 254 nm, eluent: n-hexane/2-propanol = 97/3, flow rate = 1.0 mL/min, 25 °C).

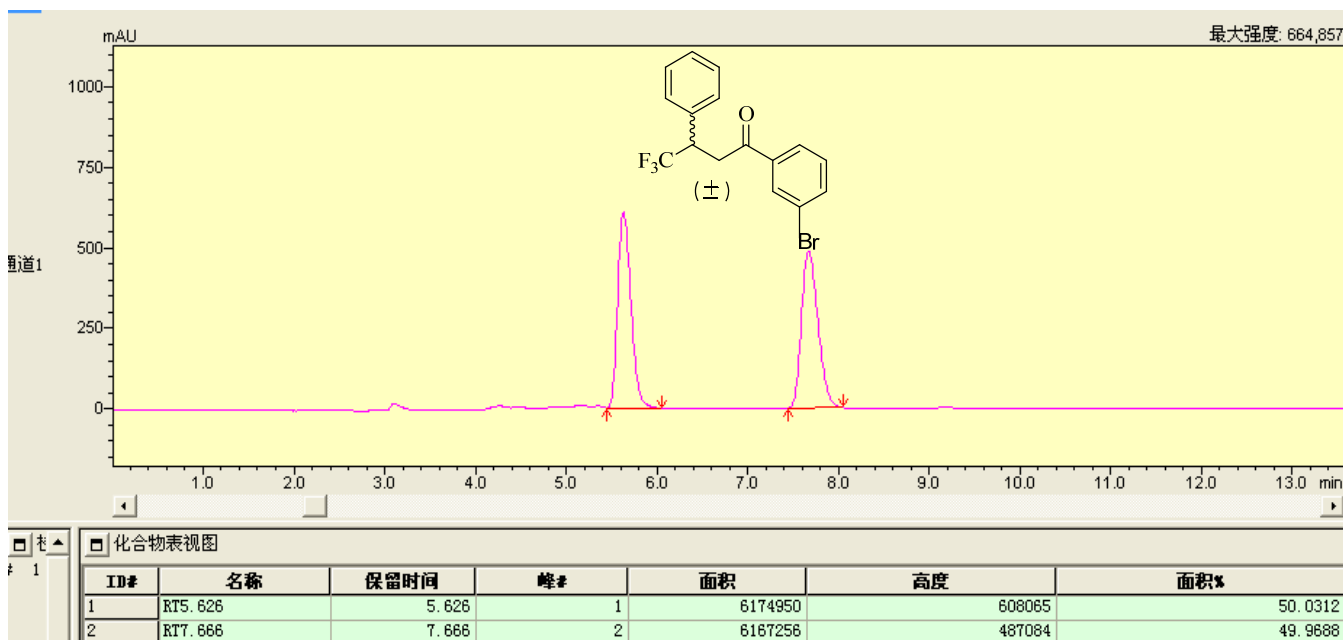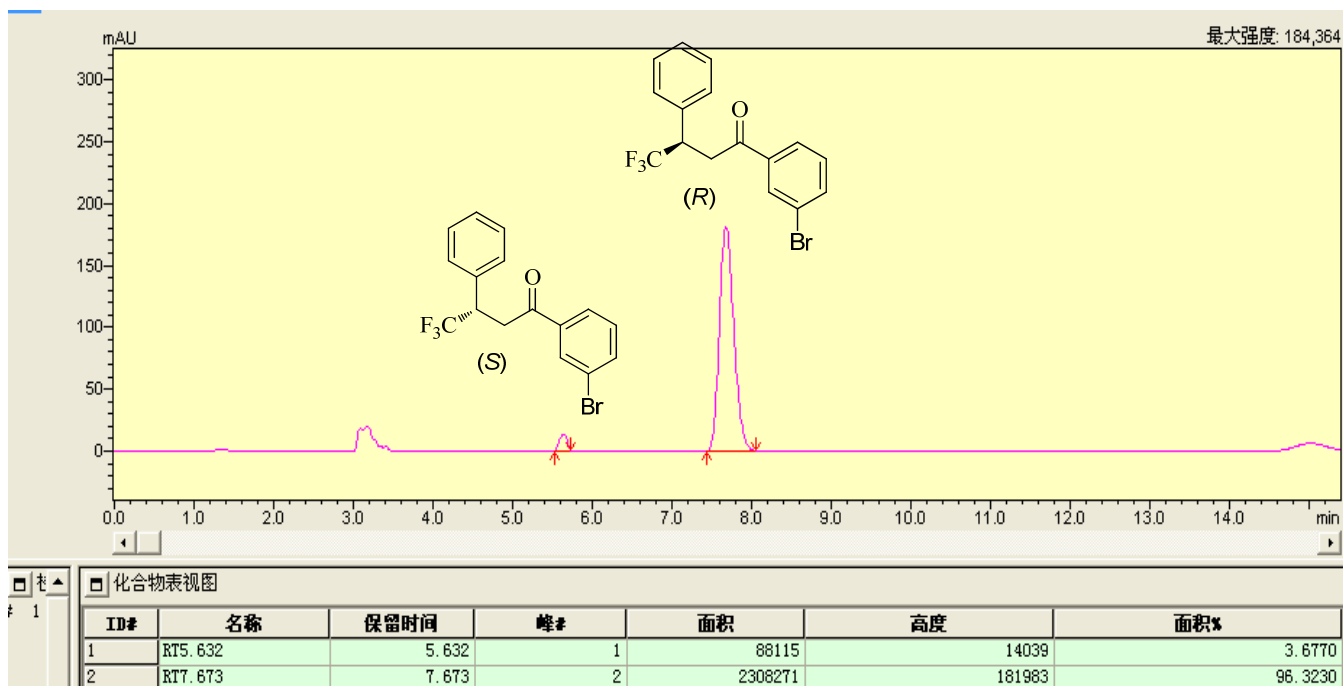

**6p:** (R)-4,4,4-trifluoro-1-(2-methoxyphenyl)-3-phenylbutan-1-one (HPLC: Chiracel OD-H, detected at 254 nm, eluent: n-hexane/2-propanol = 97/3, flow rate = 1.0 mL/min, 25 °C).

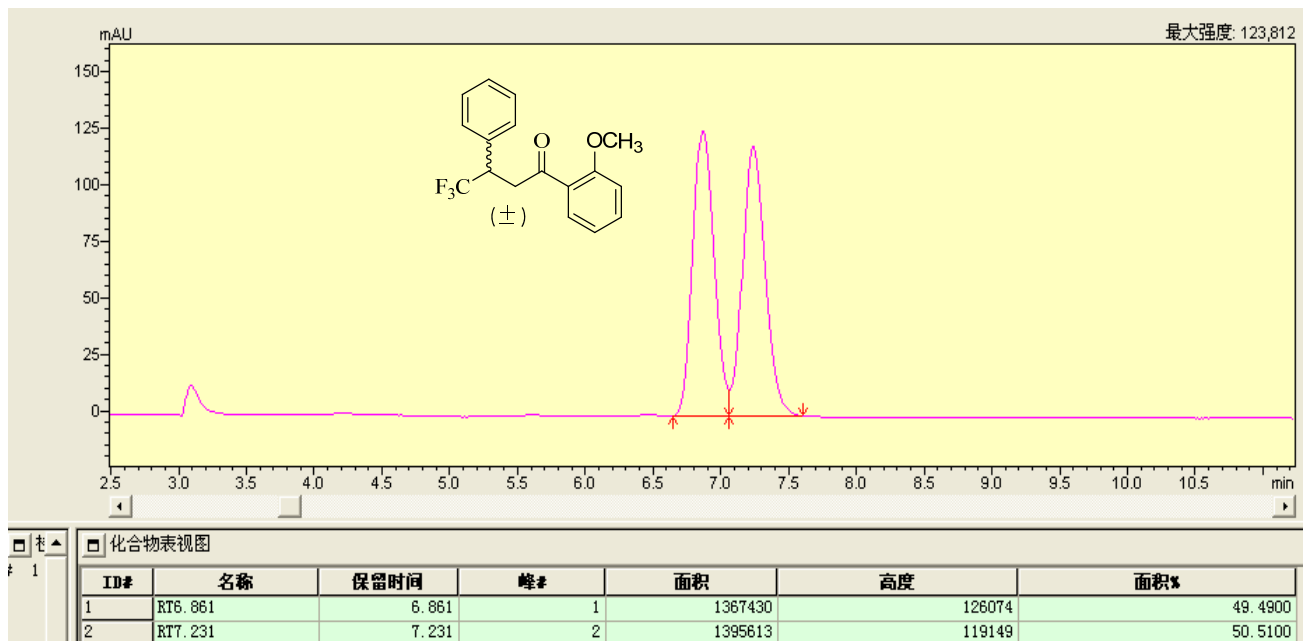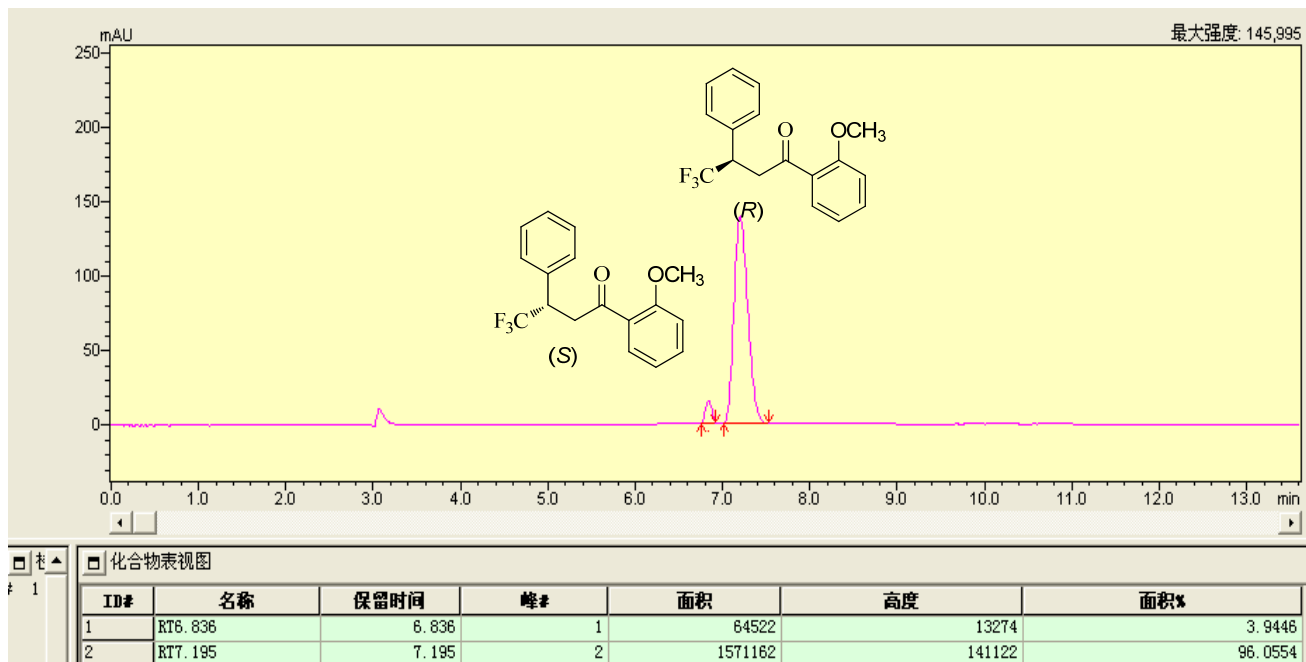

**6q:** (R)-1-(4-bromophenyl)-4,4,4-trifluoro-3-(4-fluorophenyl)butan-1-one (HPLC: Chiralcel OJ-H, detected at 254 nm, eluent: n-hexane/2-propanol = 95/5, flow rate = 1.5 mL/min, 25 °C).

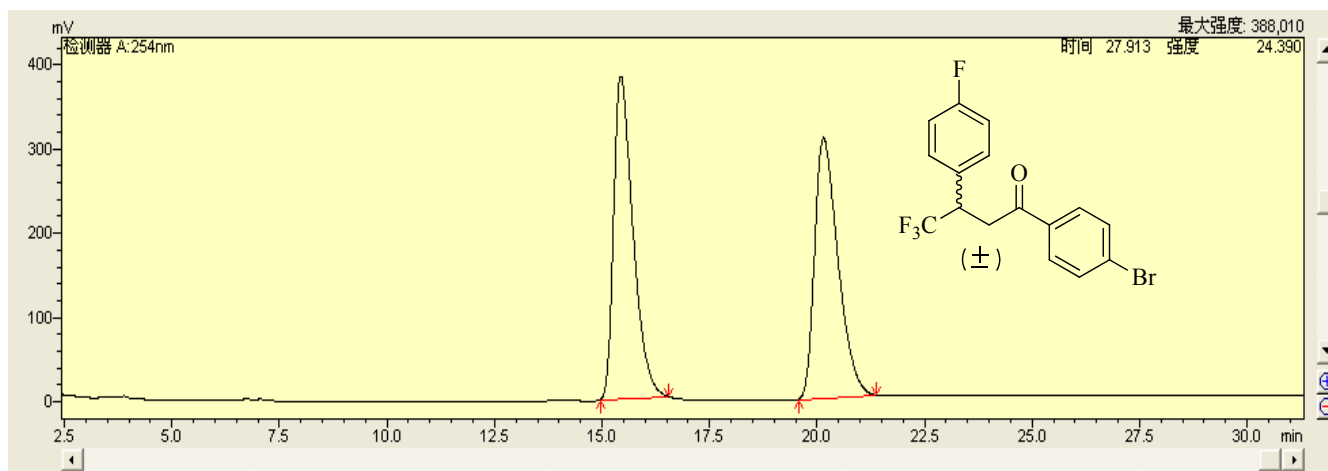

化合物表视图

| ID# | 名称       | 保留时间   | 峰# | 面积       | 高度     | 峰开始    | 峰结束    | 面积%     |
|-----|----------|--------|----|----------|--------|--------|--------|---------|
| 1   | RT15.433 | 15.433 | 1  | 12016481 | 384356 | 14.967 | 16.558 | 50.6332 |
| 2   | RT20.148 | 20.148 | 2  | 11715949 | 309185 | 19.575 | 21.383 | 49.3668 |

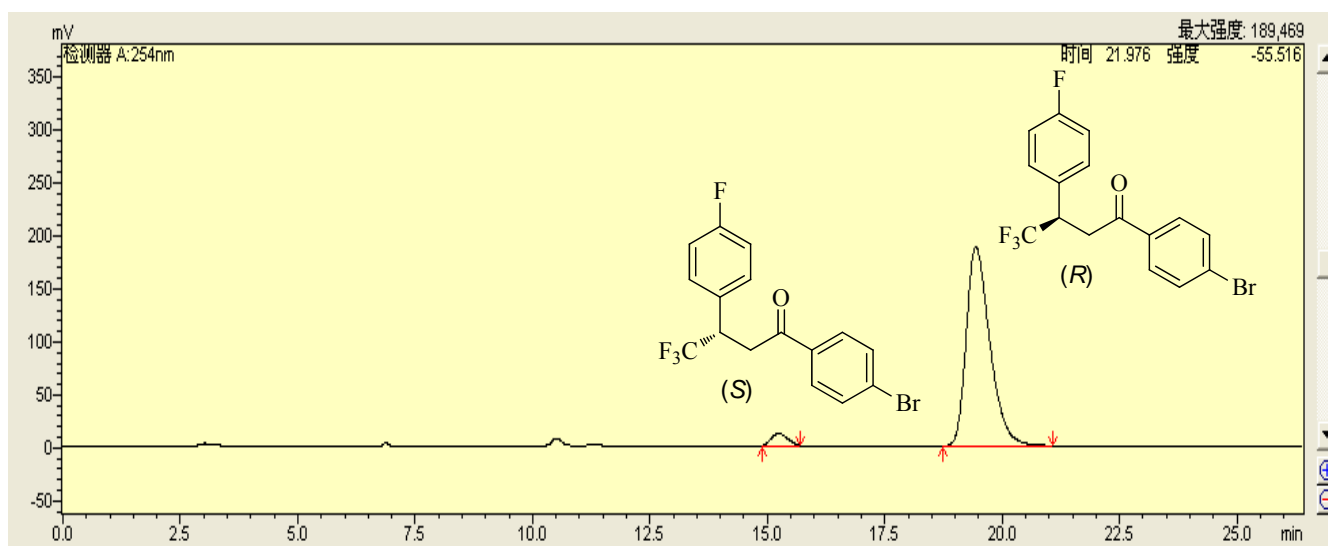

化合物表视图

| ID# | 名称       | 保留时间   | 峰# | 面积      | 高度     | 峰开始    | 峰结束    | 面积%     |
|-----|----------|--------|----|---------|--------|--------|--------|---------|
| 1   | RT15.244 | 15.244 | 1  | 297211  | 11815  | 14.883 | 15.700 | 4.3042  |
| 2   | RT19.438 | 19.438 | 2  | 6608002 | 187855 | 18.750 | 21.083 | 95.6958 |

**6r: (R)-1,3-bis(4-bromophenyl)-4,4,4-trifluorobutan-1-one (4o):** (HPLC: Chiracel OJ-H, detected at 254 nm, eluent: n-hexane/2-propanol = 95/5, flow rate = 1.5 mL/min, 25 °C).

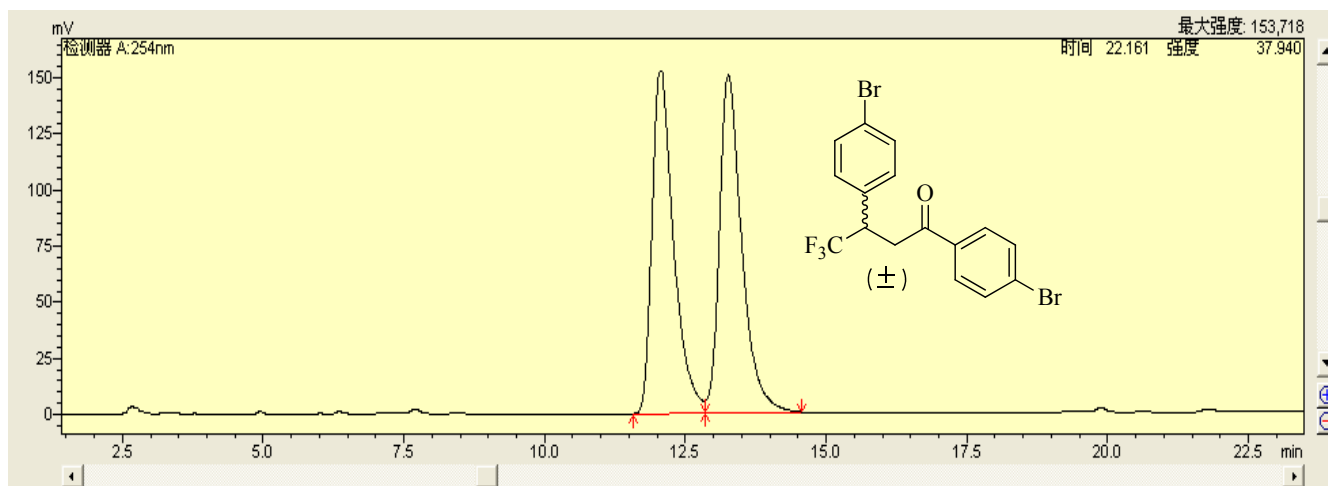

化合物视图

| ID# | 名称       | 保留时间   | 峰# | 面积      | 高度     | 峰开始    | 峰结束    | 面积%     |
|-----|----------|--------|----|---------|--------|--------|--------|---------|
| 1   | RT12.050 | 12.050 | 1  | 4079839 | 153213 | 11.587 | 12.842 | 49.4717 |
| 2   | RT13.260 | 13.260 | 2  | 4166980 | 150572 | 12.842 | 14.575 | 50.5283 |

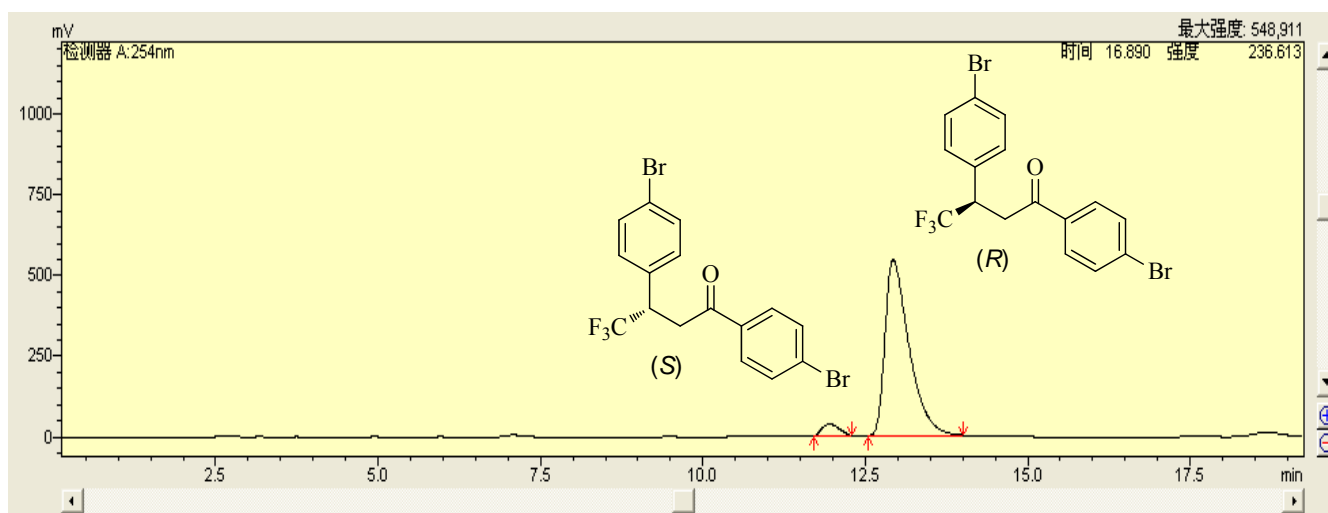

化合物视图

| ID# | 名称       | 保留时间   | 峰# | 面积       | 高度     | 峰开始    | 峰结束    | 面积%     |
|-----|----------|--------|----|----------|--------|--------|--------|---------|
| 1   | RT11.949 | 11.949 | 1  | 744067   | 38768  | 11.717 | 12.300 | 4.9570  |
| 2   | RT12.928 | 12.928 | 2  | 14266521 | 545199 | 12.542 | 14.325 | 95.0430 |

**Figure S5.** Enantioselectivereductions of  $\beta$ -trifluoromethylated- $\alpha,\beta$ -unsaturated ketones to chiral  $\beta$ -trifluoromethylated alcohols. [The products were analyzed by a HPLC with a UV-Vis detector using a Daicel OD-H or AD-H chiralcel column ( $\Phi 0.46 \times 25$  cm). Please see literatures (Catal. Sci. Technol. 2015, 5, 1750; Angew. Chem. Int. Ed. 2012, 51, 6467).

**Translation of Chinese to English is as follows:**

| Peak | RetTime [min] | Area     | Area%   | Height  | Height% |
|------|---------------|----------|---------|---------|---------|
| 峰号   | 保留时间          | 面积       | 面积%     | 峰高      | 峰高%     |
| 1    | 18.474        | 235819.9 | 92.0500 | 13827.2 | 79.0685 |
| 2    | 19.395        | 9109.7   | 3.5589  | 1042.4  | 5.9806  |

**5a:** (*R,E*)-4,4,4-trifluoro-1,3-diphenylbut-2-en-1-ol (HPLC: Chiralcel OD-H, detected at 254 nm, eluent: n-hexane/2-propanol = 95/5, flow rate = 1.0 mL/min, 25 °C).

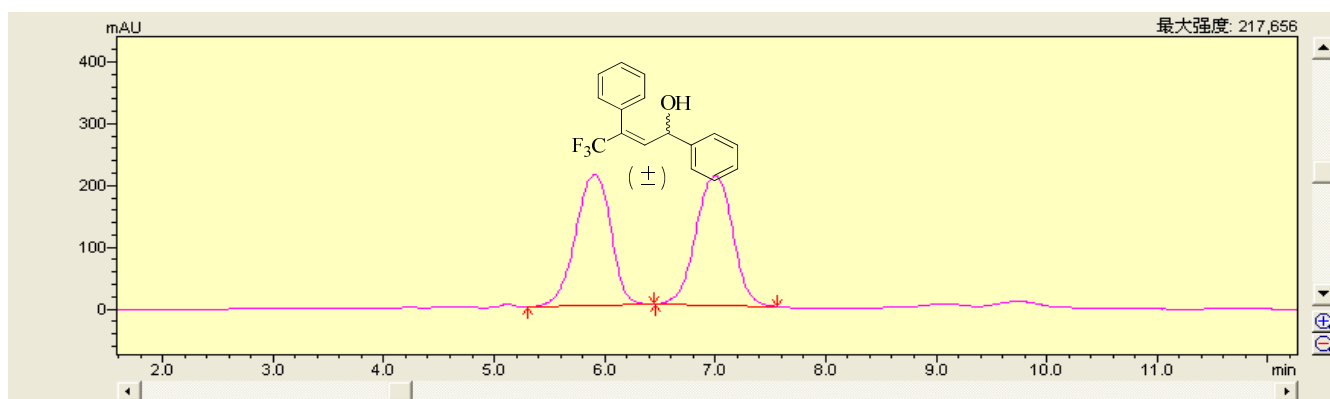

| ID# | 名称      | 保留时间  | 峰# | 面积      | 高度     | 面积%     |
|-----|---------|-------|----|---------|--------|---------|
| 1   | RT5.904 | 5.904 | 1  | 4698382 | 211753 | 49.2228 |
| 2   | RT6.995 | 6.995 | 2  | 4848753 | 209191 | 50.7772 |

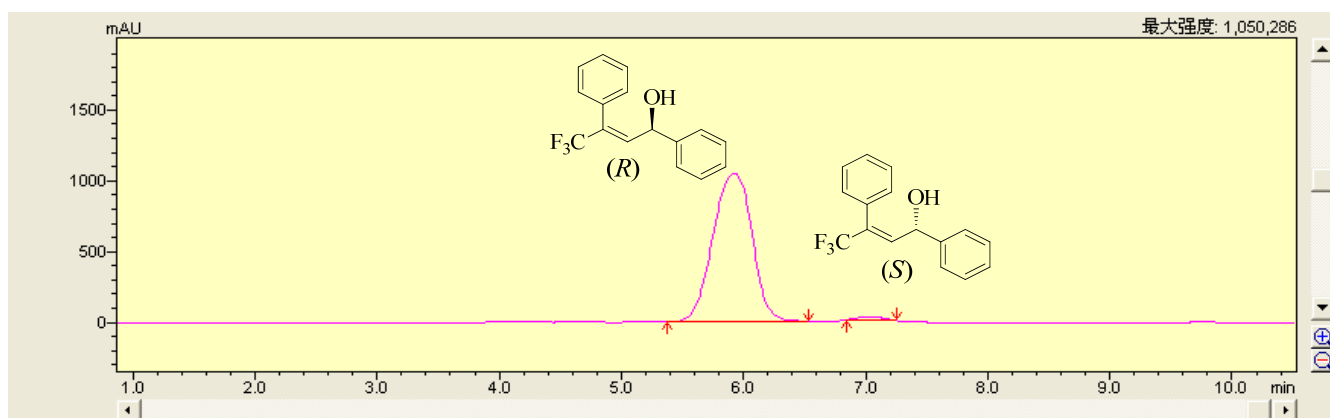

| ID# | 名称      | 保留时间  | 峰# | 面积       | 高度      | 面积%     |
|-----|---------|-------|----|----------|---------|---------|
| 1   | RT5.917 | 5.917 | 1  | 23384182 | 1045374 | 98.5174 |
| 2   | RT7.027 | 7.027 | 2  | 351920   | 23303   | 1.4826  |

**5b:** (*R,E*)-4,4,4-trifluoro-3-(4-fluorophenyl)-1-phenylbut-2-en-1-ol (HPLC: Chiralcel OD-H, detected at 254 nm, eluent: n-hexane/2-propanol = 95/5, flow rate = 1.0 mL/min, 25 °C).

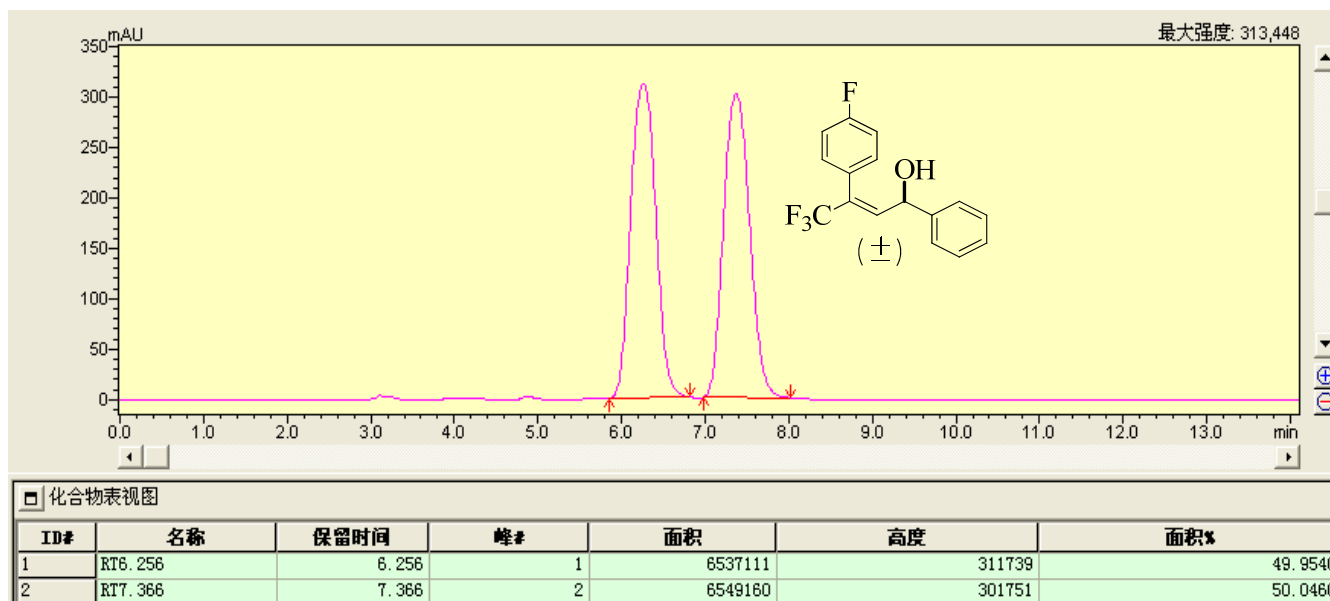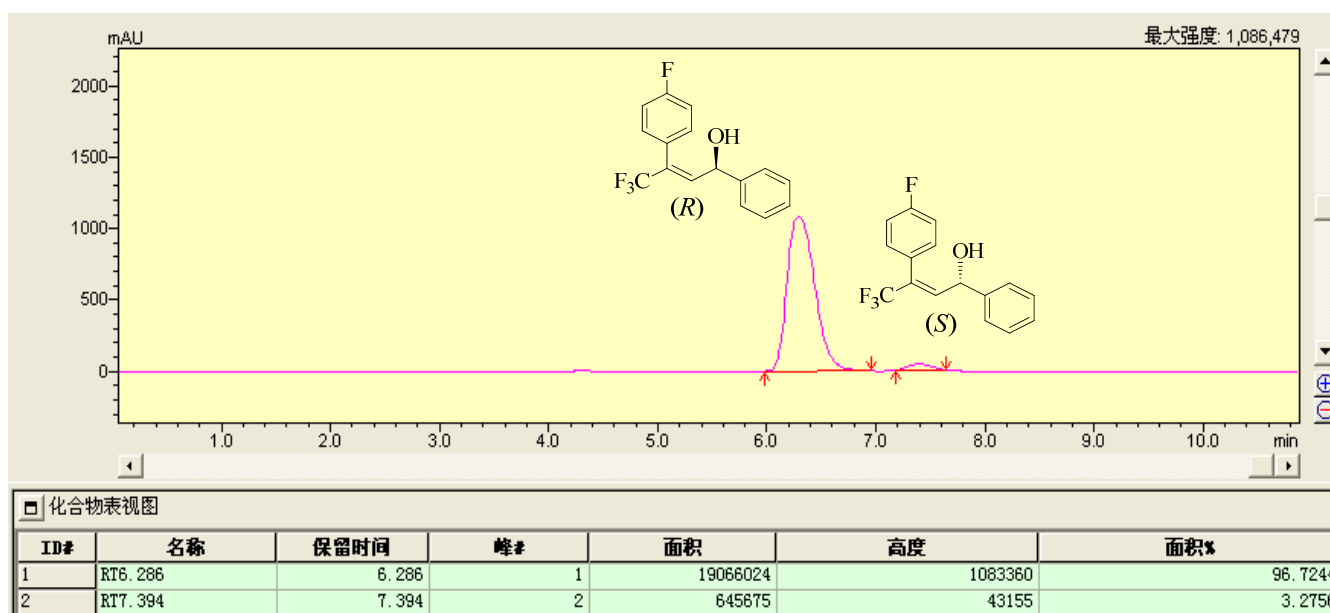



**5c: (R,E)-3-(4-chlorophenyl)-4,4,4-trifluoro-1-phenylbut-2-en-1-ol** (HPLC: Chiralcel OD-H, detected at 254 nm, eluent: n-hexane/2-propanol = 95/5, flow rate = 1.0 mL/min, 25 °C).

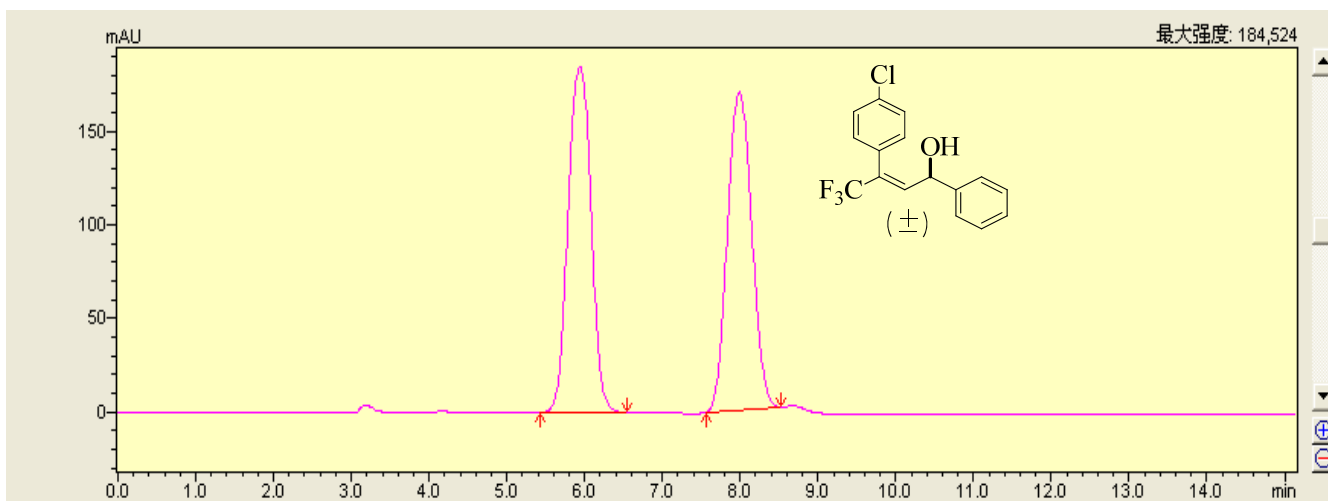

化合物表视图

| ID# | 名称      | 保留时间  | 峰# | 面积      | 高度     | 面积%     |
|-----|---------|-------|----|---------|--------|---------|
| 1   | RT5.936 | 5.936 | 1  | 3822012 | 185032 | 50.7906 |
| 2   | RT7.985 | 7.985 | 2  | 3703022 | 170076 | 49.2094 |

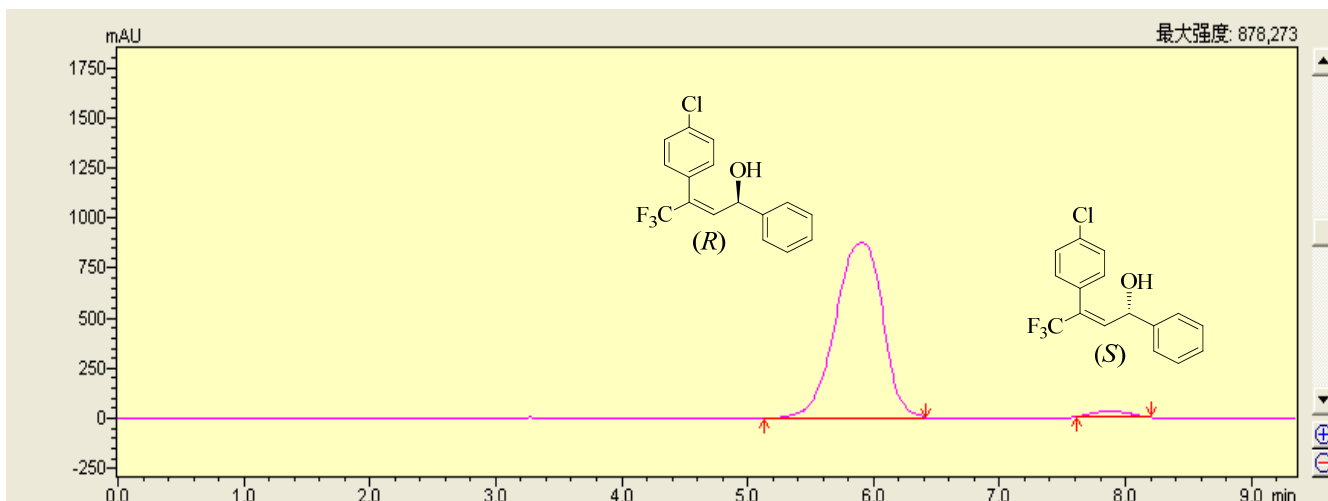

化合物表视图

| ID# | 名称      | 保留时间  | 峰# | 面积       | 高度     | 面积%     |
|-----|---------|-------|----|----------|--------|---------|
| 1   | RT5.900 | 5.900 | 1  | 22937359 | 877564 | 97.5224 |
| 2   | RT7.880 | 7.880 | 2  | 582729   | 28561  | 2.4776  |

**5d:** (*R,E*)-3-(4-bromophenyl)-4,4,4-trifluoro-1-phenylbut-2-en-1-ol (HPLC: Chiracel OD-H, detected at 254 nm, eluent: n-hexane/2-propanol = 95/5, flow rate = 1.0 mL/min, 25 °C).

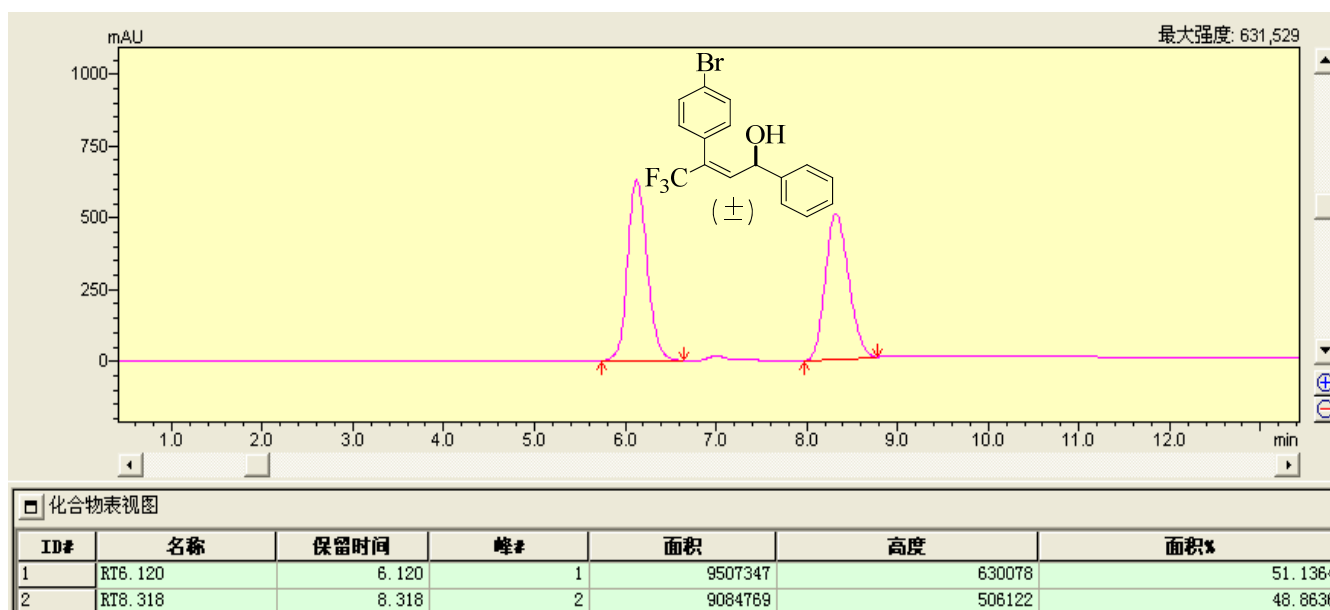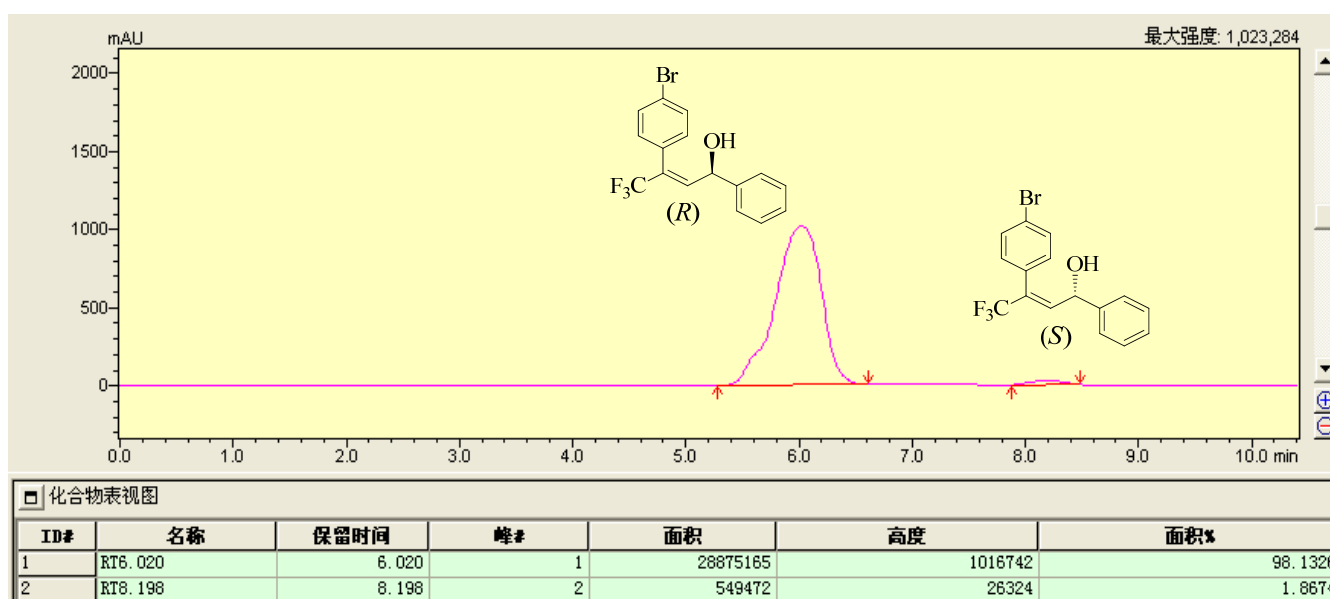

**5e:** (*R,E*)-3-(3-bromophenyl)-4,4,4-trifluoro-1-phenylbut-2-en-1-ol (HPLC: Chiracel OD-H, detected at 254 nm, eluent: n-hexane/2-propanol = 95/5, flow rate = 1.0 mL/min, 25 °C).

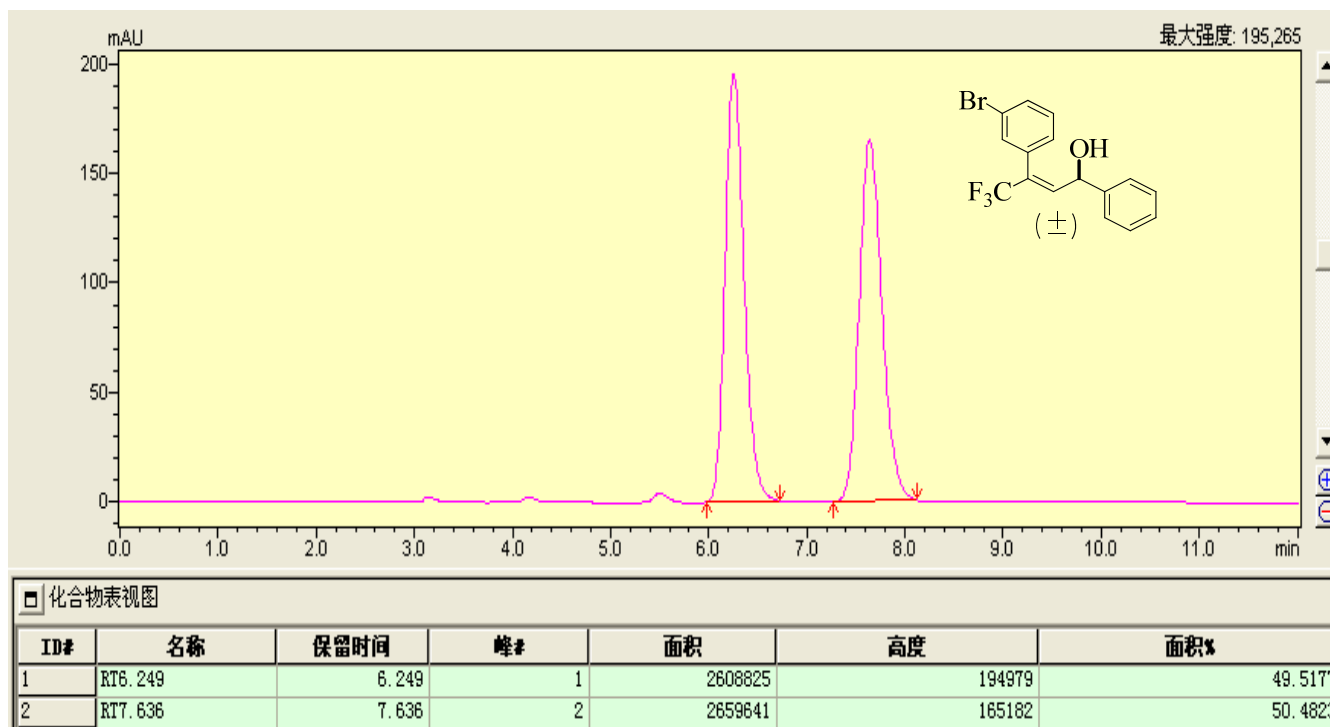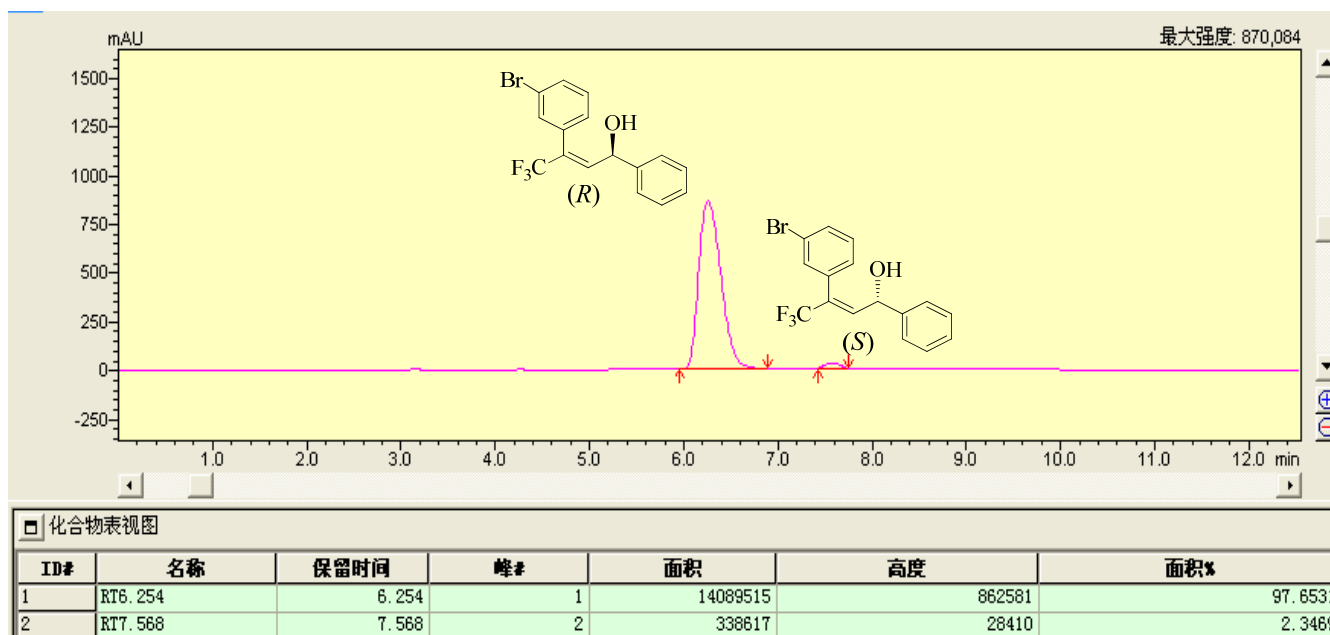

**5f: (R,E)-4,4,4-trifluoro-1-phenyl-3-(4-(trifluoromethyl)phenyl)but-2-en-1-ol** (HPLC: Chiracel OD-H, detected at 254 nm, eluent: n-hexane/2-propanol = 97/3, flow rate = 1.0 mL/min, 25 °C).

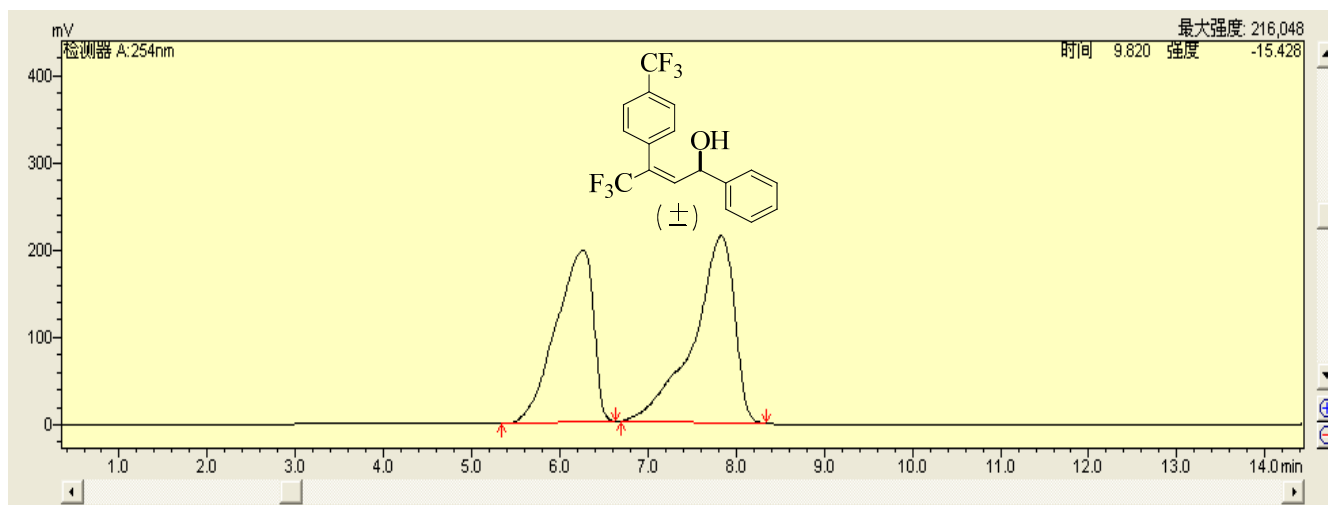

化合物表视图

| ID# | 名称      | 保留时间  | 峰# | 面积      | 高度     | 峰开始   | 峰结束   | 面积%     |
|-----|---------|-------|----|---------|--------|-------|-------|---------|
| 1   | RT6.261 | 6.261 | 1  | 5842032 | 197596 | 5.333 | 6.625 | 45.7465 |
| 2   | RT7.826 | 7.826 | 2  | 6928428 | 213650 | 6.700 | 8.342 | 54.2535 |

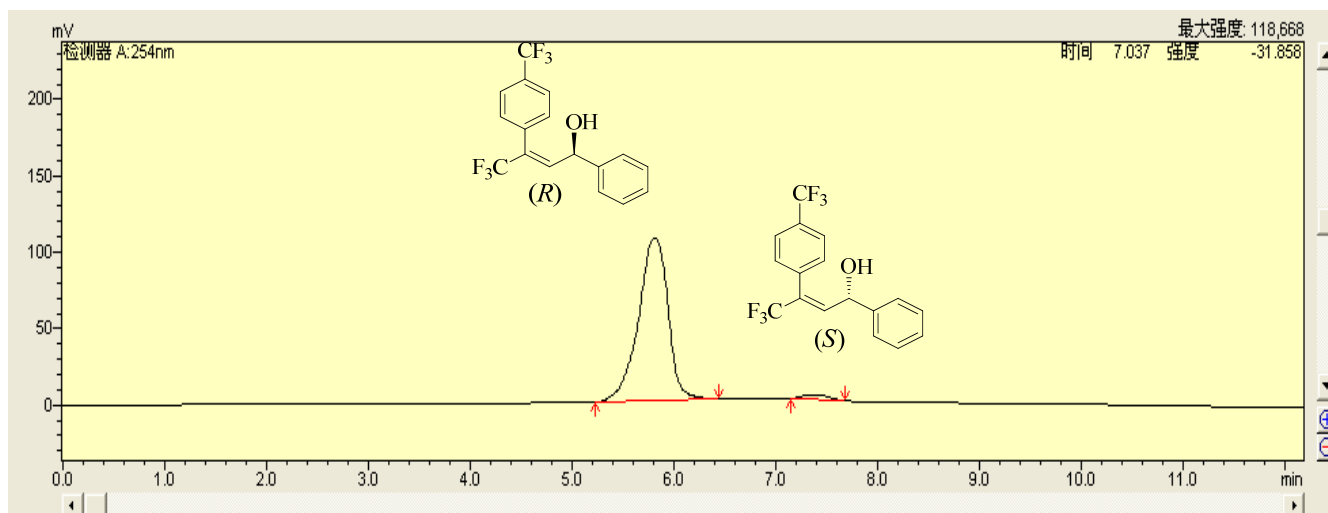

化合物表视图

| ID# | 名称      | 保留时间  | 峰# | 面积      | 高度     | 峰开始   | 峰结束   | 面积%     |
|-----|---------|-------|----|---------|--------|-------|-------|---------|
| 1   | RT5.802 | 5.802 | 1  | 2168805 | 106949 | 5.225 | 6.433 | 97.6351 |
| 2   | RT7.353 | 7.353 | 2  | 52532   | 2984   | 7.150 | 7.675 | 2.3649  |

**5g:** (*R,E*)-4,4,4-trifluoro-1-phenyl-3-(*p*-tolyl)but-2-en-1-ol (HPLC: Chiracel OD-H, detected at 254 nm, eluent: n-hexane/2-propanol = 95/5, flow rate = 1.0 mL/min, 25 °C).

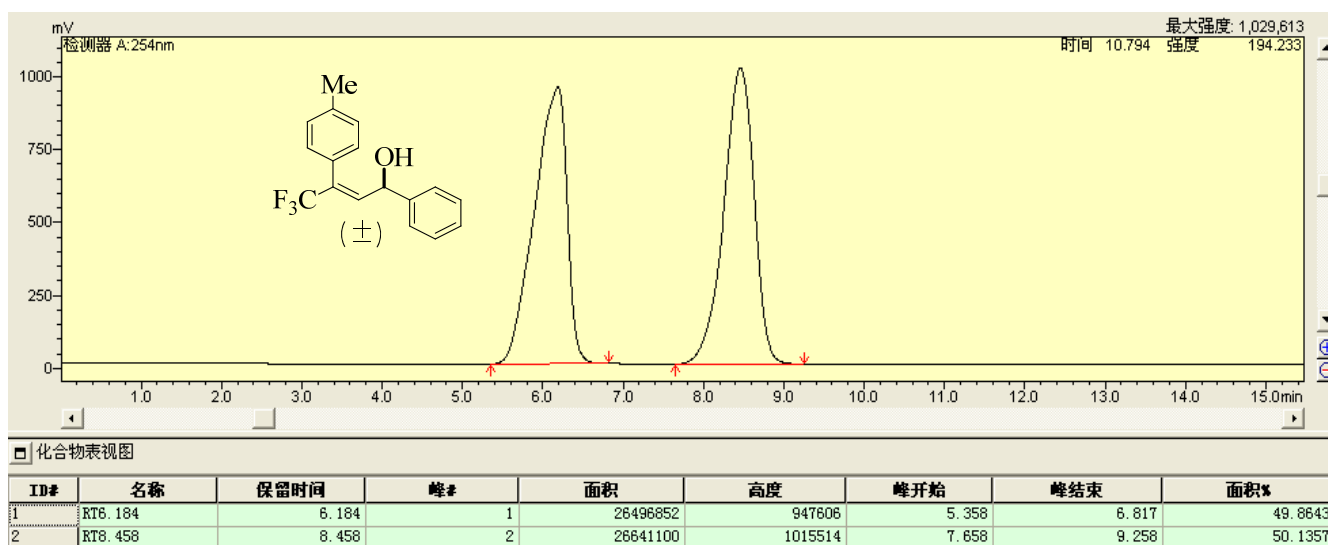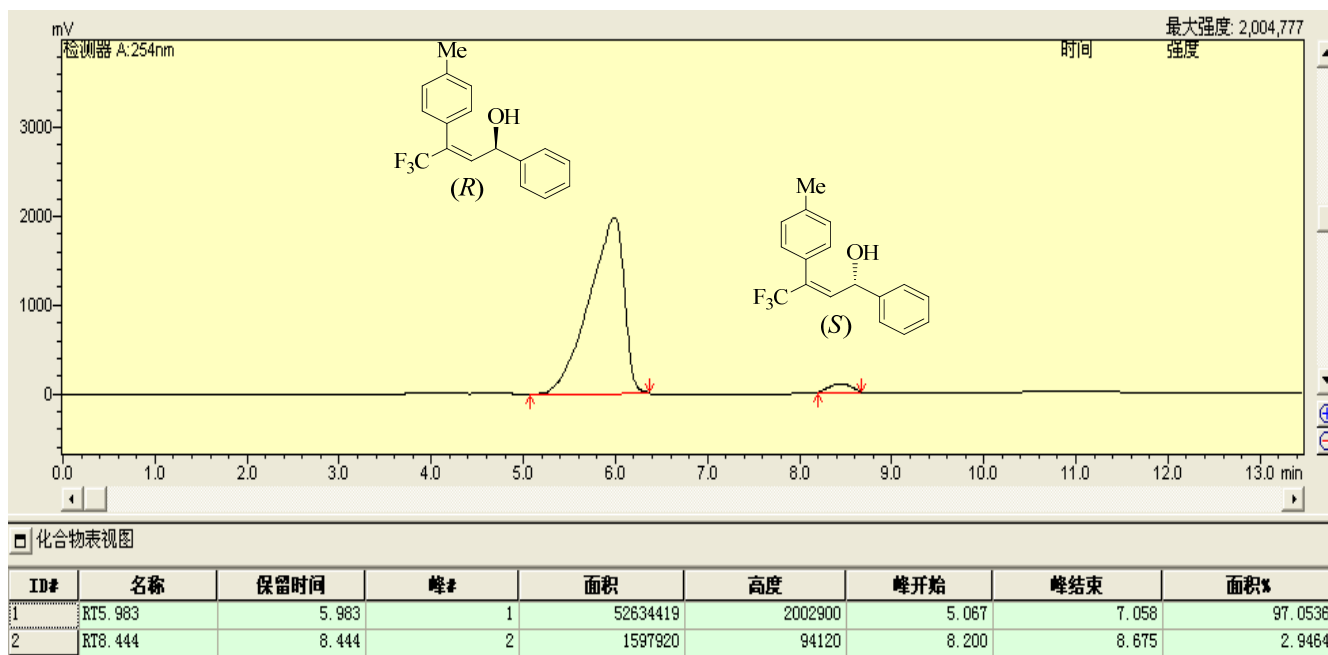

**5h:** (R,E)-4,4,4-trifluoro-3-(4-methoxyphenyl)-1-phenylbut-2-en-1-ol: (HPLC: ChiralcelOD-H, detected at 254 nm, eluent: n-hexane/2-propanol = 95/5, flow rate = 1.0 mL/min, 25 °C).

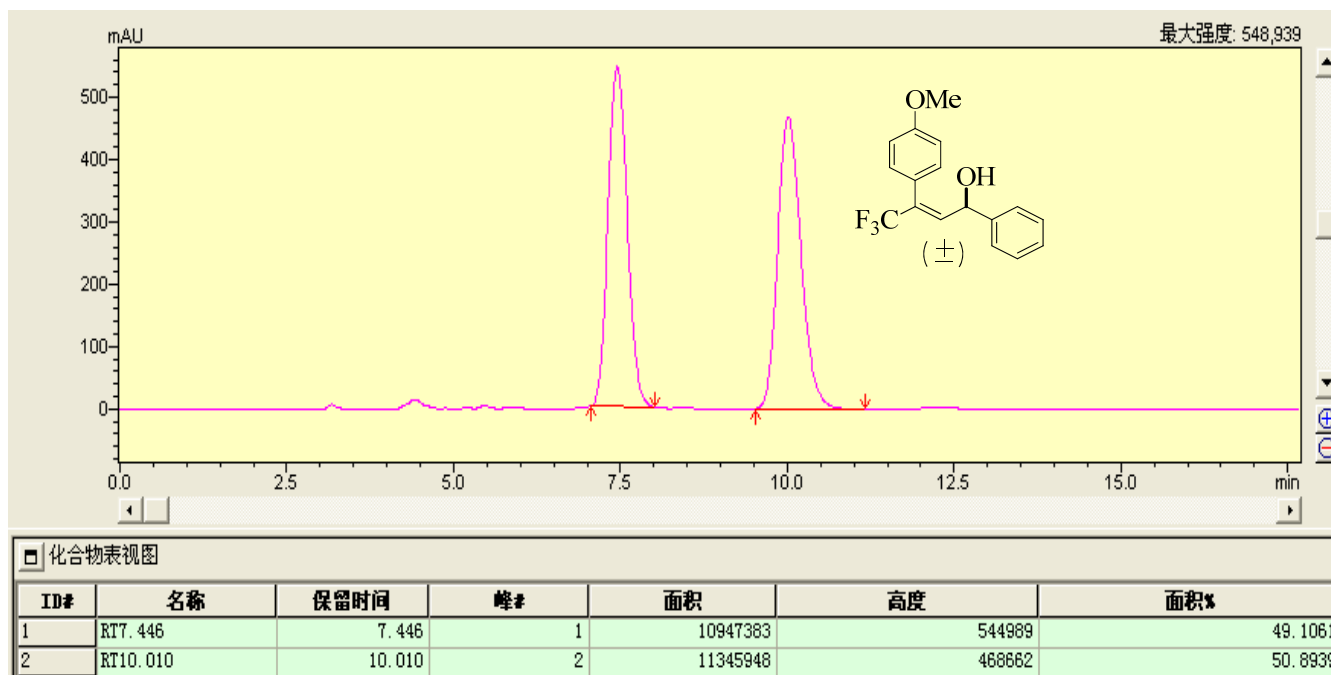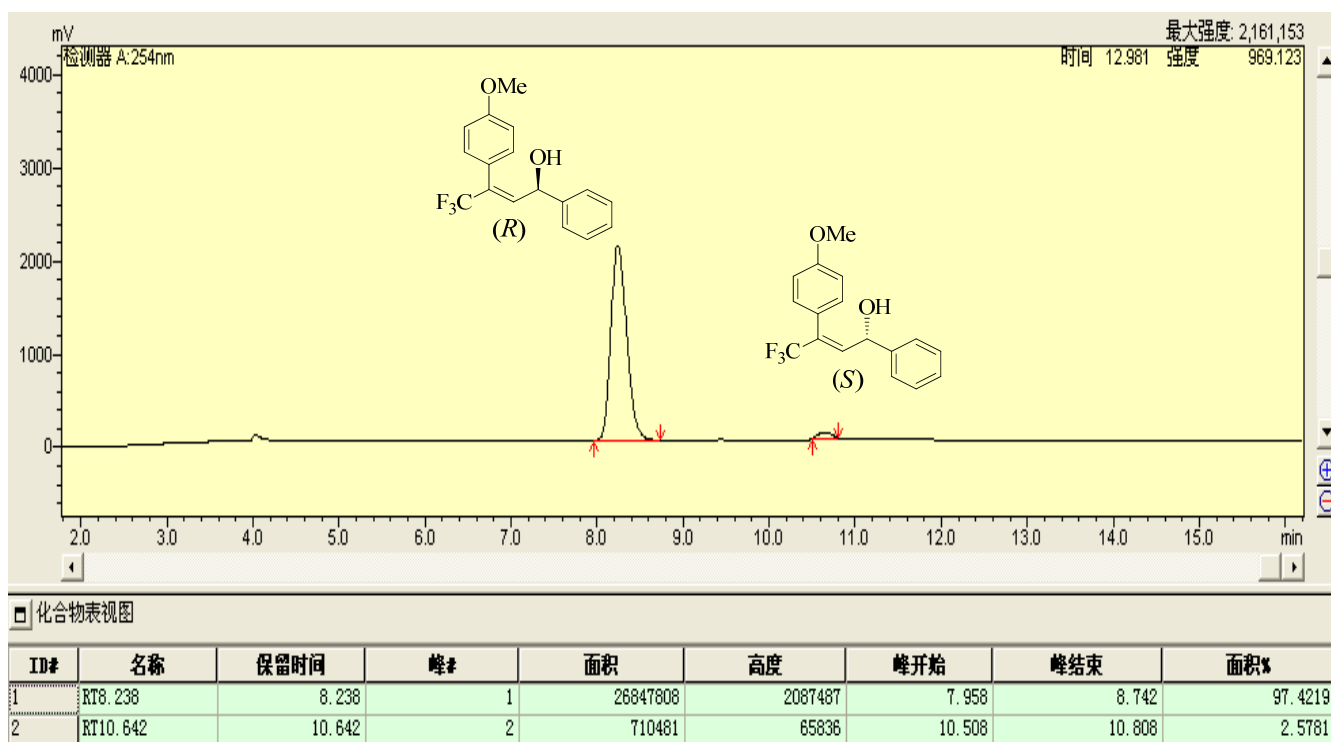

**5i: (R,E)-4,4,4-trifluoro-3-methyl-1-phenylbut-2-en-1-ol:** (HPLC: Chiralcel OD-H, detected at 254 nm, eluent: n-hexane/2-propanol = 95/5, flow rate = 1.0 mL/min, 25 °C).

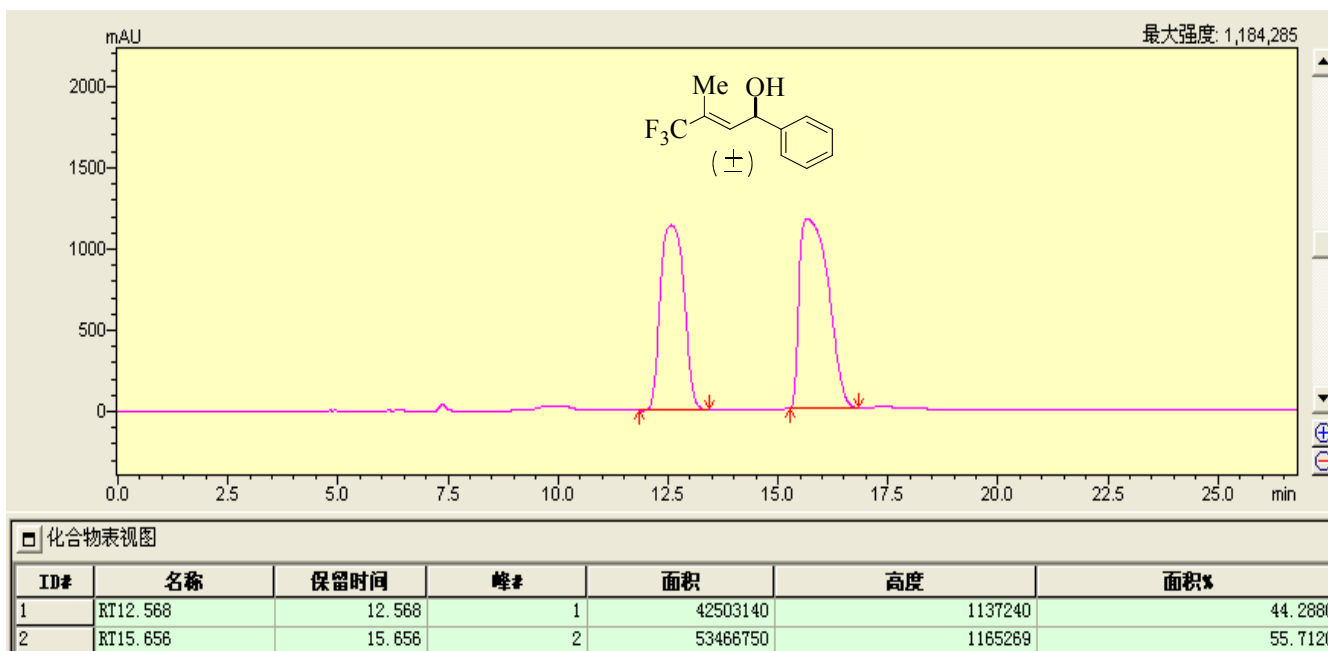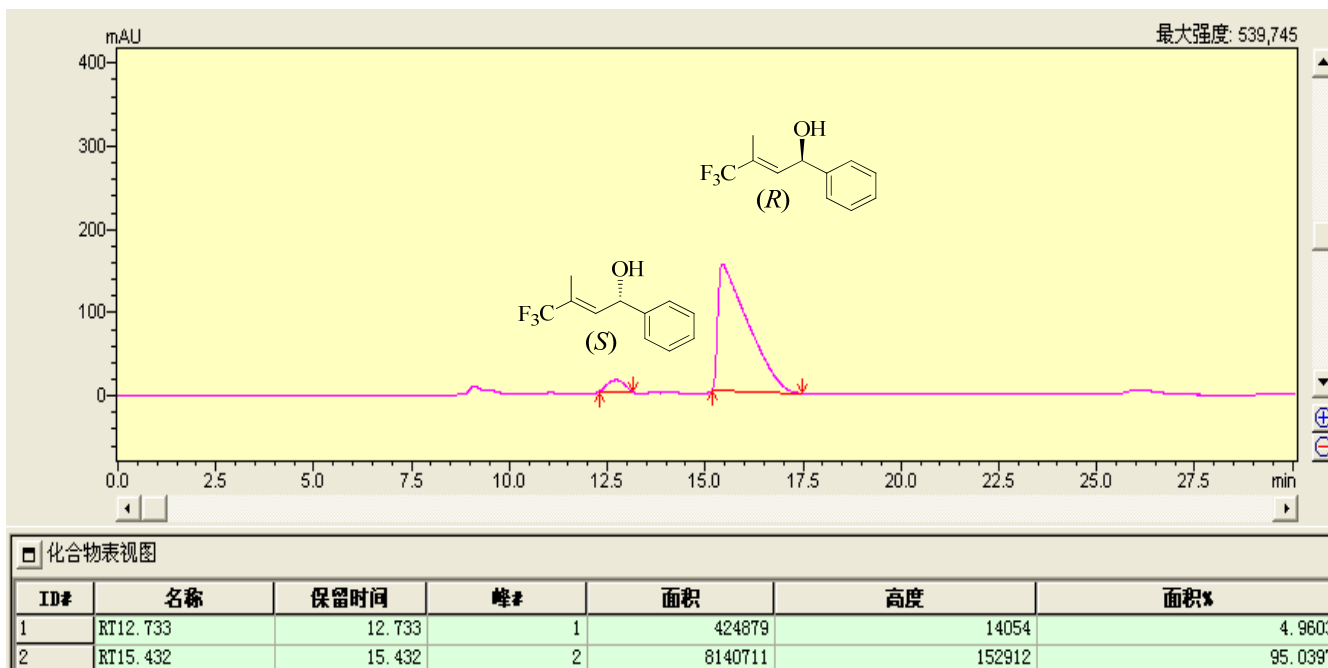

**5j: (R,E)-1-(4-chlorophenyl)-4,4,4-trifluoro-3-phenylbut-2-en-1-ol:** (HPLC: Chiracel OD-H, detected at 254 nm, eluent: n-hexane/2-propanol = 95/5, flow rate = 1.0 mL/min, 25 °C).

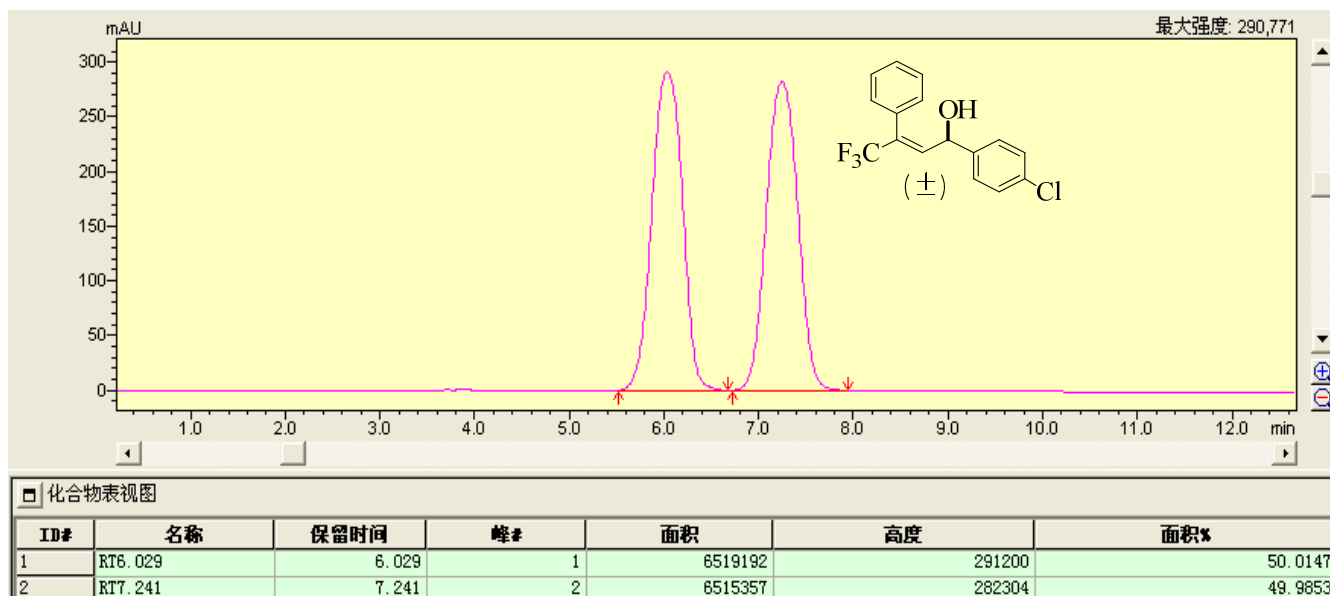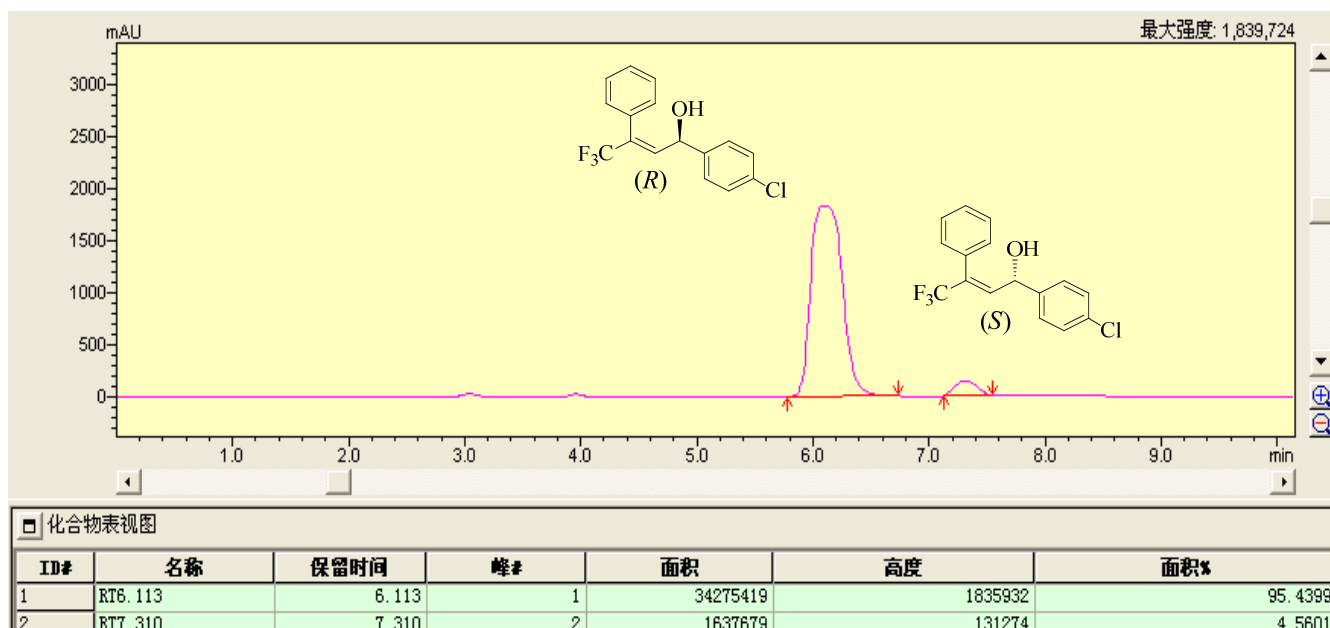



**5k: (R,E)-1-(4-bromophenyl)-4,4,4-trifluoro-3-phenylbut-2-en-1-ol:** (HPLC: Chiracel OD-H, detected at 254 nm, eluent: n-hexane/2-propanol = 95/5, flow rate = 1.0 mL/min, 25 °C).

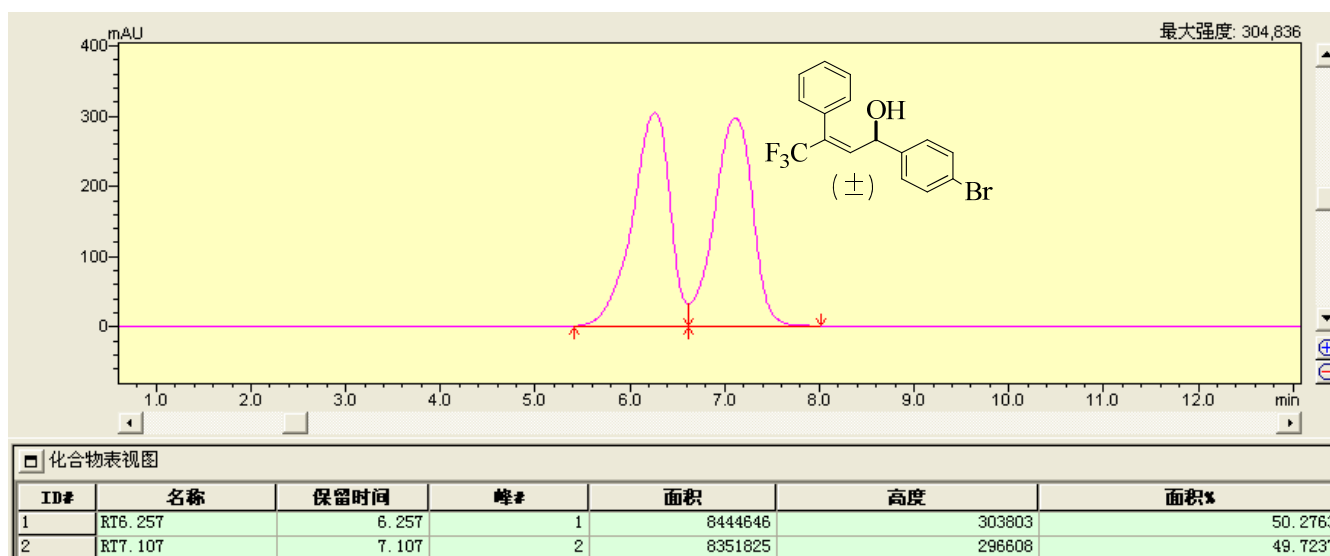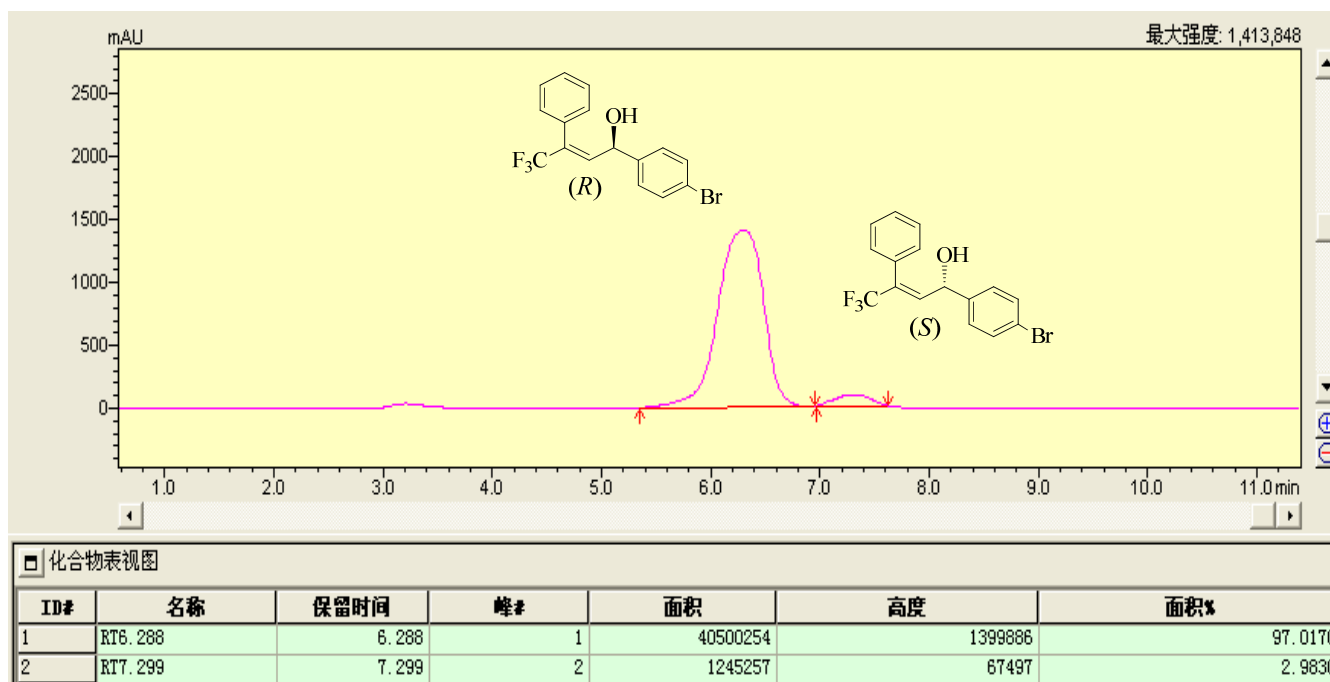

**5L: (R,E)-4,4,4-trifluoro-3-phenyl-1-(p-tolyl)but-2-en-1-ol: (HPLC: Chiracel OD-H, detected at 254 nm, eluent: n-hexane/2-propanol = 95/5, flow rate = 1.0 mL/min, 25 °C).**

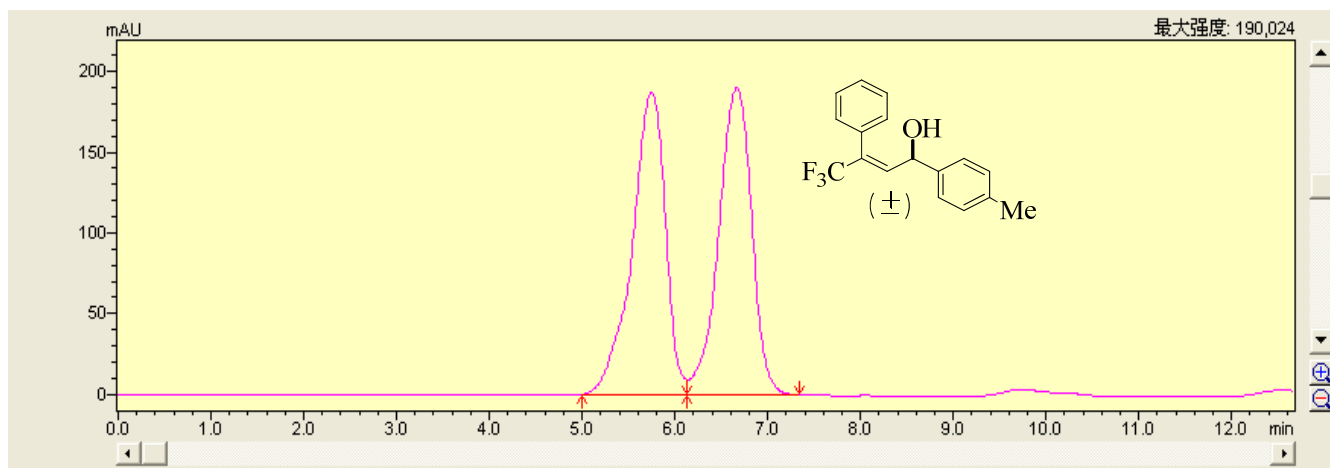

化合物表视图

| ID# | 名称      | 保留时间  | 峰# | 面积      | 高度     | 面积%     |
|-----|---------|-------|----|---------|--------|---------|
| 1   | RT5.743 | 5.743 | 1  | 4688000 | 187926 | 49.8019 |
| 2   | RT6.662 | 6.662 | 2  | 4725292 | 190637 | 50.1981 |

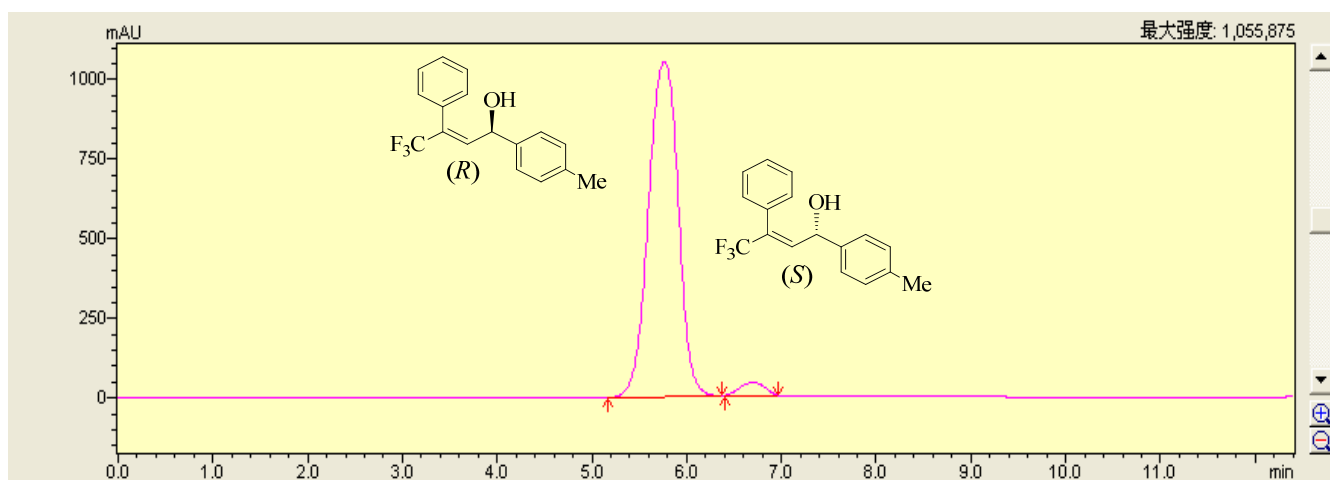

化合物表视图

| ID# | 名称      | 保留时间  | 峰# | 面积       | 高度      | 面积%     |
|-----|---------|-------|----|----------|---------|---------|
| 1   | RT5.759 | 5.759 | 1  | 22945012 | 1051230 | 97.0651 |
| 2   | RT6.695 | 6.695 | 2  | 693778   | 38988   | 2.9349  |

**5m: (R,E)-4,4,4-trifluoro-1-(4-methoxyphenyl)-3-phenylbut-2-en-1-ol:** (HPLC: Chiracel OD-H, detected at 254 nm, eluent: n-hexane/2-propanol = 95/5, flow rate = 1.0 mL/min, 25 °C).

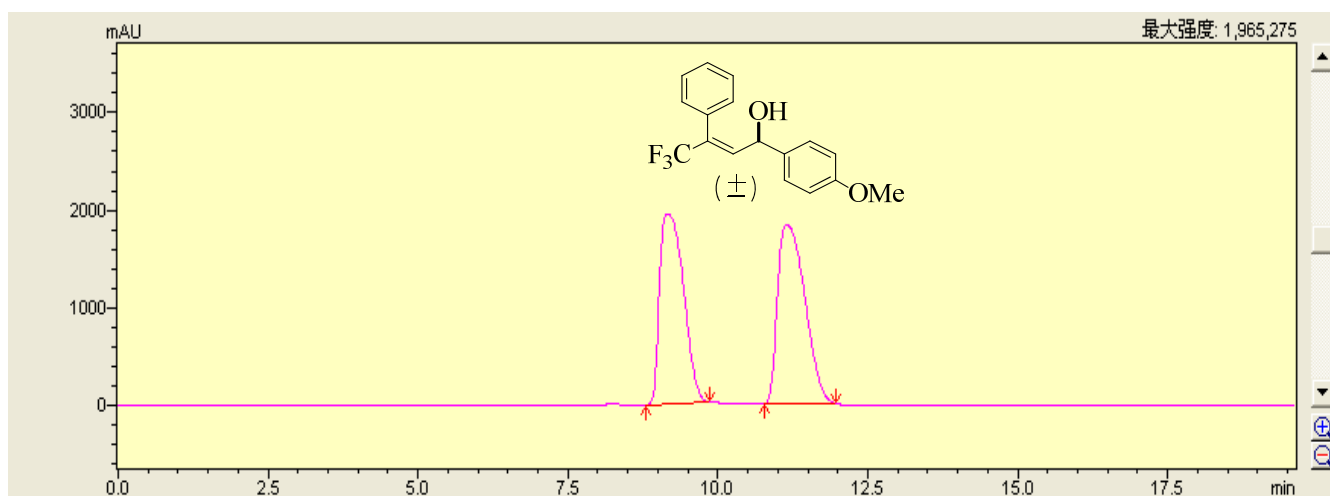

化合物表视图

| ID# | 名称       | 保留时间   | 峰# | 面积       | 高度      | 面积%     |
|-----|----------|--------|----|----------|---------|---------|
| 1   | RT9.160  | 9.160  | 1  | 54204047 | 1951779 | 48.2621 |
| 2   | RT11.144 | 11.144 | 2  | 58107807 | 1834026 | 51.7379 |

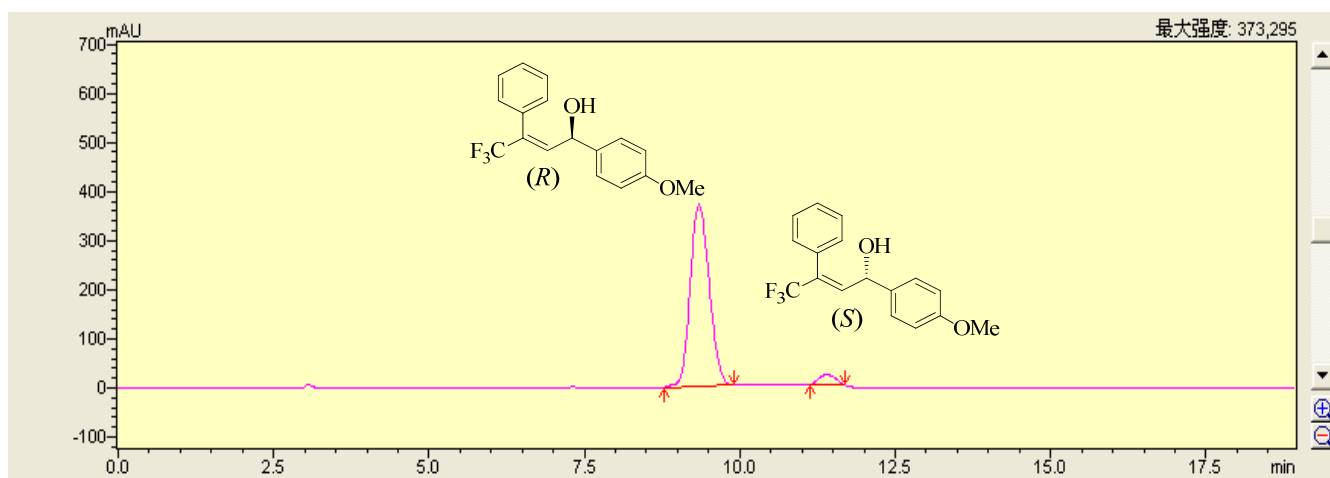

化合物表视图

| ID# | 名称       | 保留时间   | 峰# | 面积      | 高度     | 面积%     |
|-----|----------|--------|----|---------|--------|---------|
| 1   | RT9.340  | 9.340  | 1  | 7883068 | 369793 | 94.9681 |
| 2   | RT11.397 | 11.397 | 2  | 417688  | 21536  | 5.0319  |

**5n: (R,E)-1-(3-chlorophenyl)-4,4,4-trifluoro-3-phenylbut-2-en-1-ol** (HPLC: Chiracel AD-H, detected at 254 nm, eluent: n-hexane/2-propanol = 95/5, flow rate = 1.0 mL/min, 25 °C).

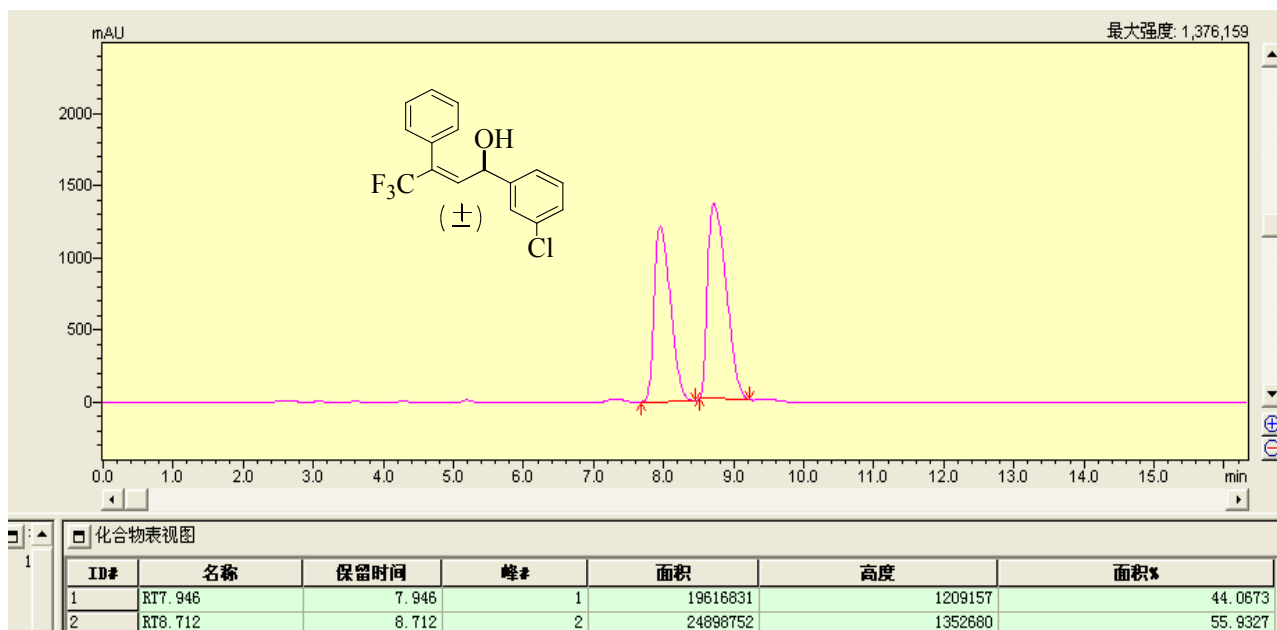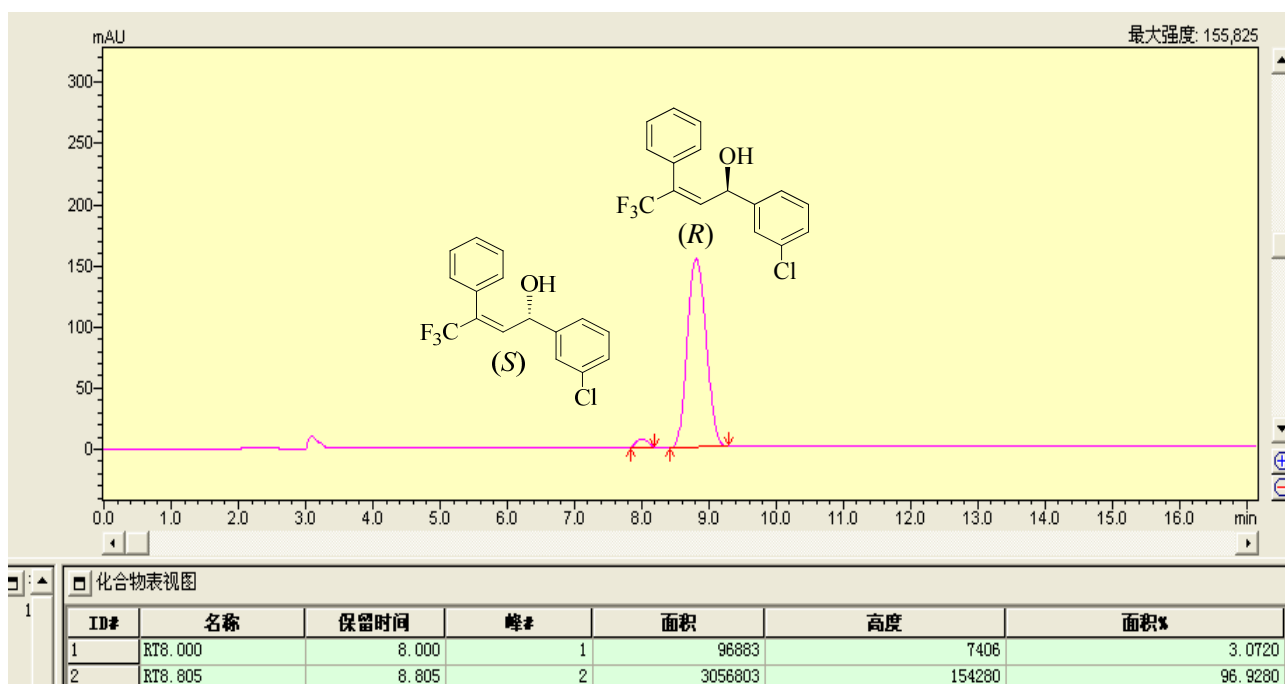

**5o:** (*R,E*)-1-(3-bromophenyl)-4,4,4-trifluoro-3-phenylbut-2-en-1-ol (HPLC: Chiralcel AD-H, detected at 254 nm, eluent: n-hexane/2-propanol = 95/5, flow rate = 1.0 mL/min, 25 °C).

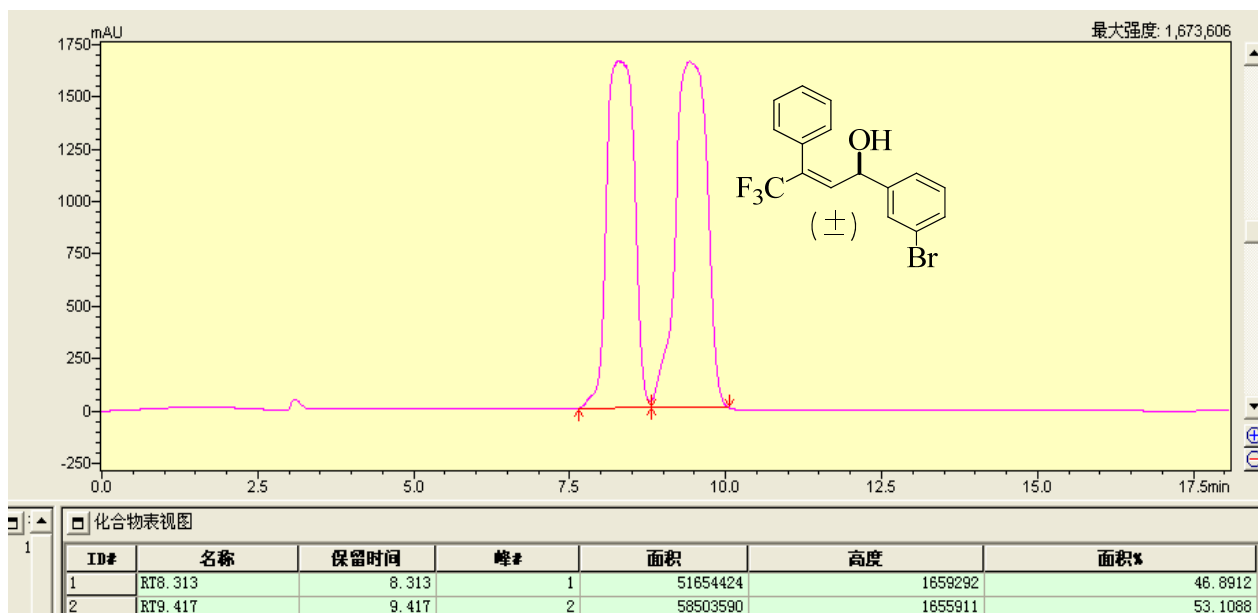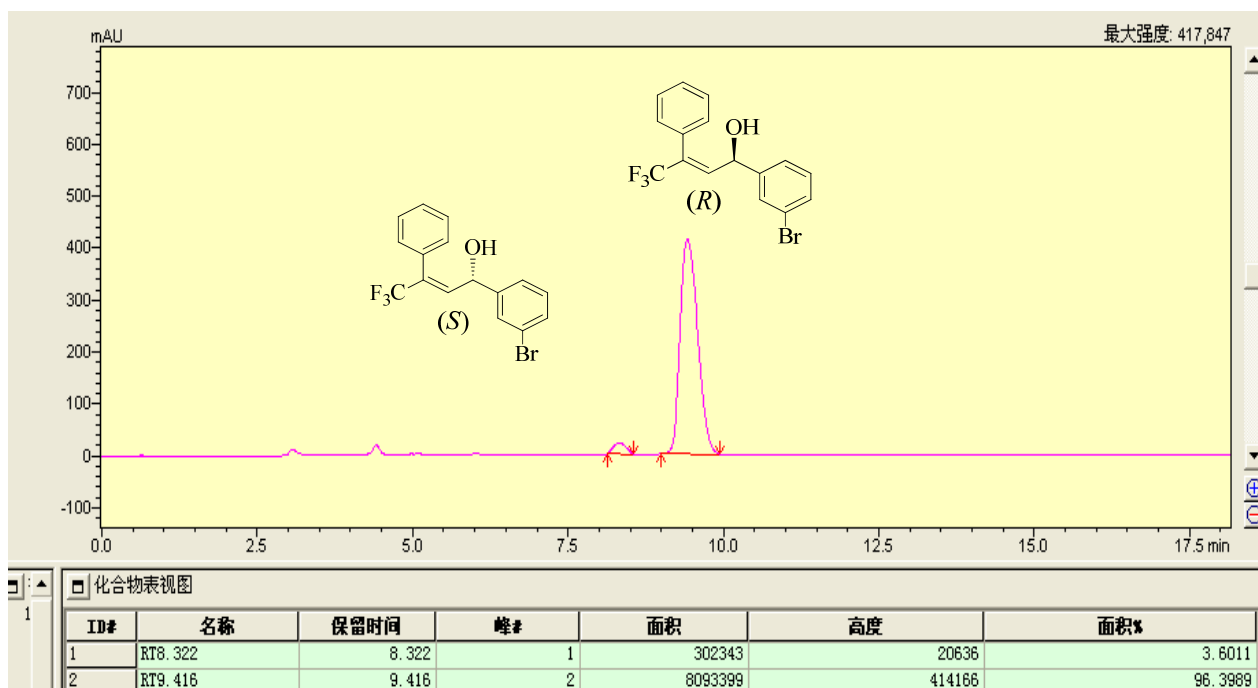

**5p:** (*R,E*)-4,4,4-trifluoro-1-(2-methoxyphenyl)-3-phenylbut-2-en-1-ol (HPLC: Chiracel OD-H, detected at 254 nm, eluent: n-hexane/2-propanol = 97/3, flow rate = 1.0 mL/min, 25 °C).

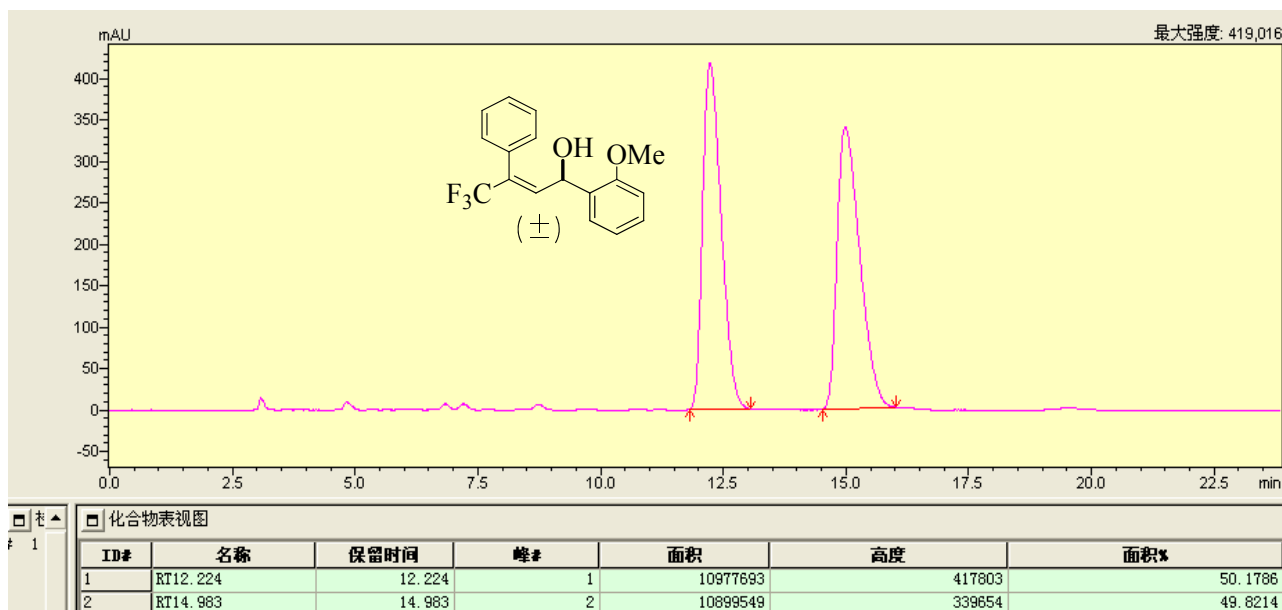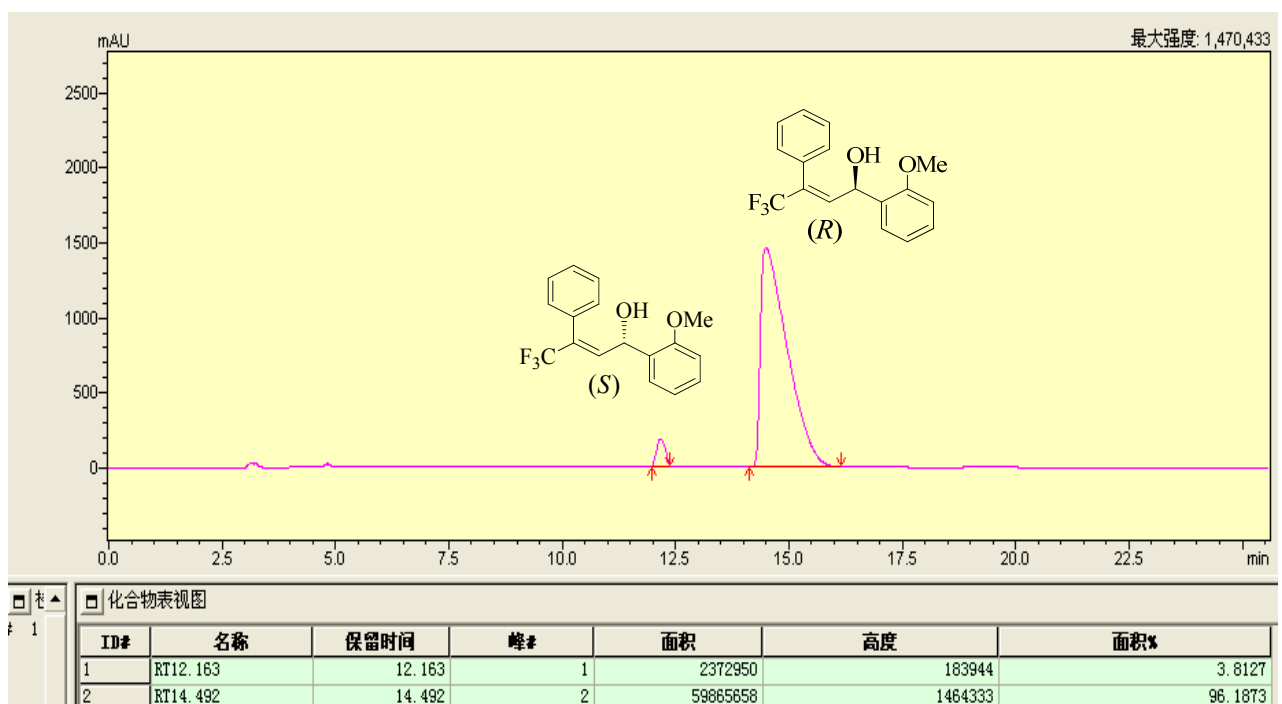

**5q: (R,E)-1-(4-bromophenyl)-4,4,4-trifluoro-3-(4-fluorophenyl)but-2-en-1-ol:** (HPLC: Chiracel OD-H, detected at 254 nm, eluent: n-hexane/2-propanol = 95/5, flow rate = 1.0 mL/min, 25 °C).

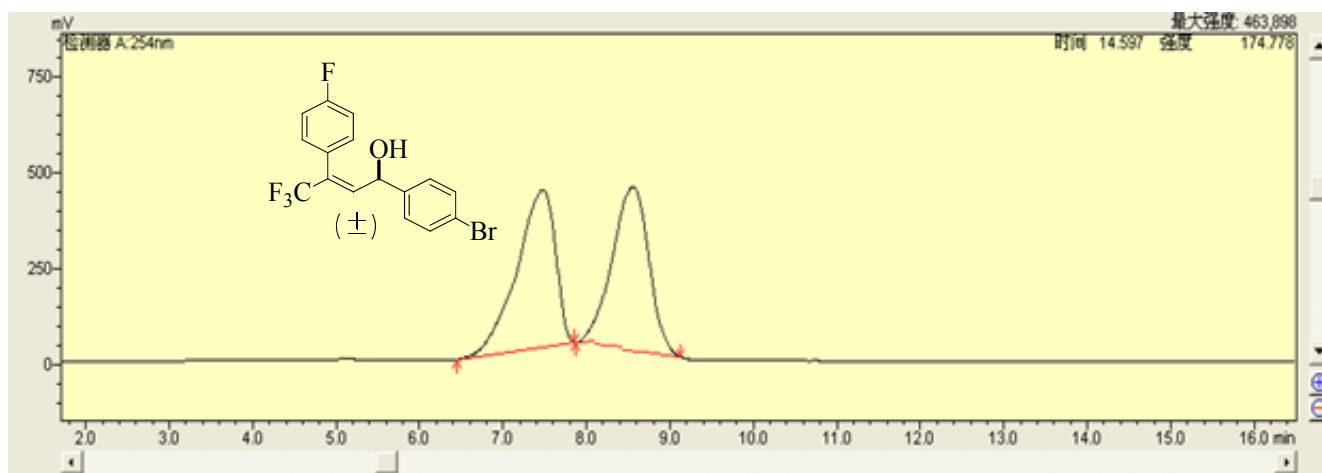

化合物表视图

| ID# | 名称      | 保留时间  | 峰# | 面积       | 高度     | 峰开始   | 峰结束   | 面积%     |
|-----|---------|-------|----|----------|--------|-------|-------|---------|
| 1   | RT7.471 | 7.471 | 1  | 13250338 | 411542 | 6.450 | 7.858 | 53.6715 |
| 2   | RT8.548 | 8.548 | 2  | 11437513 | 396518 | 7.875 | 8.983 | 46.3285 |

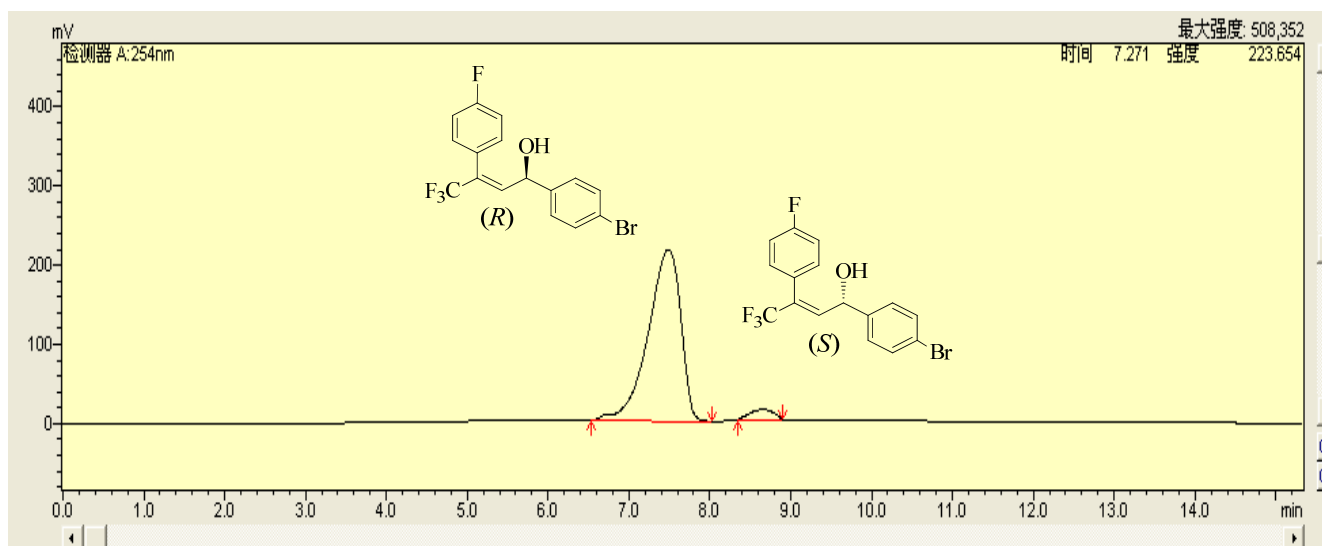

化合物表视图

| ID# | 名称      | 保留时间  | 峰# | 面积      | 高度     | 峰开始   | 峰结束   | 面积%     |
|-----|---------|-------|----|---------|--------|-------|-------|---------|
| 1   | RT7.481 | 7.481 | 1  | 6043868 | 216566 | 6.533 | 8.033 | 95.7932 |
| 2   | RT8.648 | 8.648 | 2  | 265422  | 12728  | 8.342 | 8.908 | 4.2068  |

**5r:** (*R,E*)-1,3-bis(4-bromophenyl)-4,4-trifluorobut-2-en-1-ol: (HPLC: Chiracel OD-H, detected at 254 nm, eluent: n-hexane/2-propanol = 95/5, flow rate = 1.0 mL/min, 25 °C).

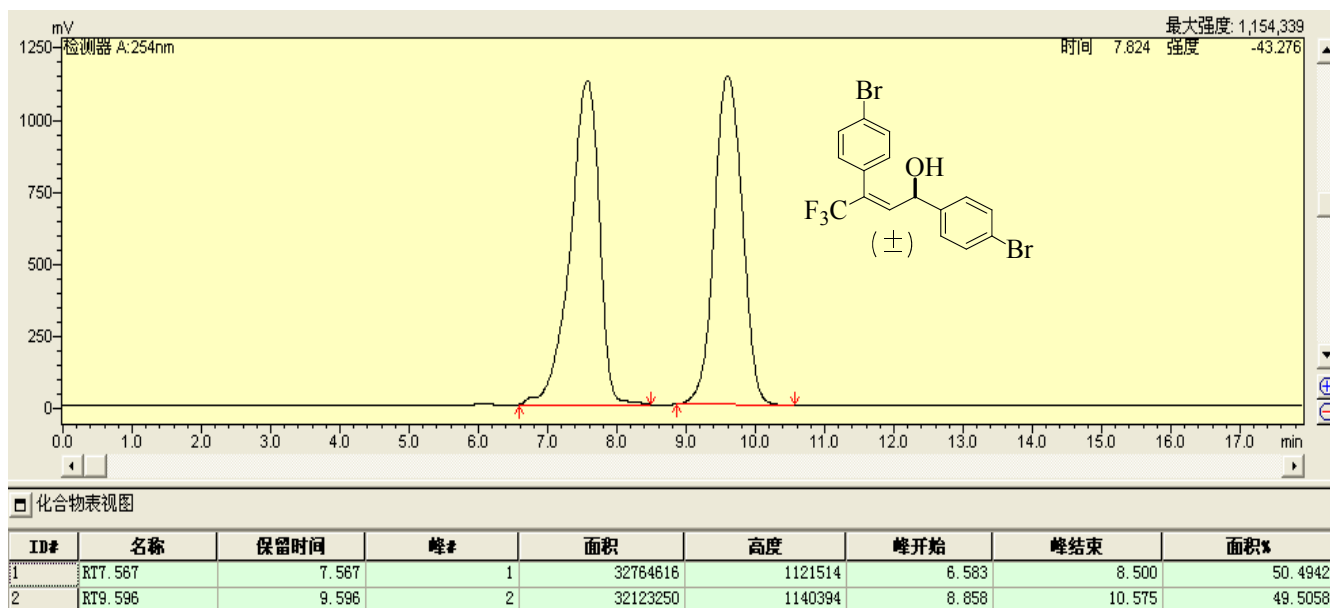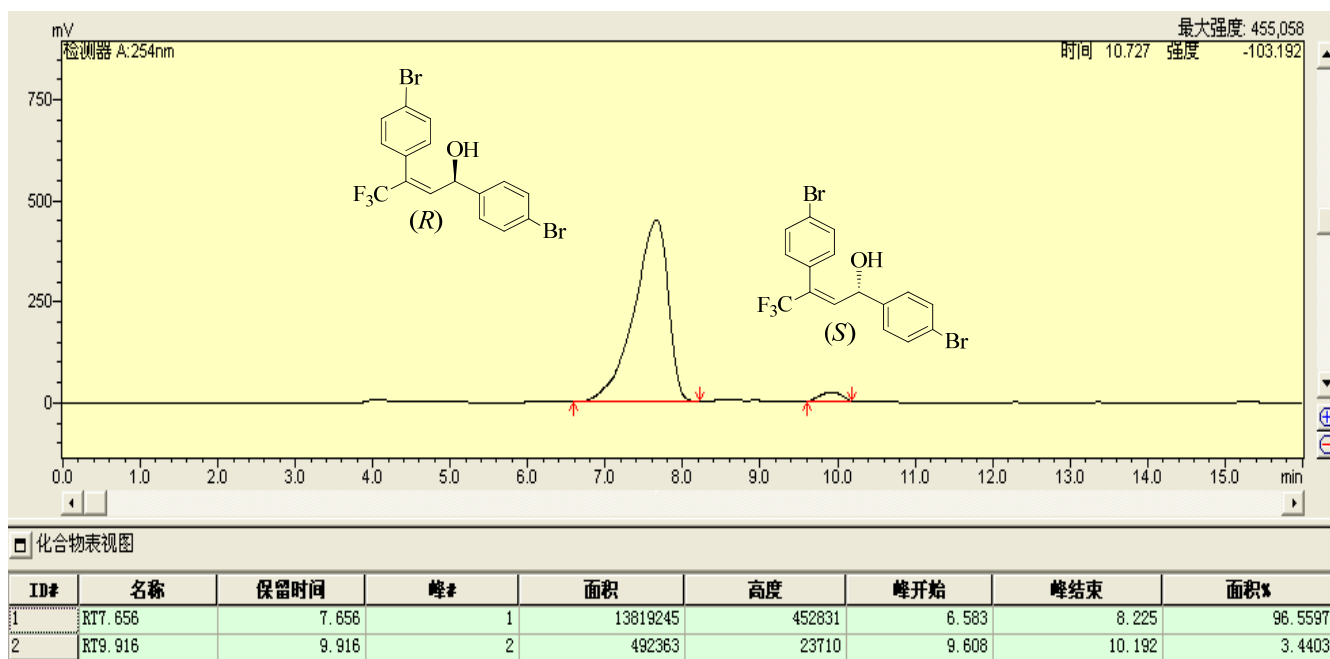



**Figure S6.** Reusability of catalyst **3** for enantioselective reduction of 4,4,4-trifluoro-1,3-diphenylbut-2-enone to (*R*)-4,4,4-trifluoro-1,3-diphenylbut-2-enol.

Recycle 2.

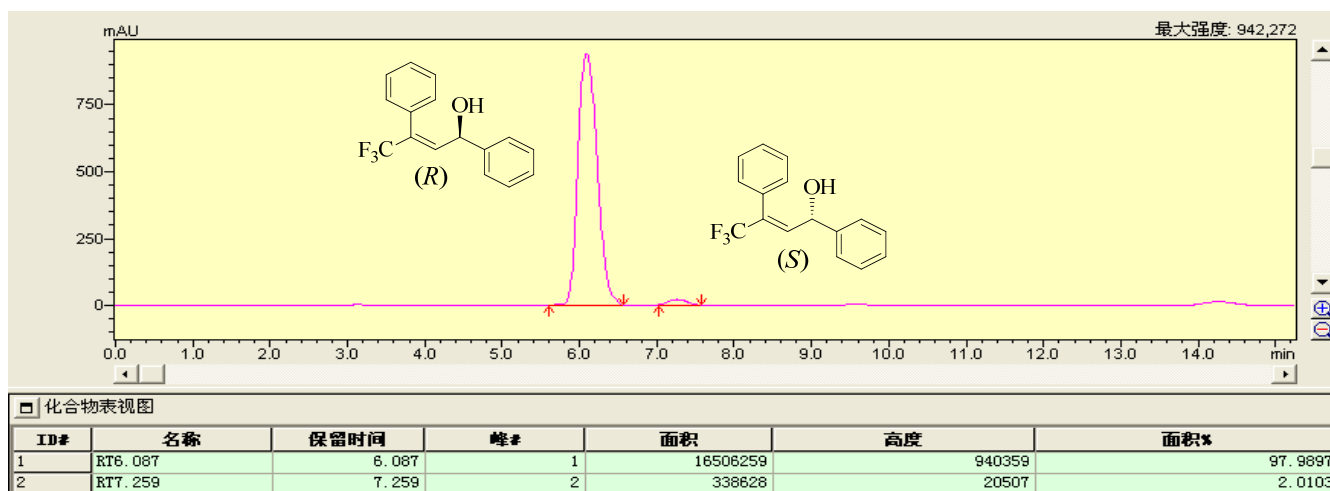

Recycle3

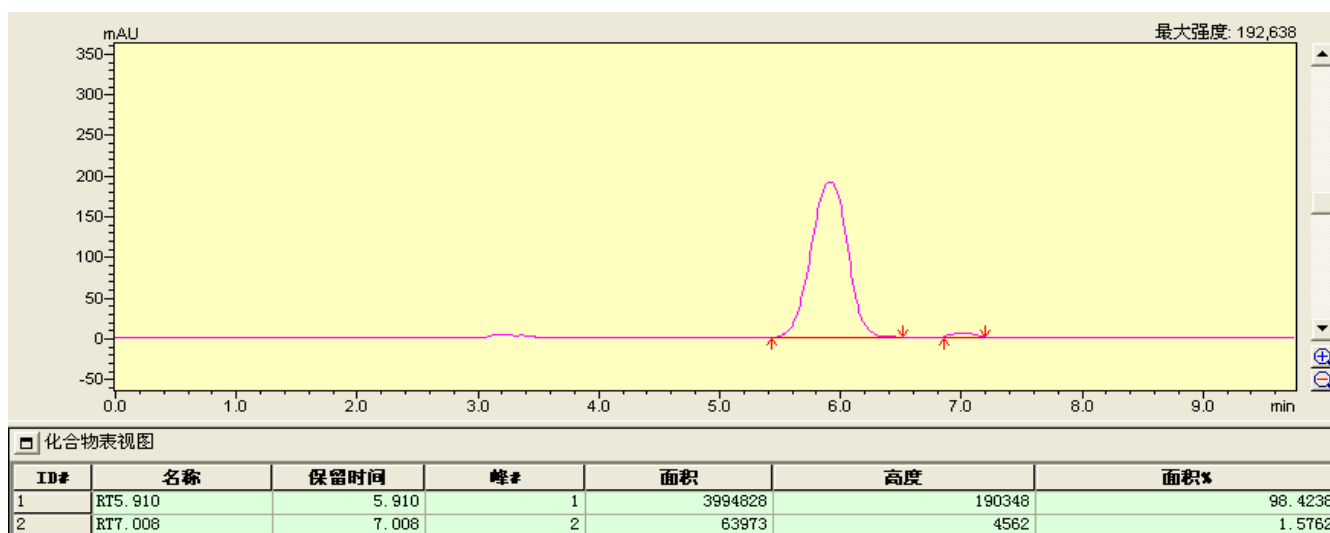

Recycle4

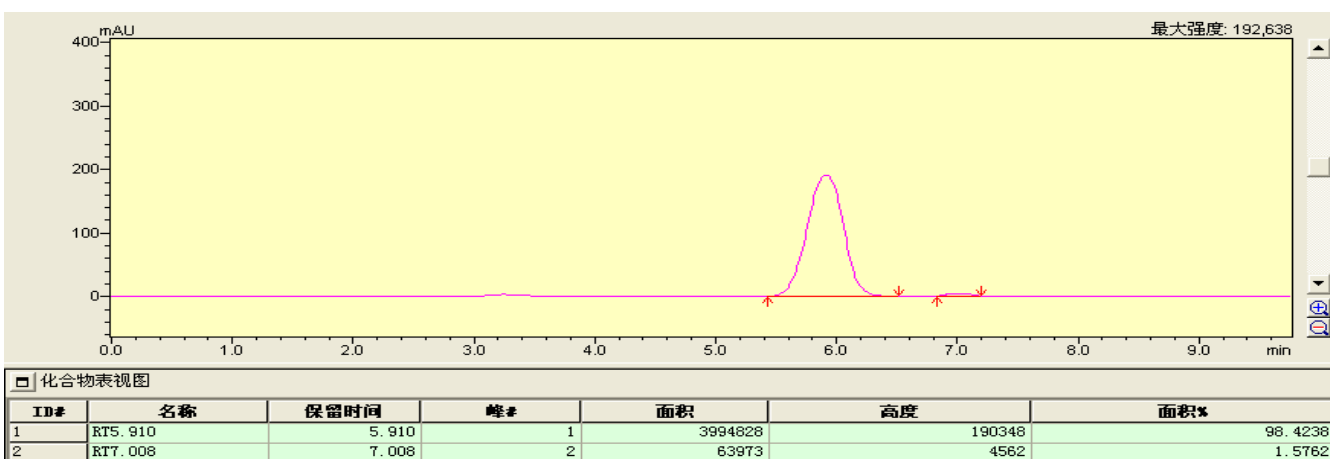

### Recycle5

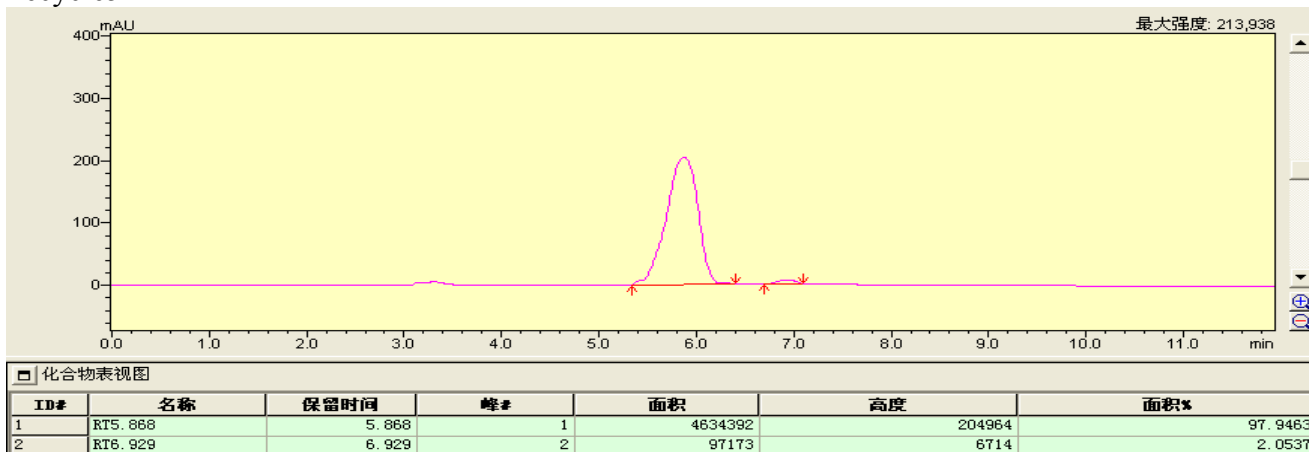

### Recycle6

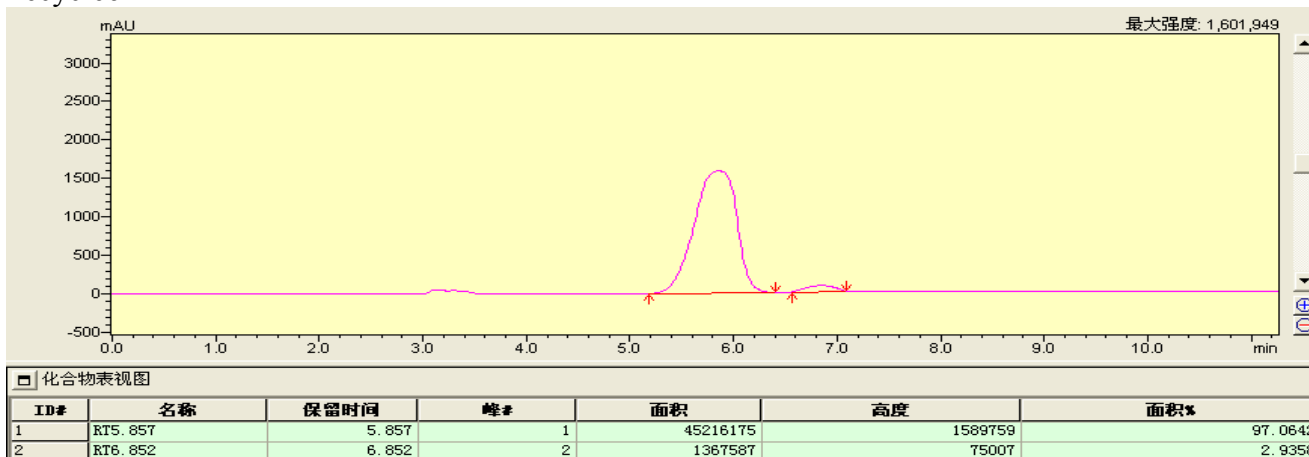

### Recycle7

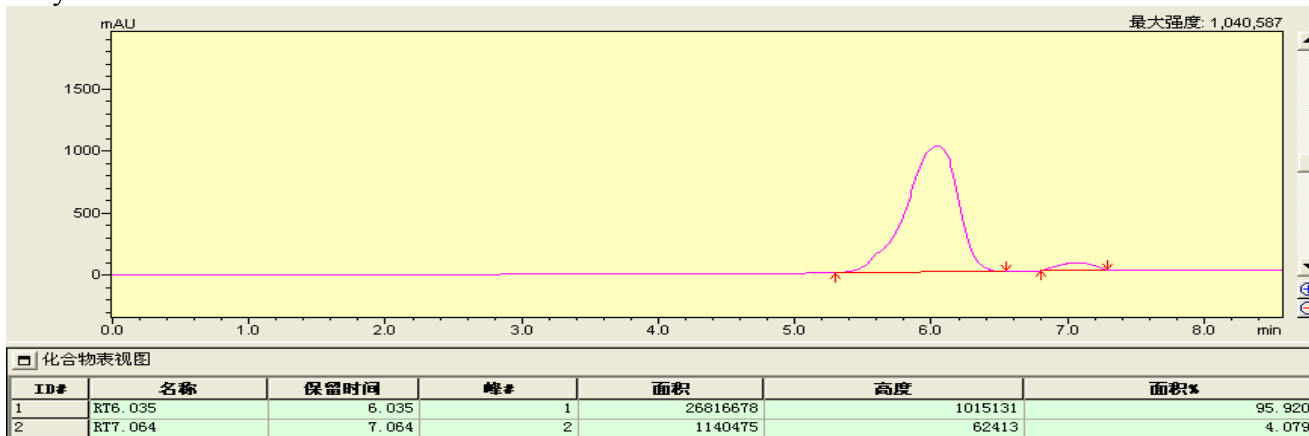

### Recycle8

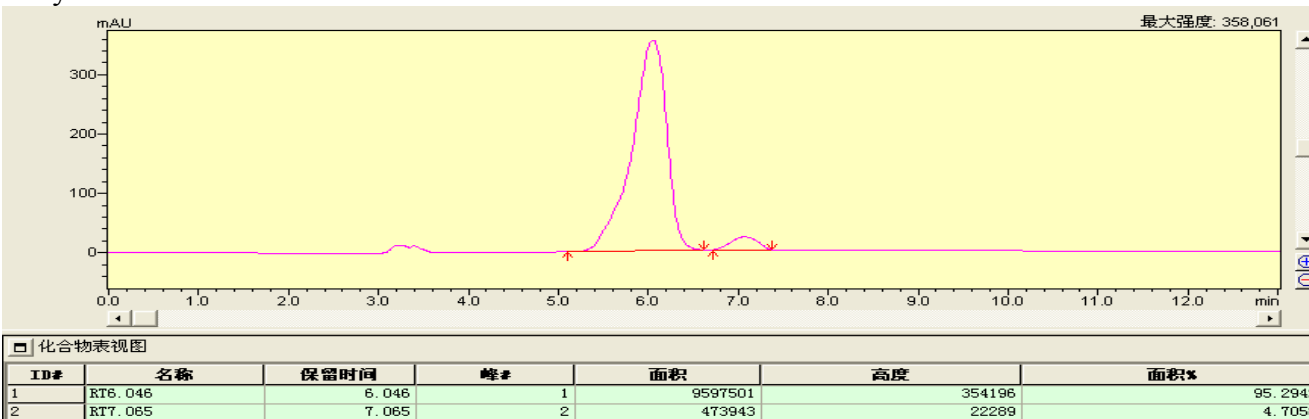

**Figure S7.**  $^1\text{H-NMR}$ ,  $^{13}\text{C-NMR}$  and GC-MS of all chiral products.

**6a: (R)-4,4,4-Trifluoro-1,3-diphenylbutan-1-one**

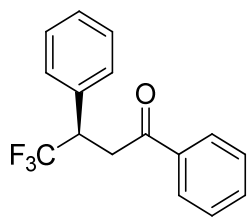

Yield: 96% (97% ee, 100% es);  $^1\text{H NMR}$  (400 MHz,  $\text{CDCl}_3$ ):  $\delta$  3.52 (dd, 1H,  $J = 18$  Hz,  $J = 4.5$  Hz), 3.64 (dd, 1H,  $J = 18$  Hz,  $J = 4.5$  Hz), 4.18-4.29 (m, 1H), 7.21-7.96 (m, 10H);  $^{13}\text{C NMR}$  (100 MHz,  $\text{CDCl}_3$ ):  $\delta$  38.5 (q,  $J = 2$  Hz), 44.9 (q,  $J = 27.7$  Hz), 127.2 (q,  $J = 280$  Hz), 128.3, 128.5, 128.9, 129.0, 129.2, 133.8, 134.8 (q,  $J = 2$  Hz), 136.5, 195.5; GC/MS (m/z): 278.09; HPLC (OD-H, elute: *n*-hexanes/*i*-PrOH = 95/5, detector: 254 nm, flow rate: 1.0 mL/min, 25 °C)  $t_1 = 5.1$  min,  $t_2 = 6.6$  min.

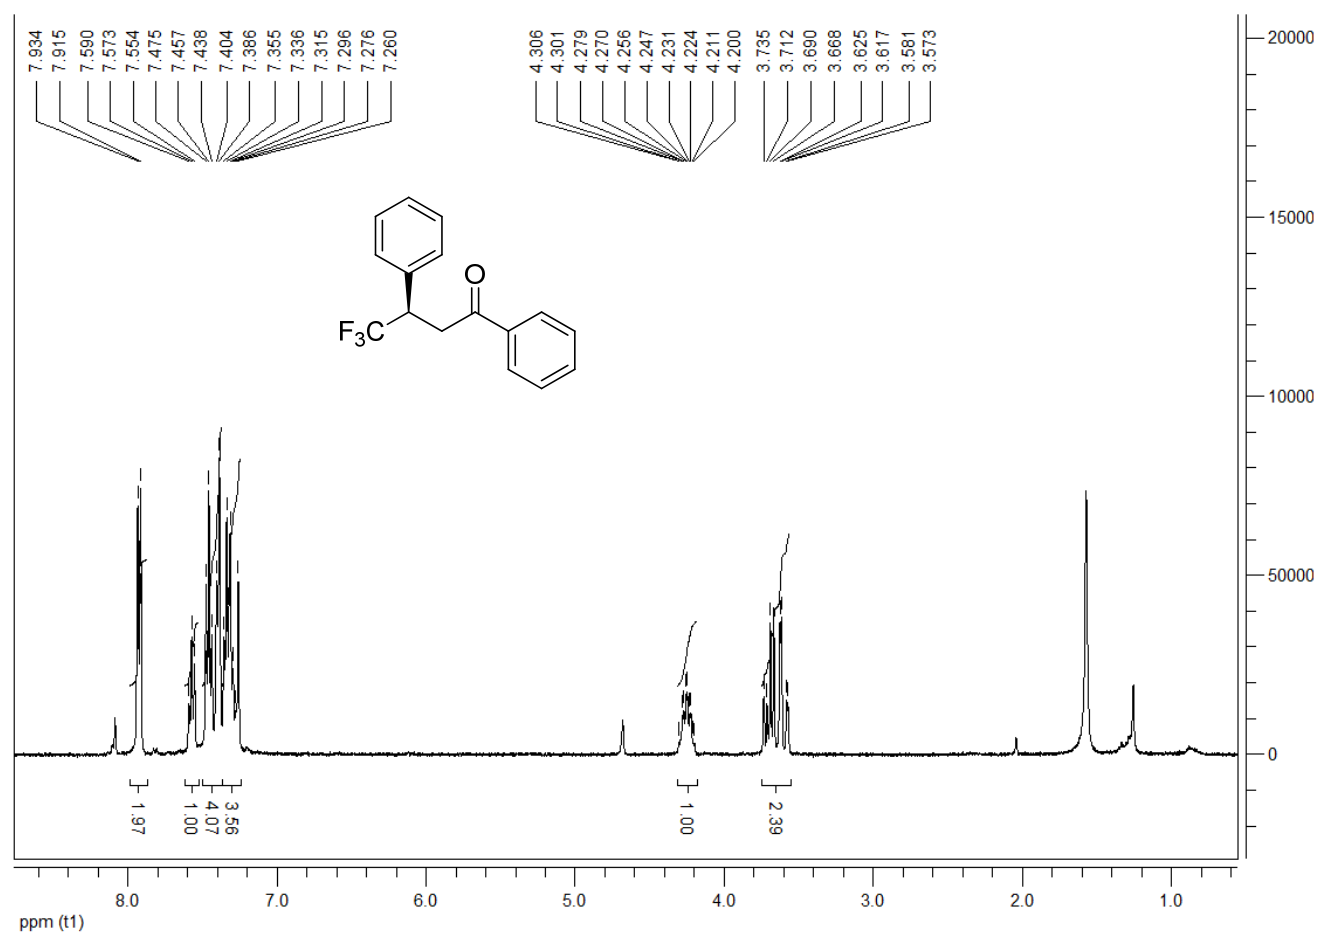

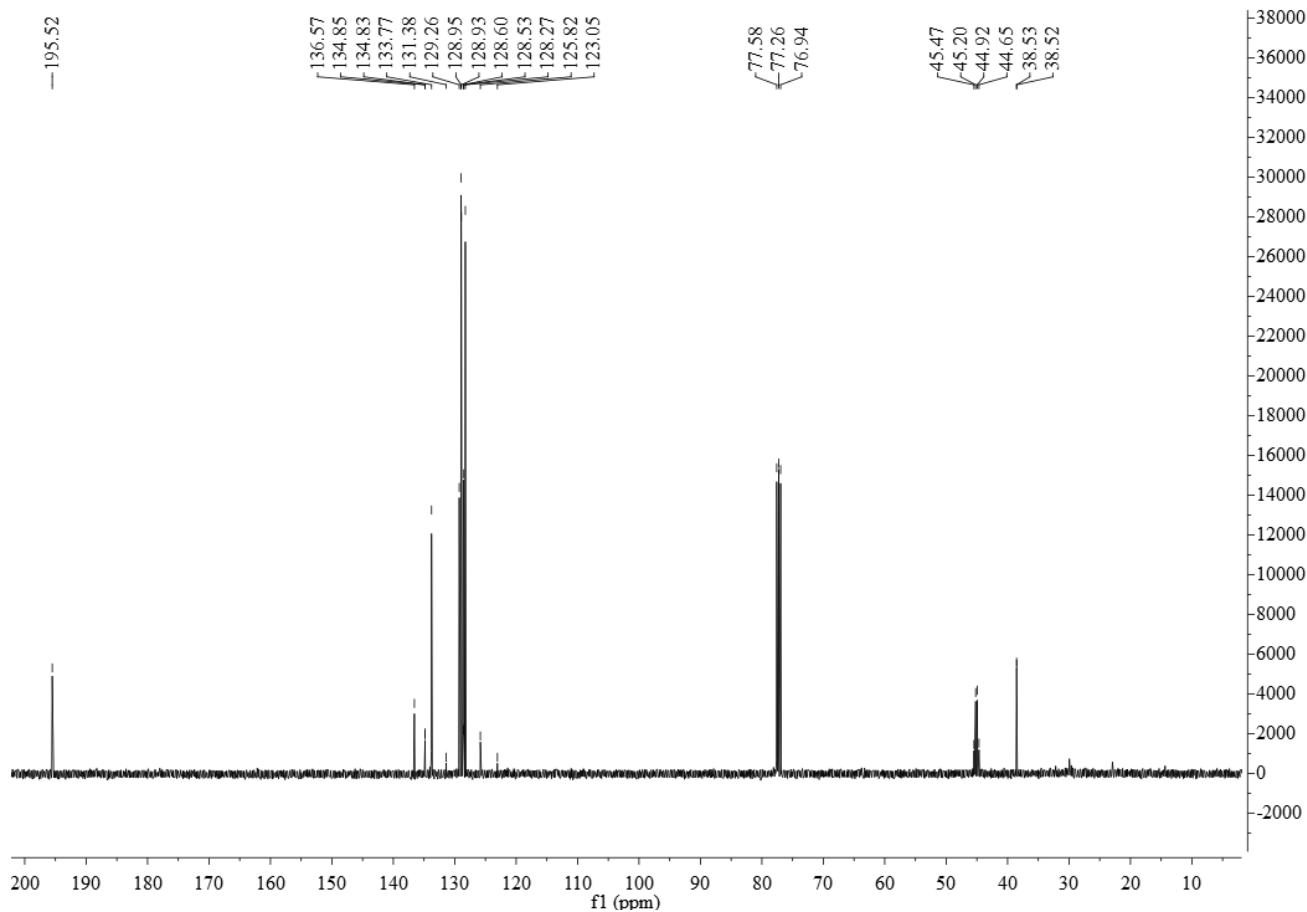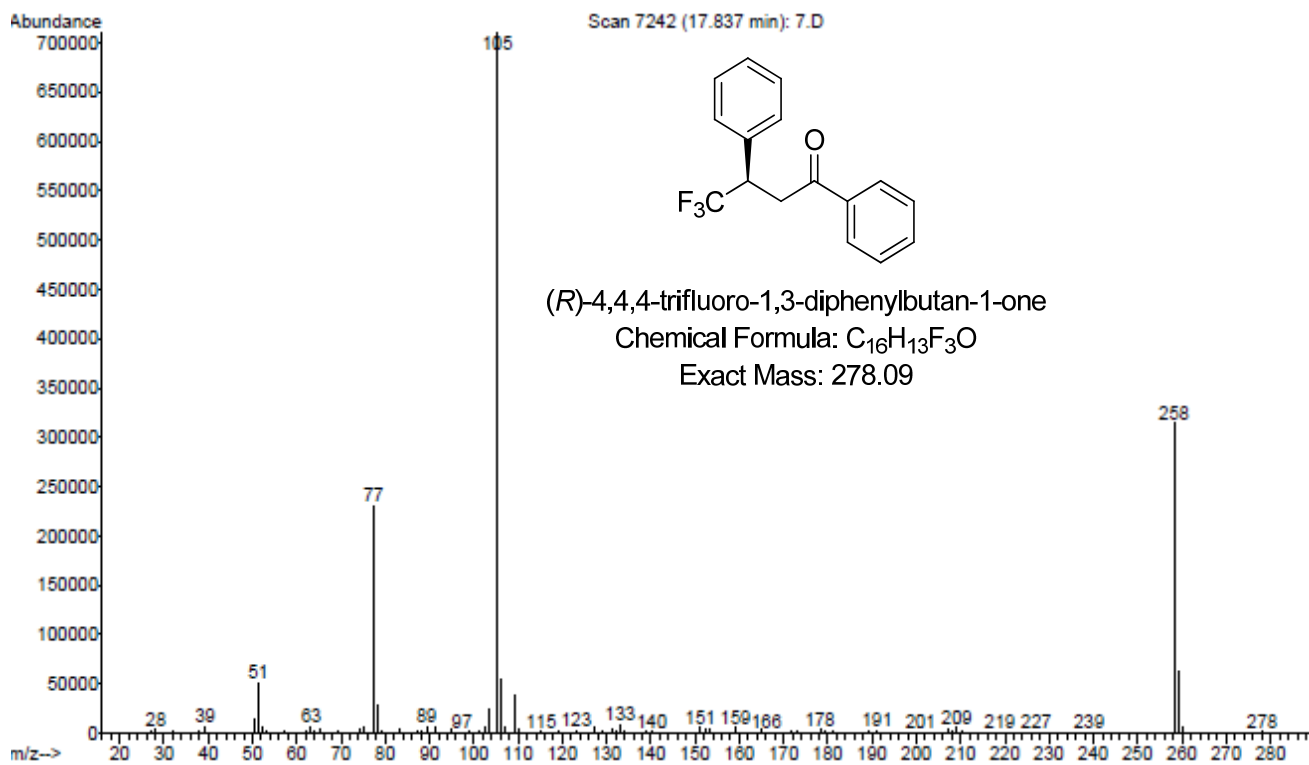

**6b: (R)-4,4,4-Trifluoro-3-(4-fluorophenyl)-1-phenylbutan-1-one**

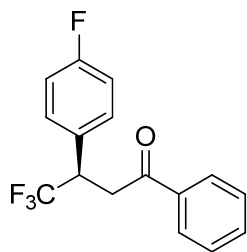

Yield: 96% (92% ee, 98% es);  $^1\text{H}$  NMR (400 MHz,  $\text{CDCl}_3$ ):  $\delta$  3.51 (dd,  $J = 3.99$ , 17.76 Hz, 1H), 3.59 (dd,  $J = 9.40$ , 17.76 Hz, 1H), 4.22–4.30 (m, 1H), 7.04–7.13 (m, 2H), 7.24–7.65 (m, 5H), 7.83–7.85 (m, 2H);  $^{13}\text{C}$  NMR (100 MHz,  $\text{CDCl}_3$ ):  $\delta$  38.3 (q,  $J = 2$  Hz), 44.2 (q,  $J = 28$  Hz), 115.7 (d,  $J = 21$  Hz), 126.3 (q,  $J = 278.4$  Hz), 128.0, 128.8, 130.6, 130.7, 133.7, 136.2, 162.6 (d,  $J = 246.1$  Hz), 195.1; GC/MS (m/z): 296.08; HPLC (OD-H, elute: *n*-hexanes/*i*-PrOH = 95/5, detector: 254 nm, flow rate: 1.0 mL/min, 25 °C)  $t_1 = 5.2$  min,  $t_2 = 6.1$  min.

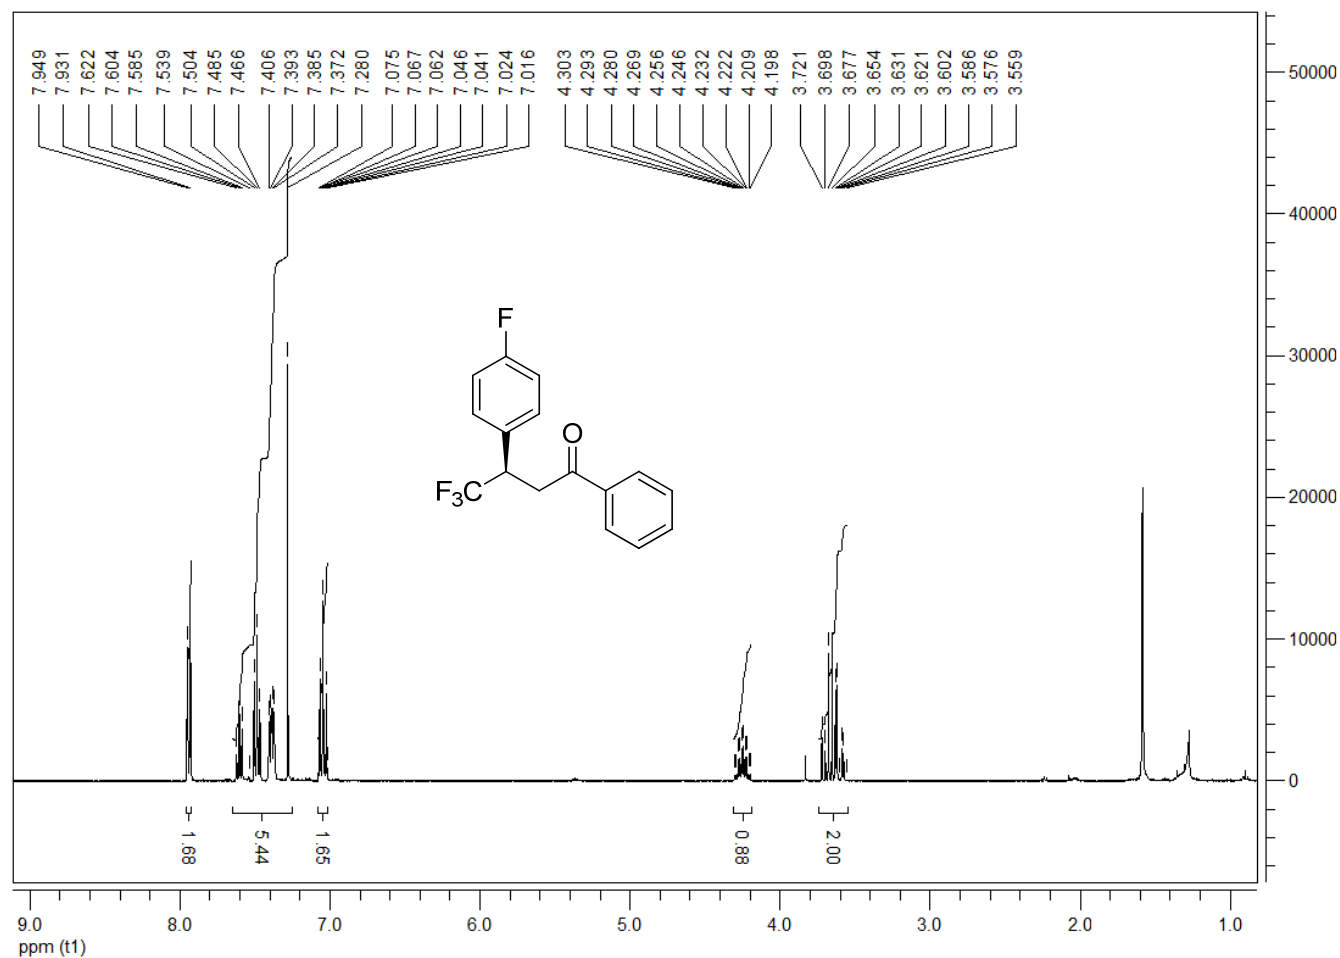

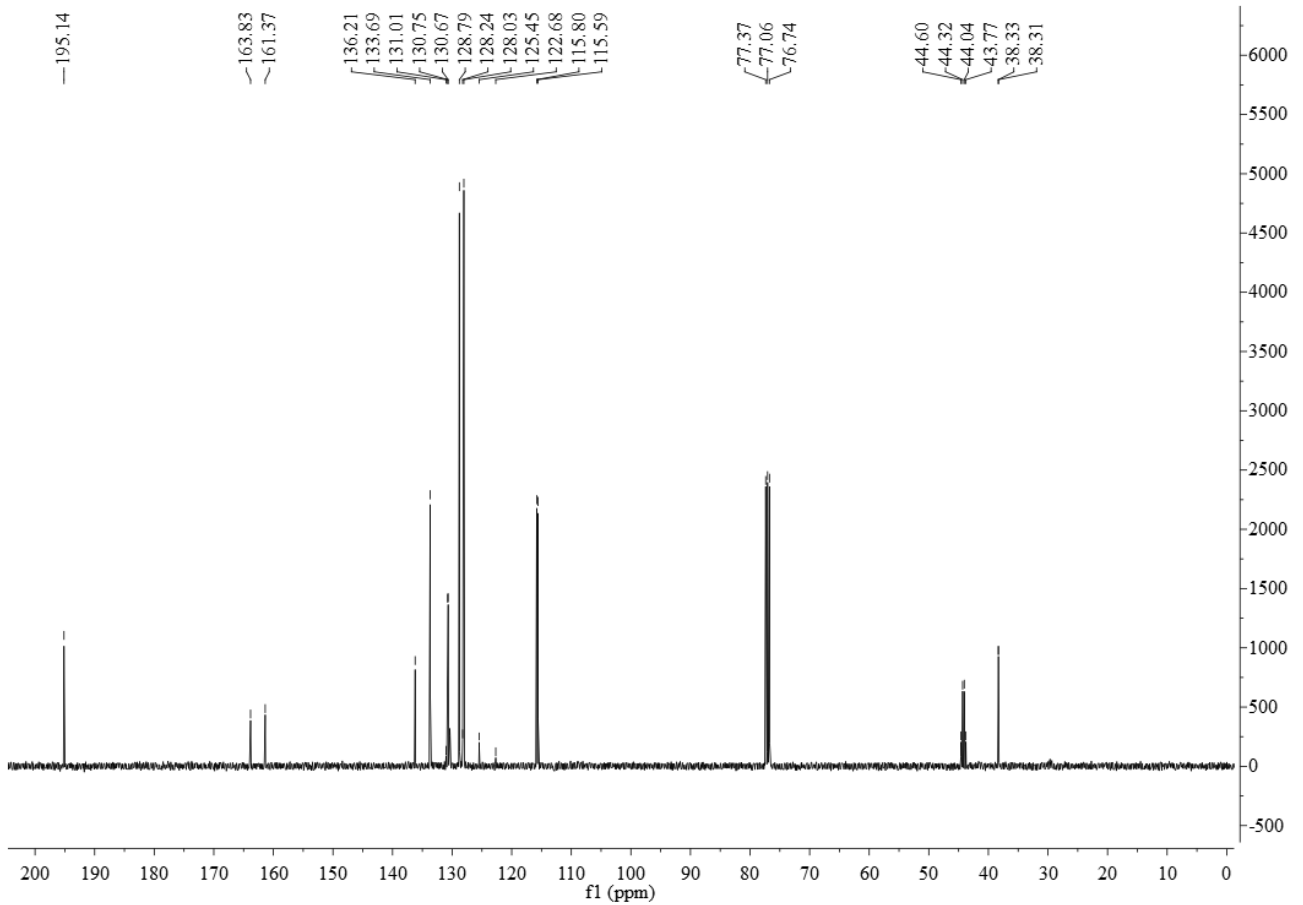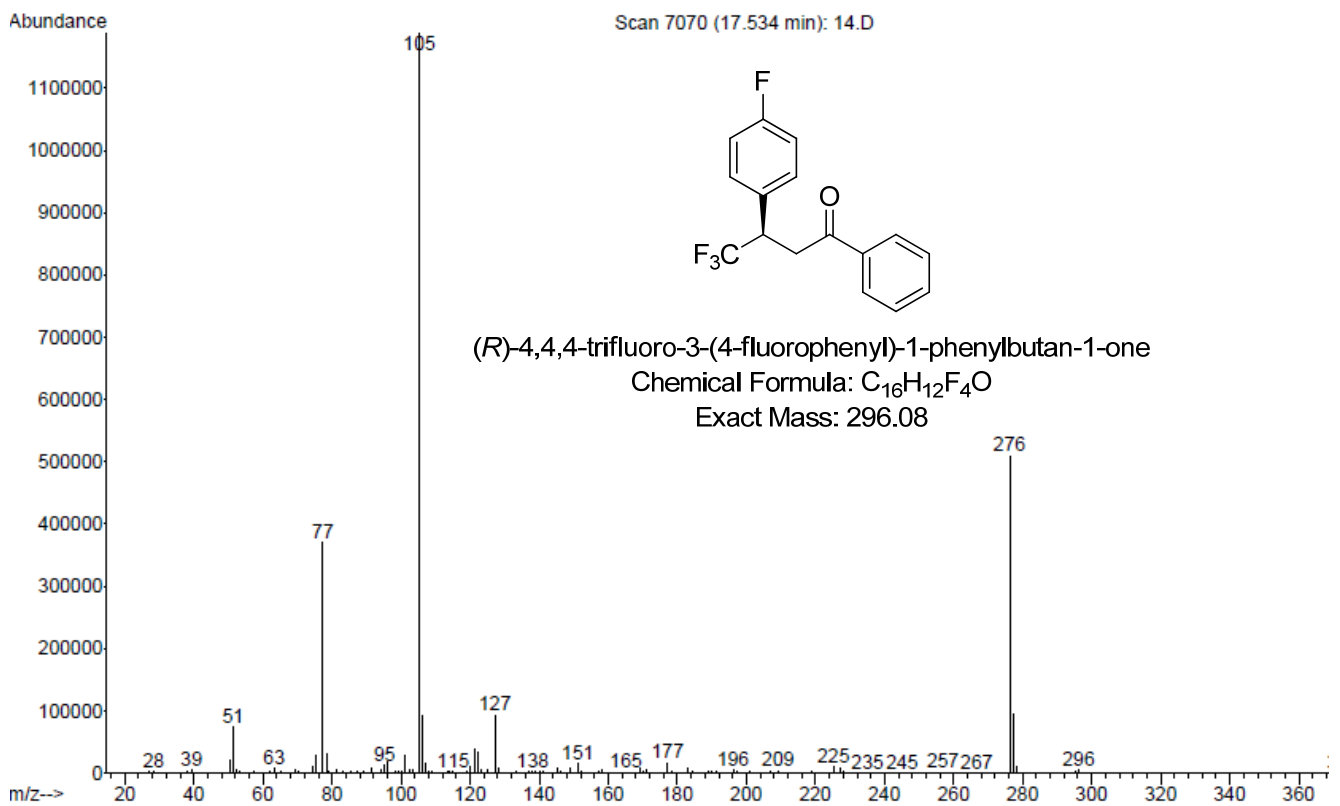

**6c: (R)-3-(4-Chlorophenyl)-4,4,4-trifluoro-1-phenylbutan-1-one**

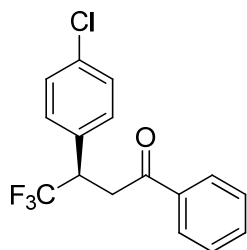

Yield: 97% (95% ee, 100% es);  $^1\text{H}$  NMR (400 MHz,  $\text{CDCl}_3$ ):  $\delta$ 3.60 (dd, 1H,  $J = 17.9$  Hz,  $J = 4.3$  Hz), 3.68 (dd, 1H,  $J = 17.8$  Hz,  $J = 9.1$  Hz), 4.21–4.33 (m, 1H), 7.30–7.36 (m, 4H), 7.46 (t, 2H,  $J = 7.8$  Hz), 7.61 (t, 1H,  $J = 7.4$  Hz), 7.92 (d, 2H,  $J = 7.3$  Hz);  $^{13}\text{C}$  NMR (100 MHz,  $\text{CDCl}_3$ ):  $\delta$ 38.2 (q,  $J = 2$  Hz), 44.6 (q,  $J = 27$  Hz), 126.9 (q,  $J = 277.7$  Hz), 128.3, 129.0, 129.2, 130.6, 133.3 (q,  $J = 1.5$  Hz), 133.9, 134.6, 136.4, 195.2; GC/MS (m/z): 312.05; HPLC (OD-H, elute: *n*-hexanes/*i*-PrOH = 95/5, detector: 254 nm, flow rate: 1.0 mL/min, 25 °C)  $t_1 = 5.8$  min,  $t_2 = 7.2$  min.

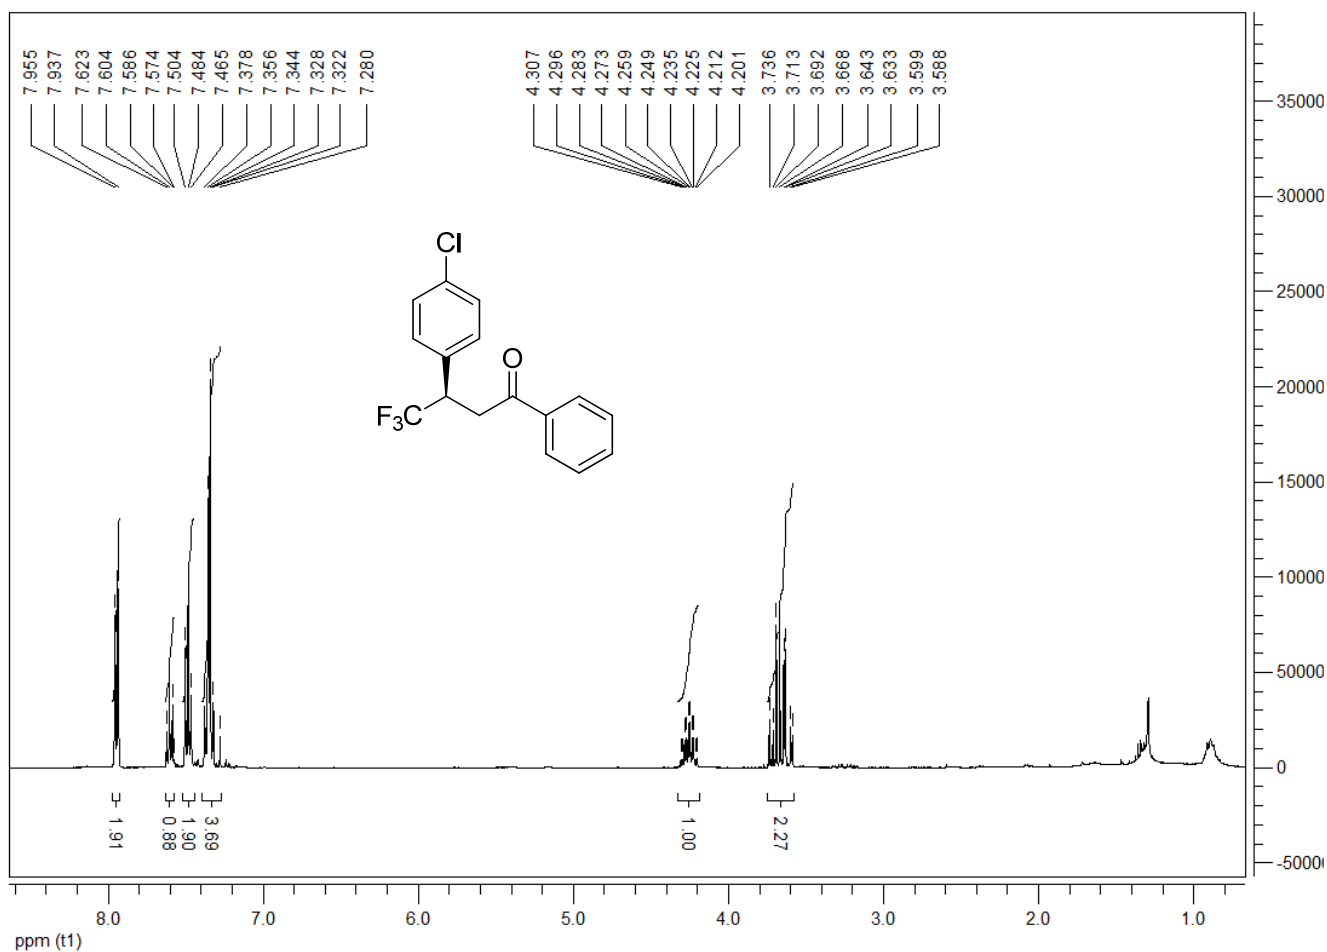

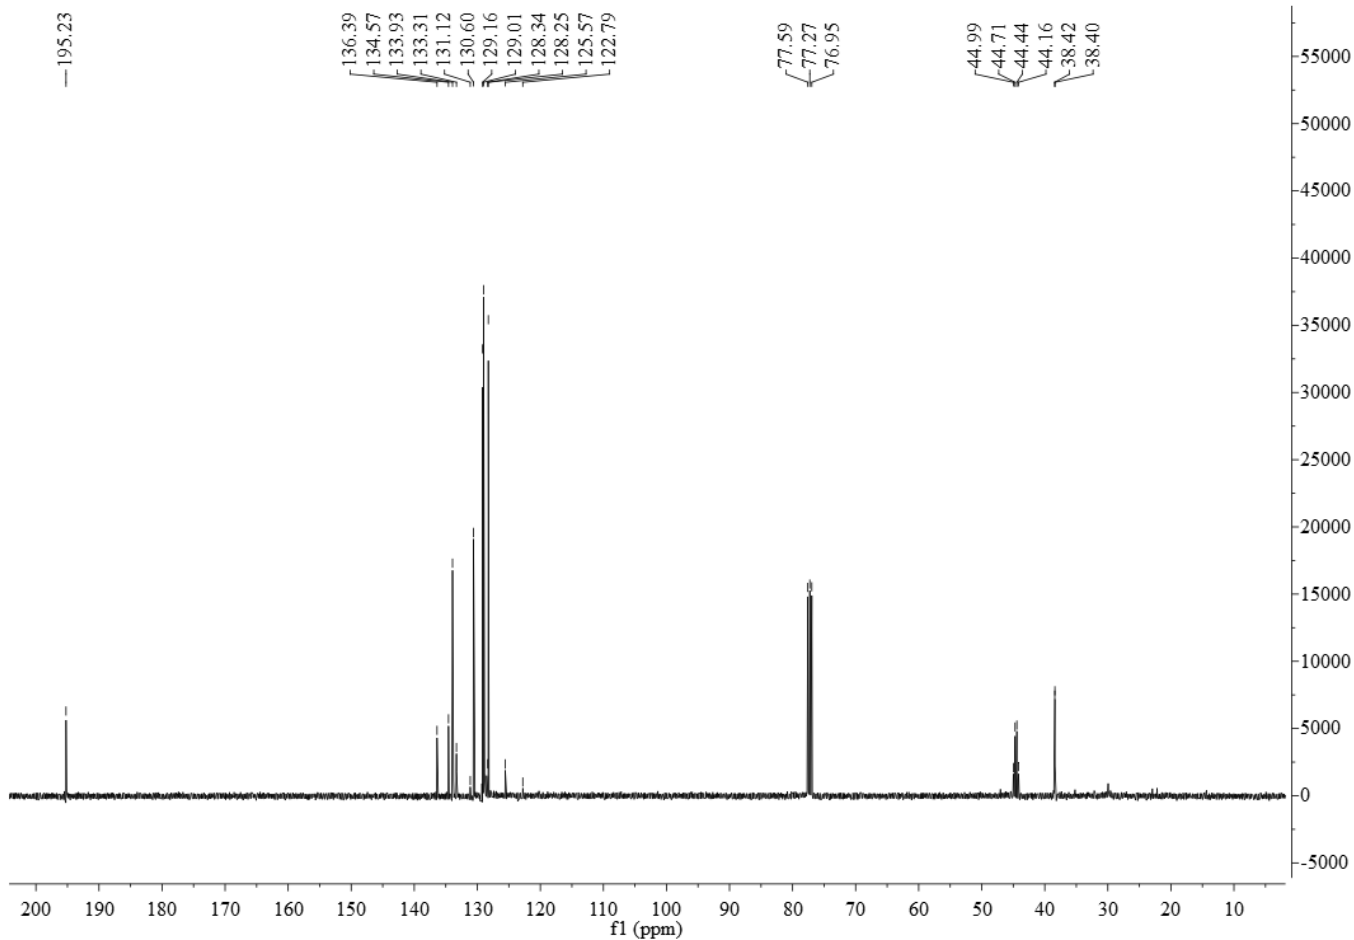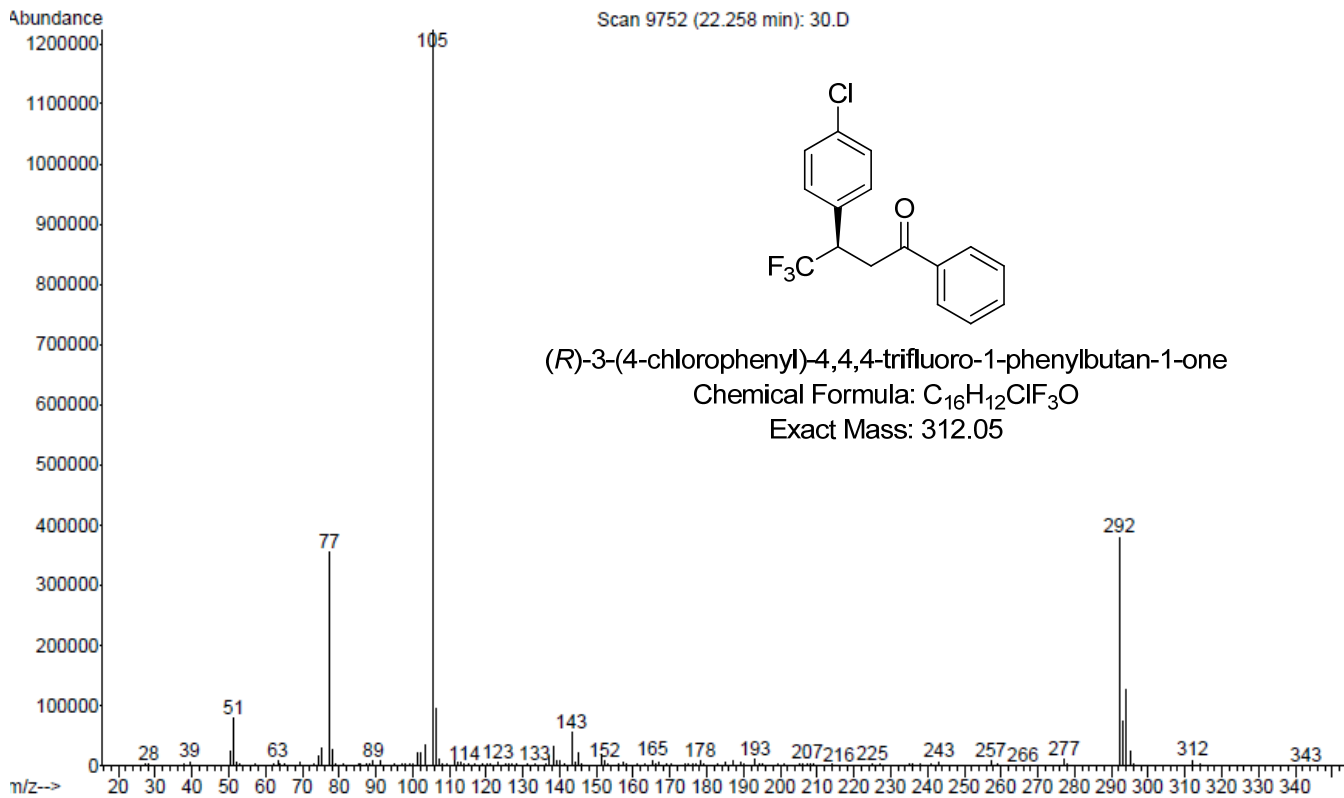



**6d: (R)-3-(4-Bromoophenyl)-4,4,4-trifluoro-1-phenylbutan-1-one**

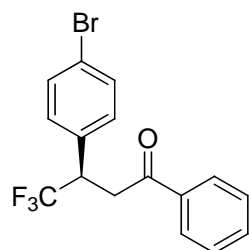

Yield: 95% (94% ee, 98% es);  $^1\text{H}$  NMR (400 MHz,  $\text{CDCl}_3$ ):  $\delta$  3.58 (dd, 1H,  $J = 3$  Hz,  $J = 18$  Hz), 3.67 (dd, 1H,  $J = 9$  Hz,  $J = 18$  Hz), 4.21 (m, 1H), 7.25-7.28 (m, 2H), 7.43-7.48 (m, 3H), 7.56-7.60 (m, 2H), 7.90-7.93 (m, 2H);  $^{13}\text{C}$  NMR (100 MHz,  $\text{CDCl}_3$ ):  $\delta$  38.2 (q,  $J = 2$  Hz), 44.6 (q,  $J = 27$  Hz), 122.7, 126.9 (q,  $J = 279$  Hz), 128.3, 129.0, 130.9, 132.1, 133.8, 133.9, 136.4, 195.2; GC/MS ( $m/z$ ): 356.00; HPLC (OD-H, elute:  $n$ -hexanes/ $i$ -PrOH = 95/5, detector: 254 nm, flow rate: 1.0 mL/min, 25 °C)  $t_1 = 5.2$  min,  $t_2 = 6.2$  min.

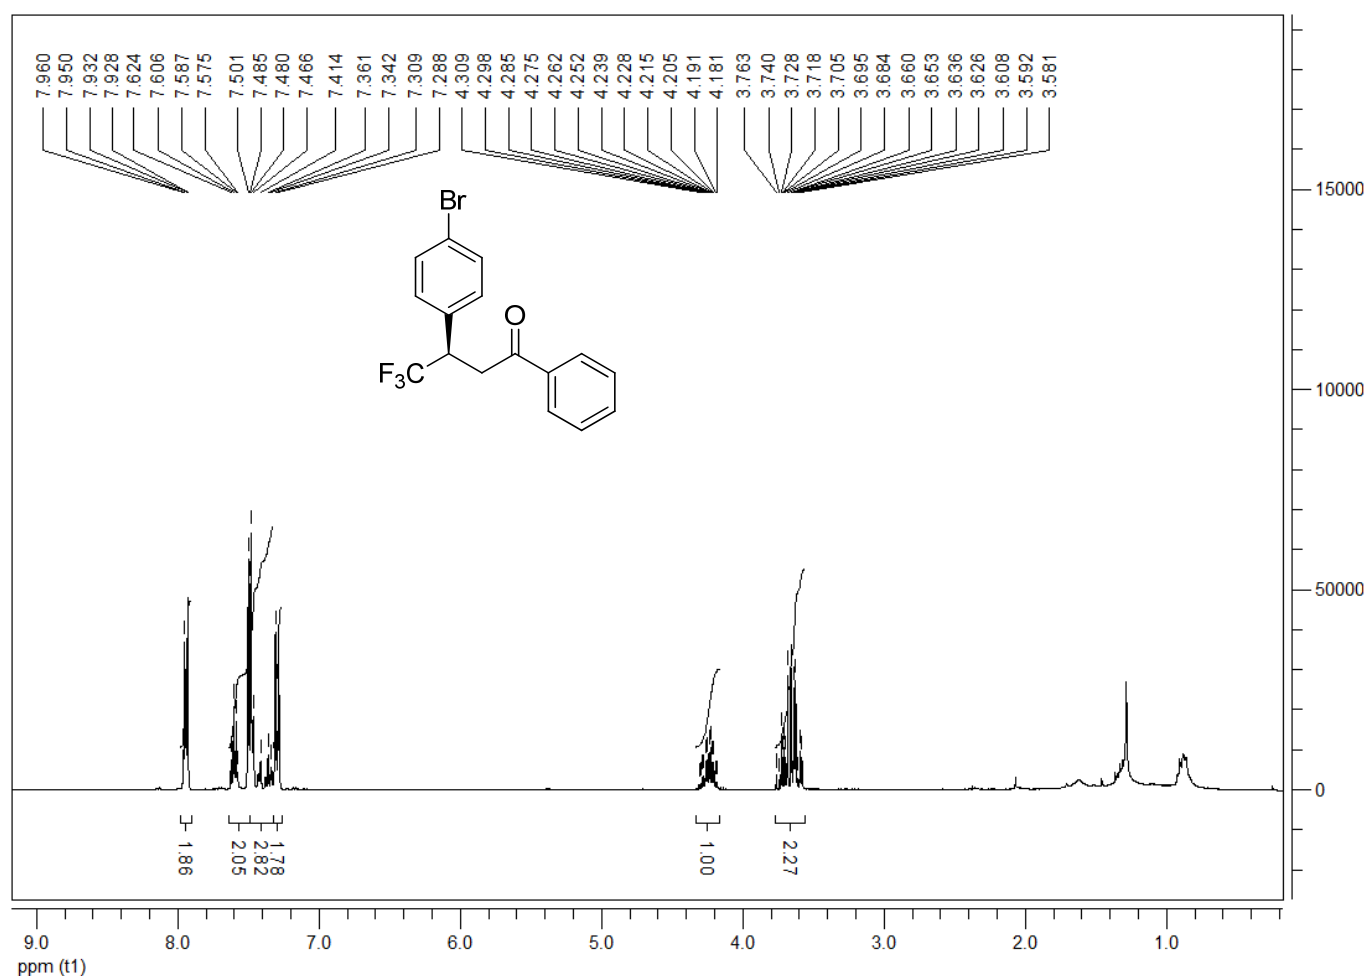

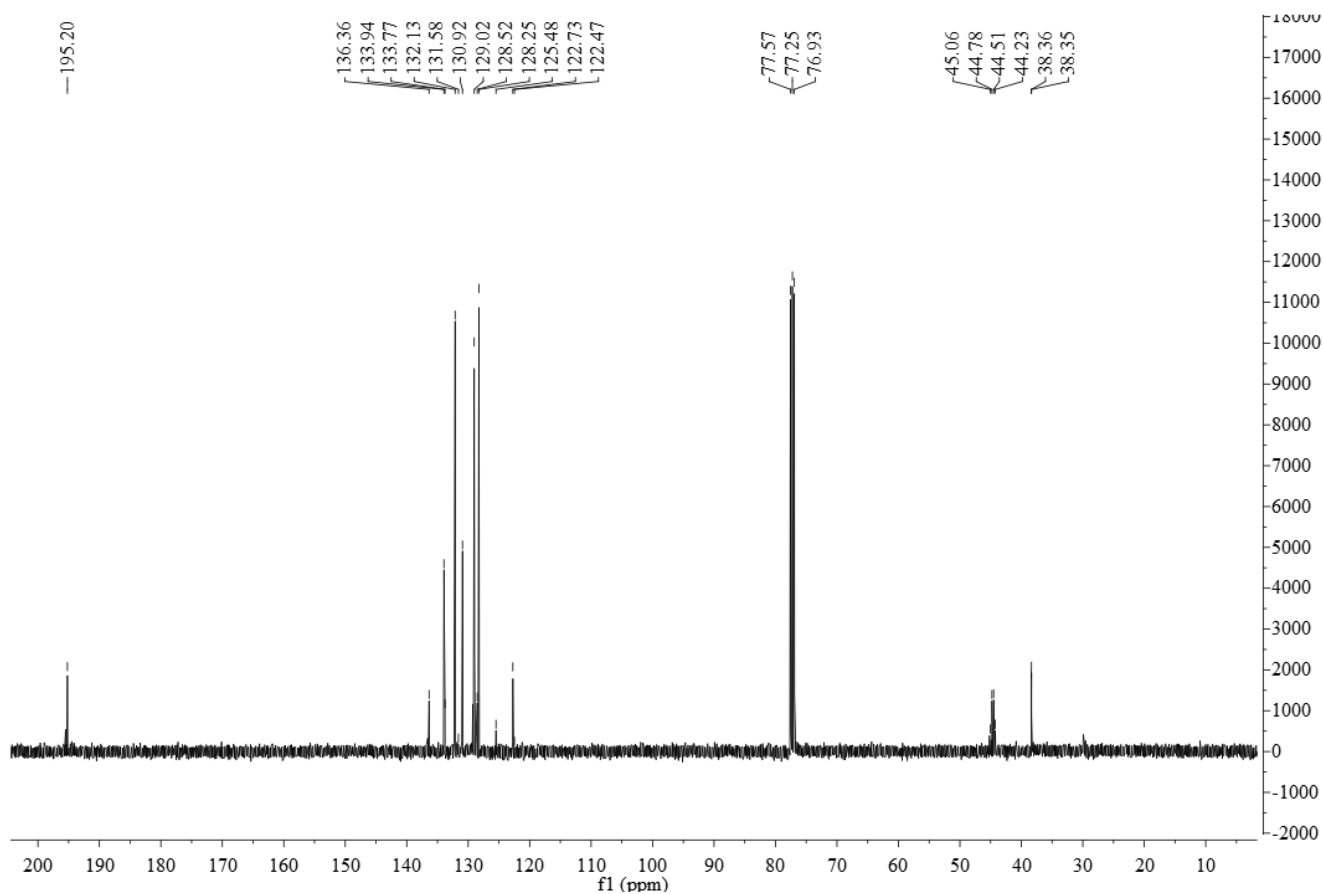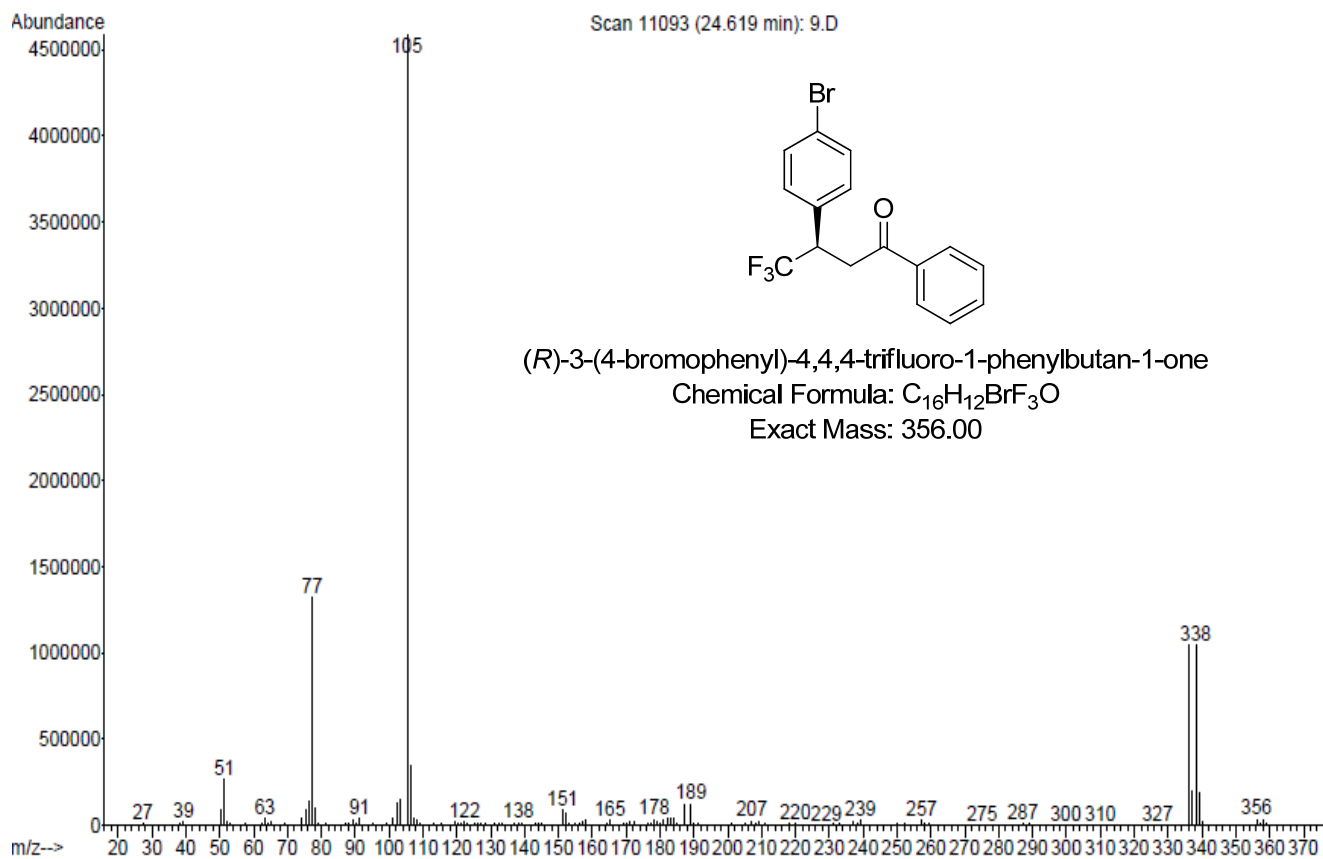

**6e: (R)-3-(3-Bromoephnyl)-4,4,4-trifluoro-1-phenylbutan-1-one.**

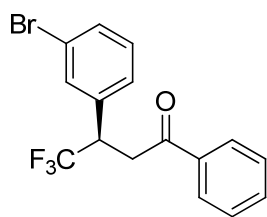

Yield: 94% (95% ee, 100% es);  $^1\text{H}$  NMR (400 MHz,  $\text{CDCl}_3$ ):  $\delta$  3.58 (dd, 1H,  $J = 3$  Hz,  $J = 18$  Hz), 3.67 (dd, 1H,  $J = 9$  Hz,  $J = 18$  Hz), 4.20 (m, 1H), 7.21-7.28 (m, 1H), 7.33-7.41 (m, 1H), 7.42-7.53 (m, 3H), 7.56-7.65 (m, 2H), 7.90-7.98 (m, 2H);  $^{13}\text{C}$  NMR (100 MHz,  $\text{CDCl}_3$ ):  $\delta$  38.4 (q,  $J = 2$  Hz), 44.7 (q,  $J = 27$  Hz), 122.9, 127.0 (q,  $J = 278$  Hz), 128.1, 128.3, 129.0, 130.4, 131.7, 132.2, 133.8, 133.9, 136.3,

195.1; GC/MS (m/z): 356.00; HPLC (OD-H, elute: *n*-hexanes/*i*-PrOH = 95/5, detector: 254 nm, flow rate: 1.0 mL/min, 25 °C)  $t_1 = 8.2$  min,  $t_2 = 10.5$  min.

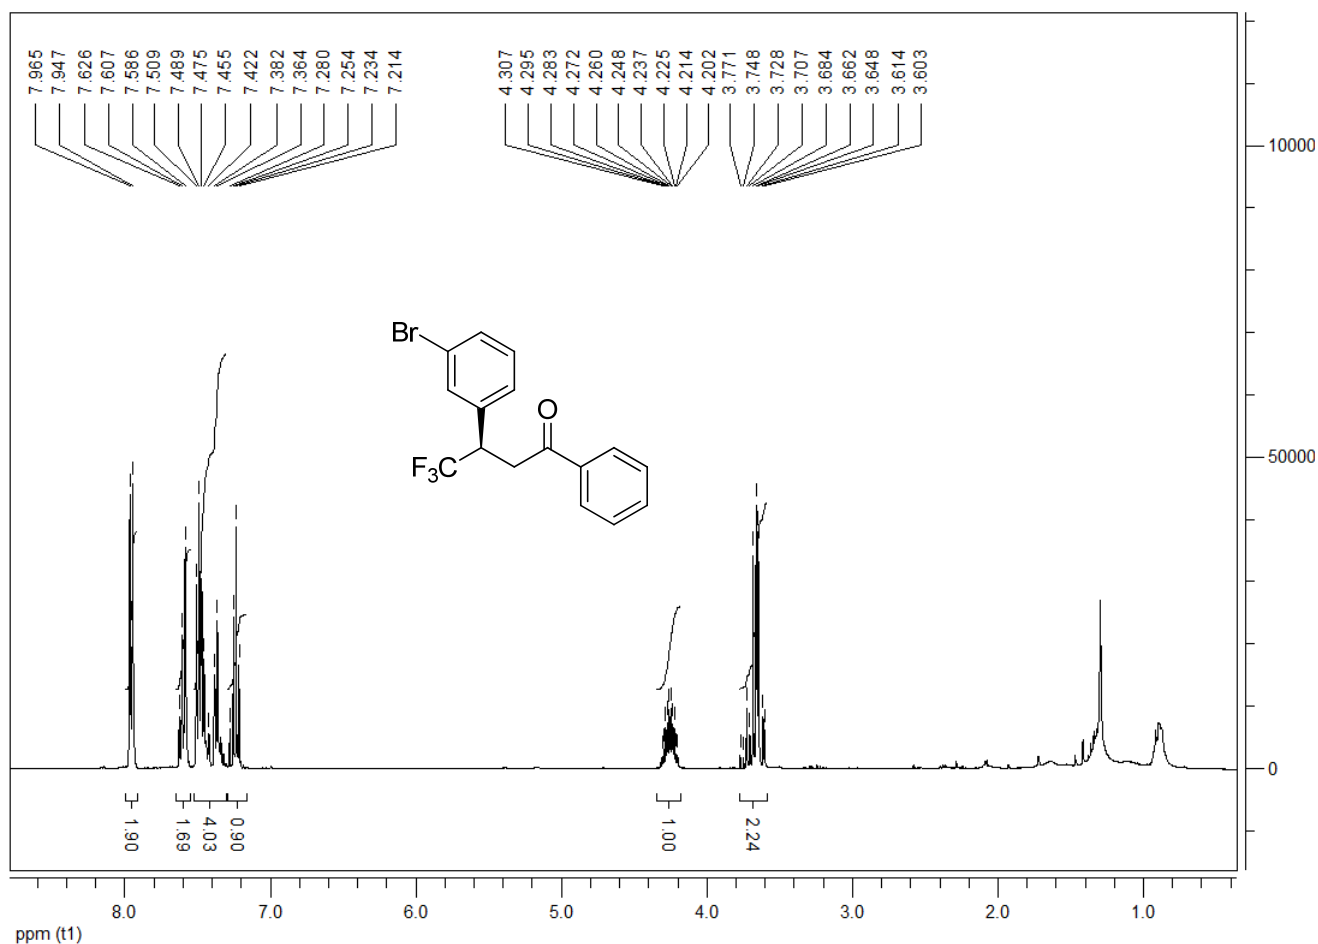

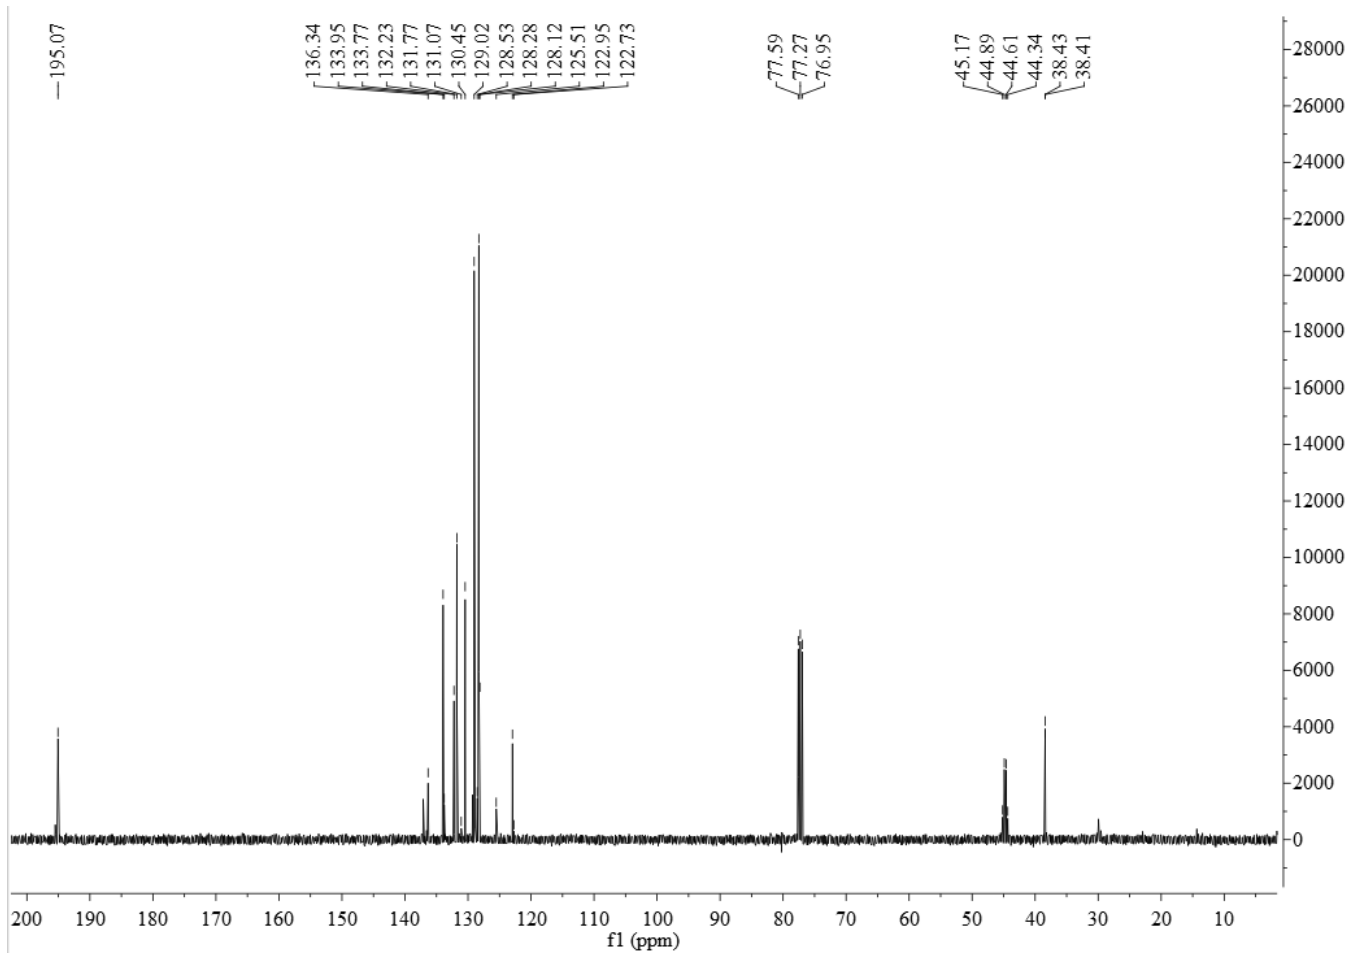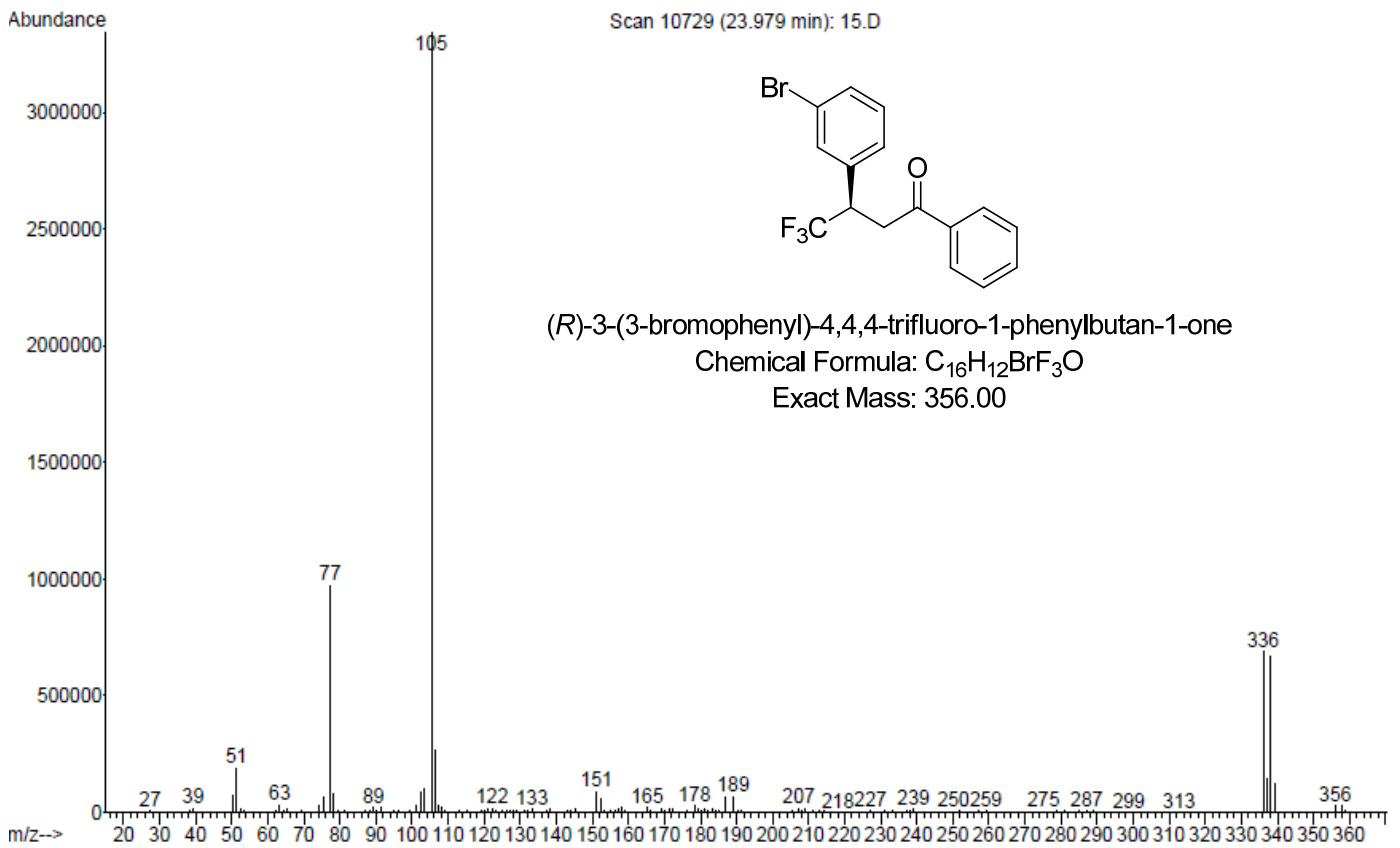

**6f: (R)-4,4,4-Trifluoro-1-phenyl-3-(4'-(trifluoromethyl)phenyl)butan-1-one**

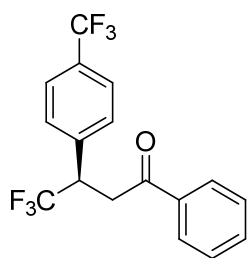

Yield: 97% (93% ee, 98% es);  $^1\text{H}$  NMR (400 MHz,  $\text{CDCl}_3$ ):  $\delta$  3.64 (dd, 1H,  $J = 3$  Hz,  $J = 18$  Hz), 3.74 (dd, 1H,  $J = 9$  Hz,  $J = 18$  Hz), 4.32 (m, 1H), 7.45-7.62 (m, 7H), 7.91-7.94 (m, 2H);  $^{13}\text{C}$  NMR (100 MHz,  $\text{CDCl}_3$ ):  $\delta$  38.1 (q,  $J = 1.5$  Hz), 44.7 (q,  $J = 28$  Hz), 123.9 (q,  $J = 271$  Hz), 125.7 (q,  $J = 4$  Hz), 126.6 (q,  $J = 278$  Hz), 128.0, 128.8, 129.5, 130.6 (q,  $J = 32$  Hz), 133.8, 136.0, 138.6, 194.8; GC/MS ( $m/z$ ): 346.08; HPLC (OD-H, elute: *n*-hexanes/*i*-PrOH = 95/5, detector: 254 nm, flow rate: 1.0 mL/min, 25  $^\circ\text{C}$ )  $t_1 = 6.5$  min,  $t_2 = 8.3$  min

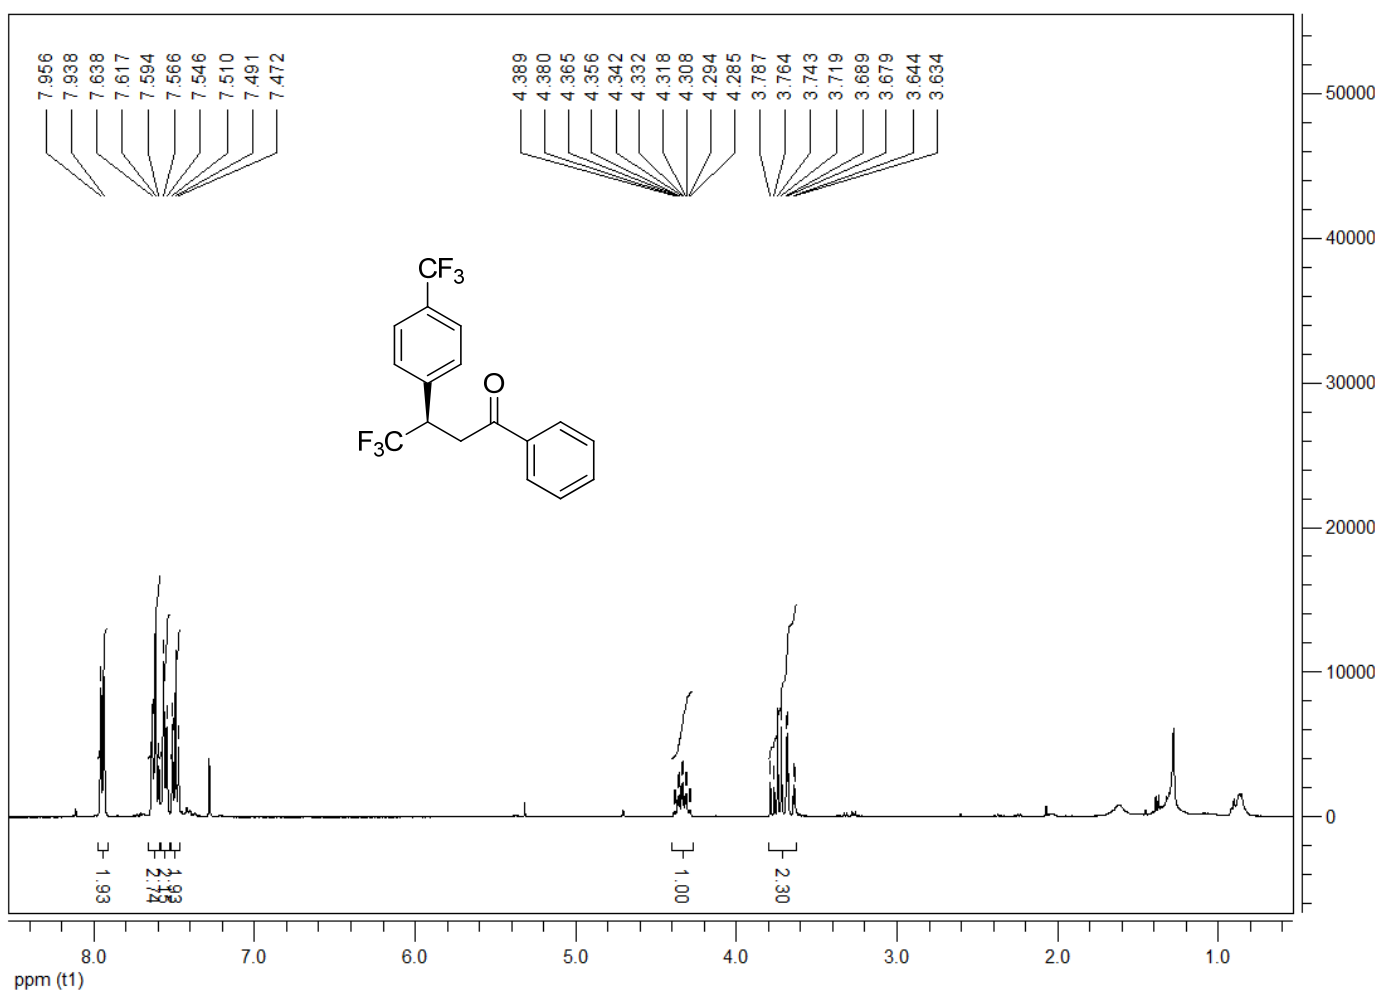

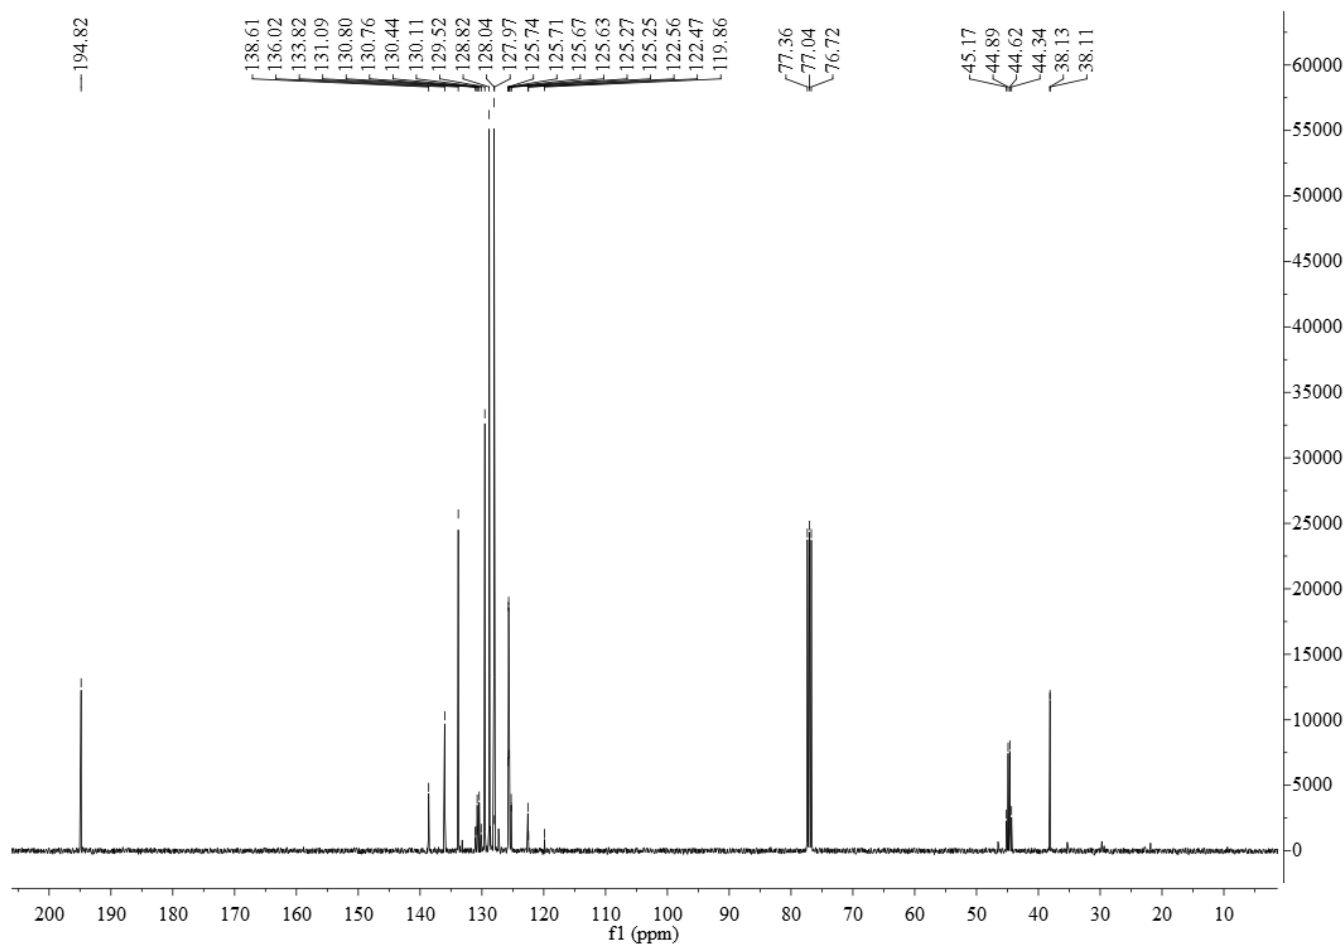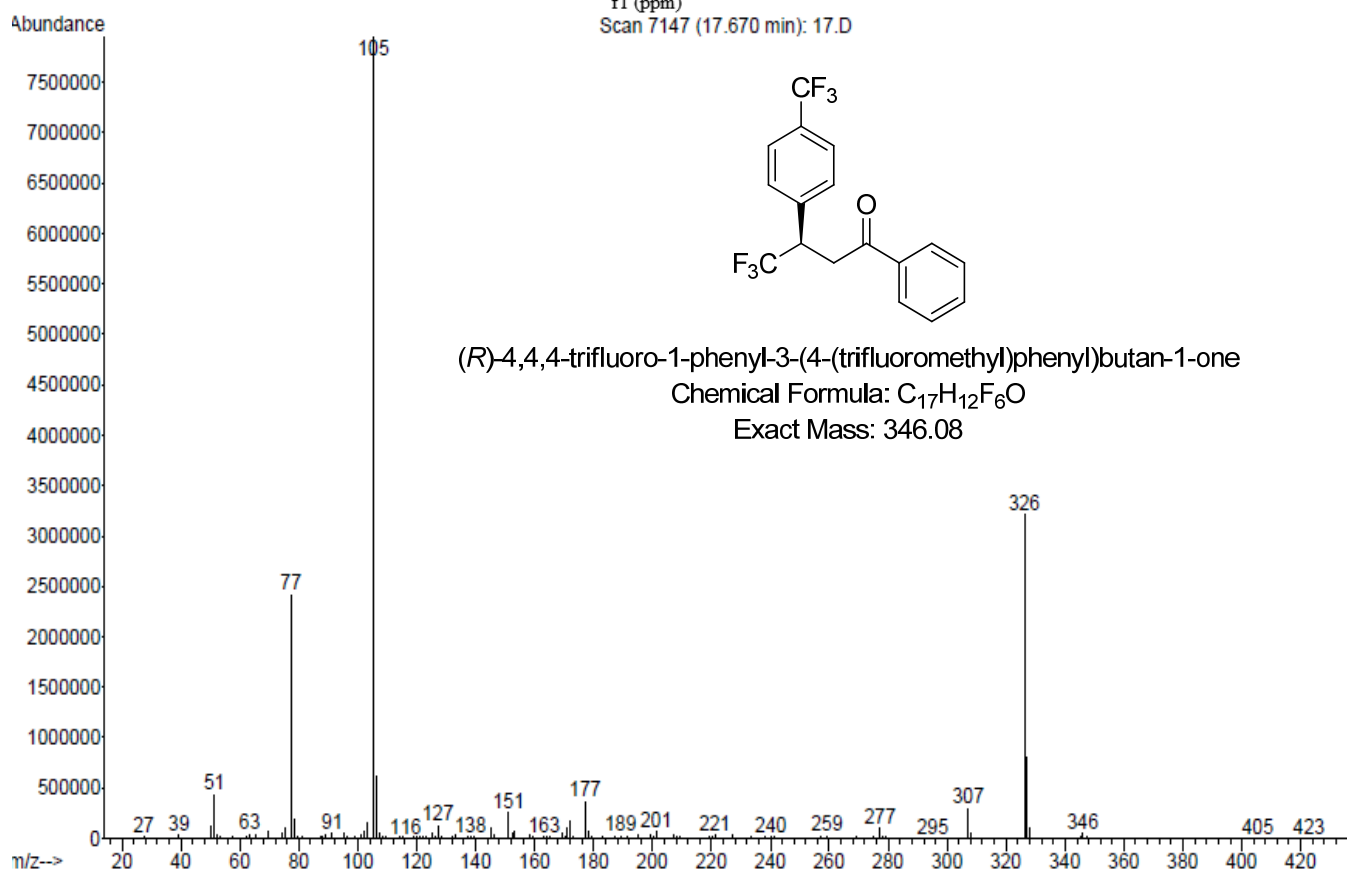

**6g: (R)-4,4,4-trifluoro-1-phenyl-3-*p*-tolylbutan-1-one**

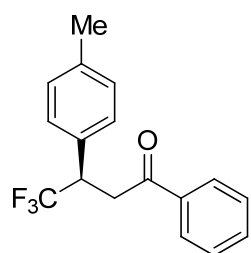

Yield: 96% (93% ee, 99% es);  $^1\text{H}$  NMR (400 MHz,  $\text{CDCl}_3$ ):  $\delta$ 2.32 (s, 3H), 3.59 (dd, 1H,  $J = 17.7$  Hz,  $J = 3.9$  Hz), 3.73 (dd, 1H,  $J = 17.8$  Hz,  $J = 9.2$  Hz), 4.19–4.25 (m, 1H), 7.16 (d, 2H,  $J = 7.7$  Hz), 7.30 (d, 2H,  $J = 7.7$  Hz), 7.46 (t, 2H,  $J = 7.6$  Hz), 7.58 (t, 1H,  $J = 7.2$  Hz), 7.94 (d, 2H,  $J = 7.6$  Hz);  $^{13}\text{C}$  NMR (100 MHz,  $\text{CDCl}_3$ ):  $\delta$ 20.0, 37.2 (q,  $J = 1.5$  Hz), 43.3 (q,  $J = 27$  Hz), 125.9 (q,  $J = 277$  Hz), 127.0, 127.6, 127.8, 128.3, 130.4 (q,  $J = 2$  Hz), 131.5, 132.5, 135.2, 137.0, 194.3; GC/MS (m/z): 292.11; HPLC (OD-H, elute: *n*-hexanes/*i*-PrOH = 95/5, detector: 254 nm, flow rate: 1.0 mL/min, 25 °C)  $t_1 = 5.4$  min,  $t_2 = 6.1$  min.

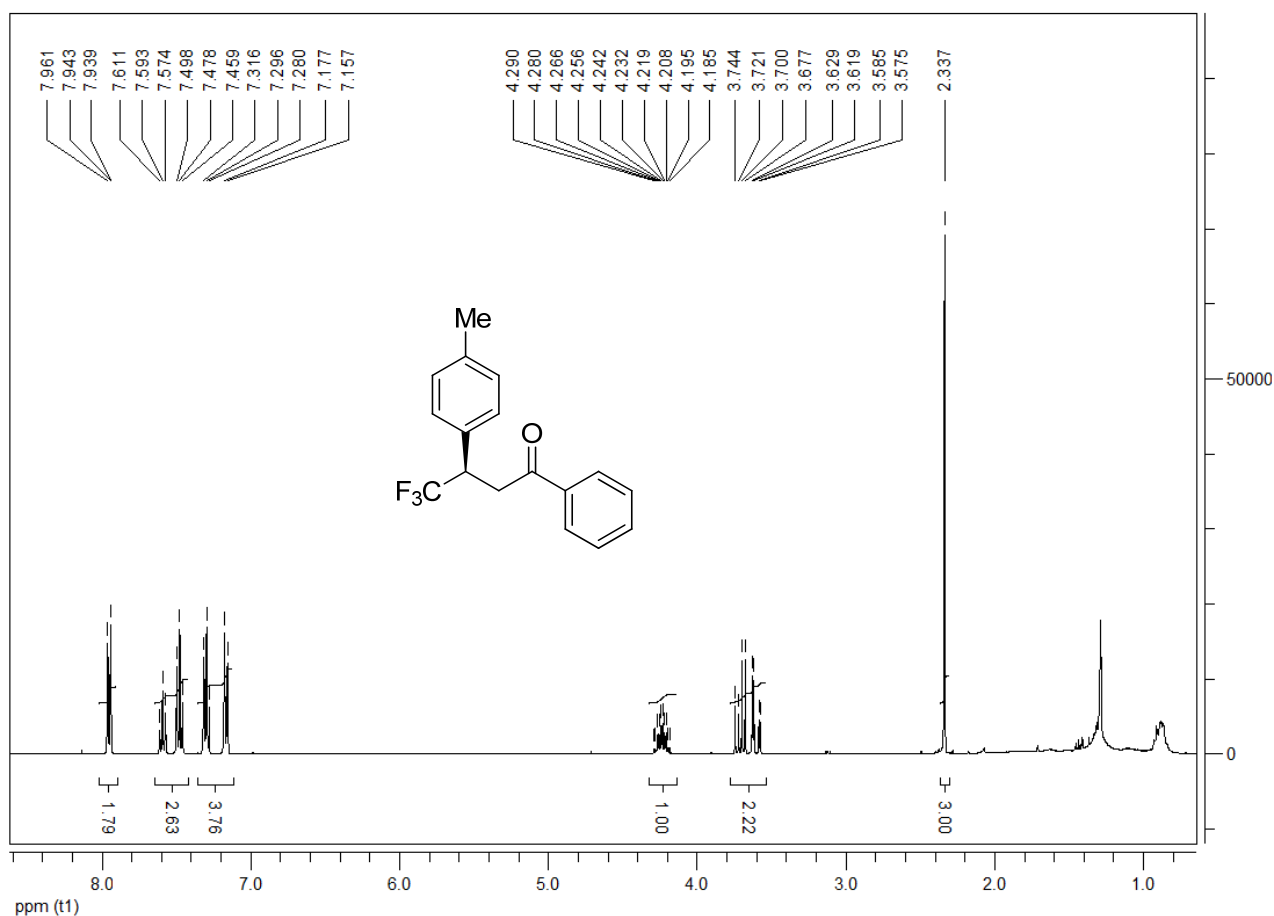

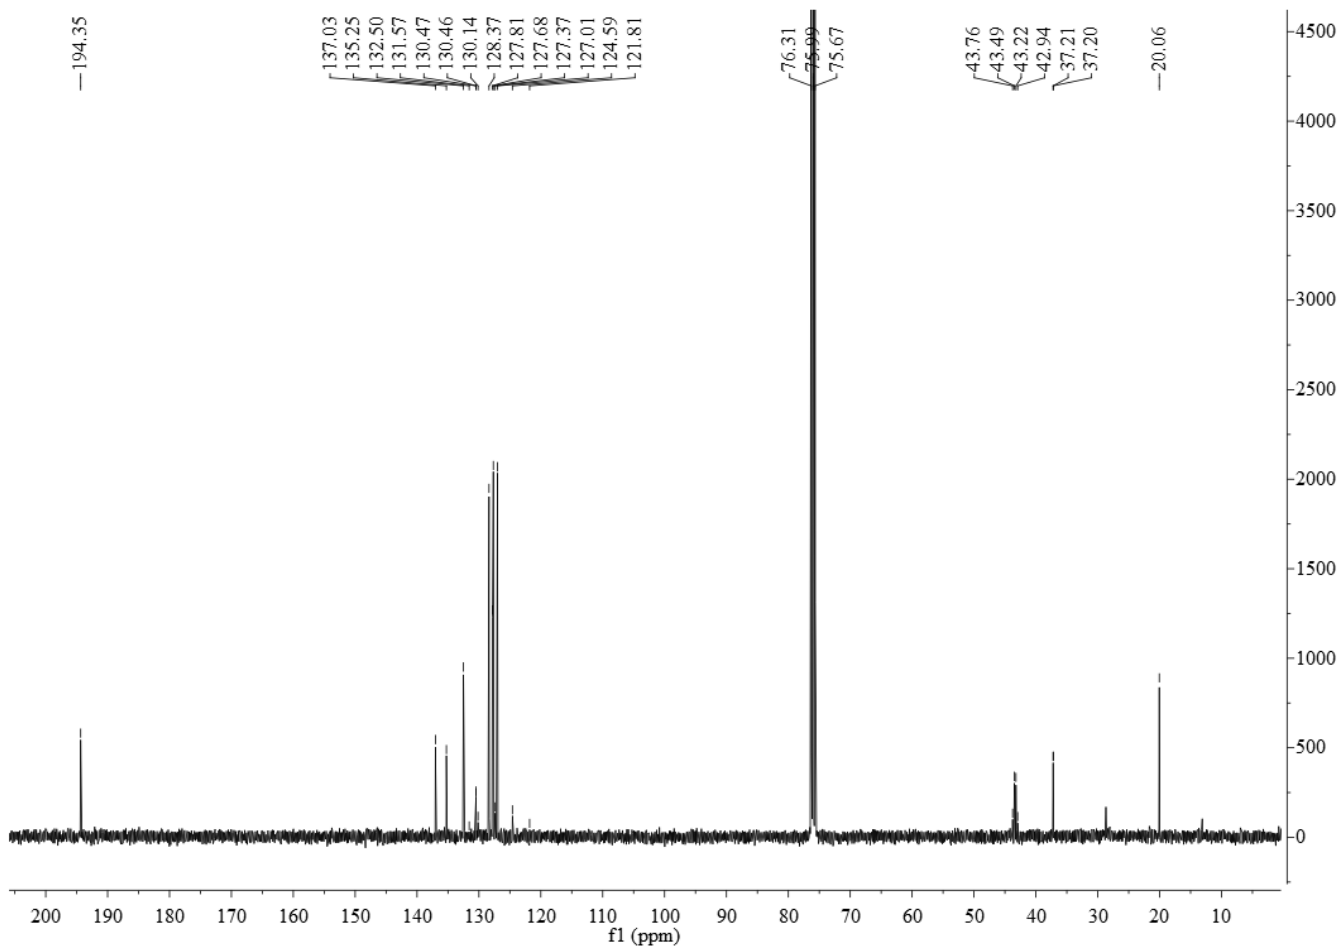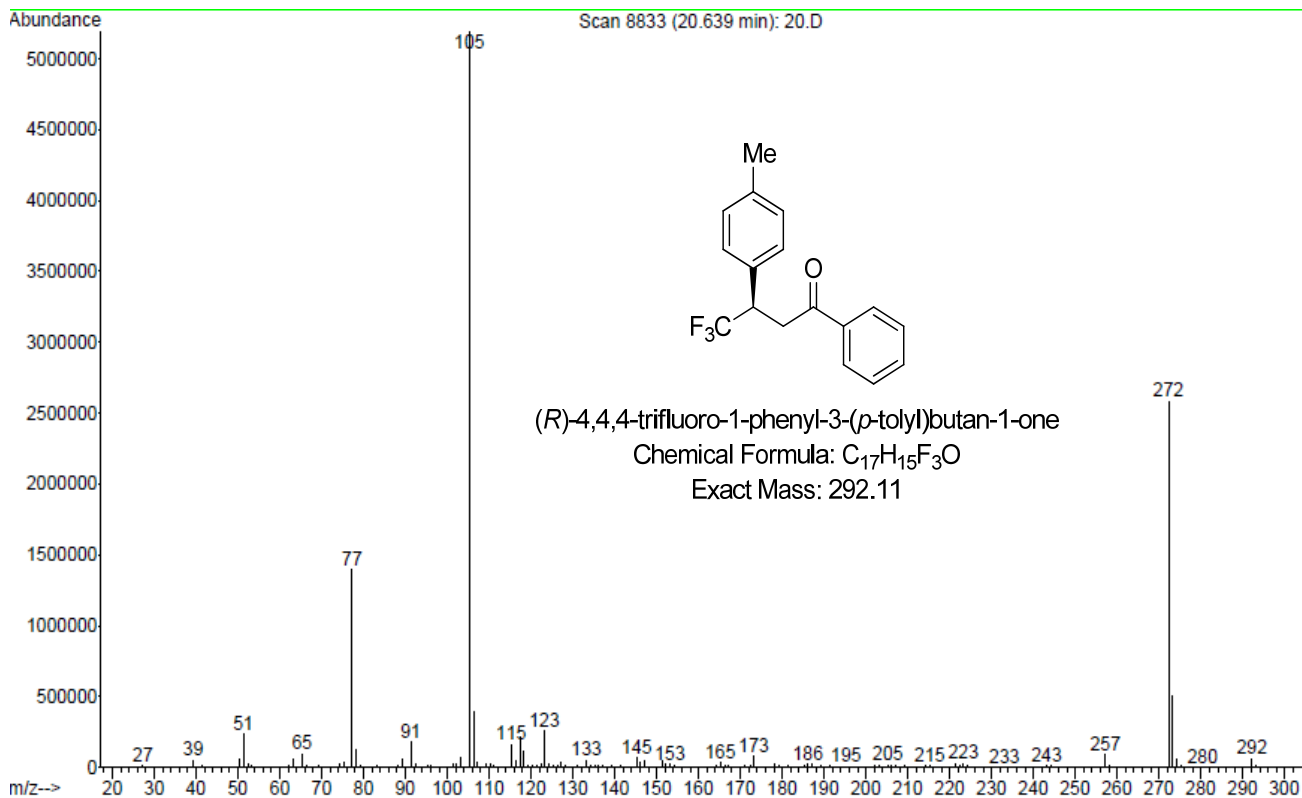



**6h: (R)-4,4,4-Trifluoro-3-(4-methoxyphenyl)-1-phenylbutan-1-one**

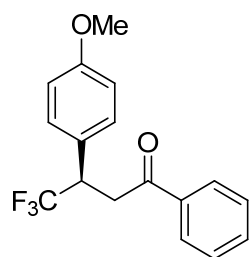

Yield: 92% (93% ee, 95% es);  $^1\text{H}$  NMR (400 MHz,  $\text{CDCl}_3$ ):  $\delta$  3.56 (dd, 1H,  $J = 4$  Hz,  $J = 18$  Hz), 3.68 (dd, 1H,  $J = 9$  Hz,  $J = 18$  Hz), 3.77 (s, 3H), 4.12-4.27 (m, 1H), 6.85-6.89 (m, 2H), 7.30-7.33 (m, 2H), 7.43-7.48 (m, 2H), 7.54-7.60 (m, 1H), 7.91-7.95 (m, 2H);  $^{13}\text{C}$  NMR (100 MHz,  $\text{CDCl}_3$ ):  $\delta$  38.6 (q,  $J = 2$  Hz), 44.3 (q,  $J = 27$  Hz), 55.4, 114.3, 126.7 (q,  $J = 2$  Hz), 127.3 (q,  $J = 277$  Hz), 128.3, 128.9, 130.3, 133.7, 136.6, 159.7, 195.7; GC/MS (m/z): 308.10; HPLC (OD-H, elute: *n*-hexanes/*i*-PrOH = 95/5, detector: 254 nm, flow rate: 1.0 mL/min, 25 °C)  $t_1 = 14.4$  min,  $t_2 = 15.0$  min.

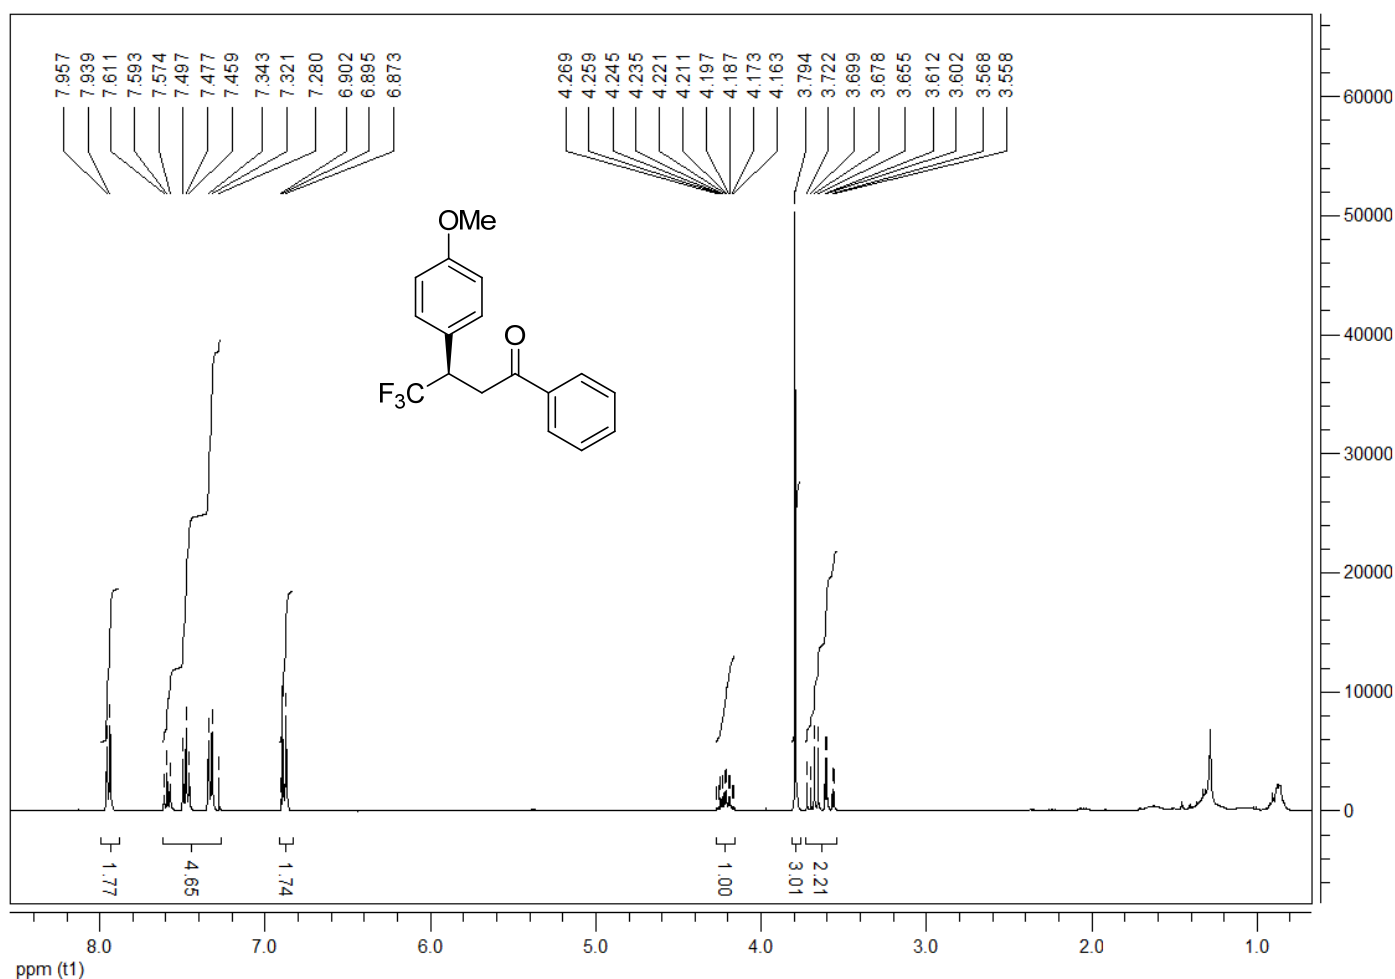

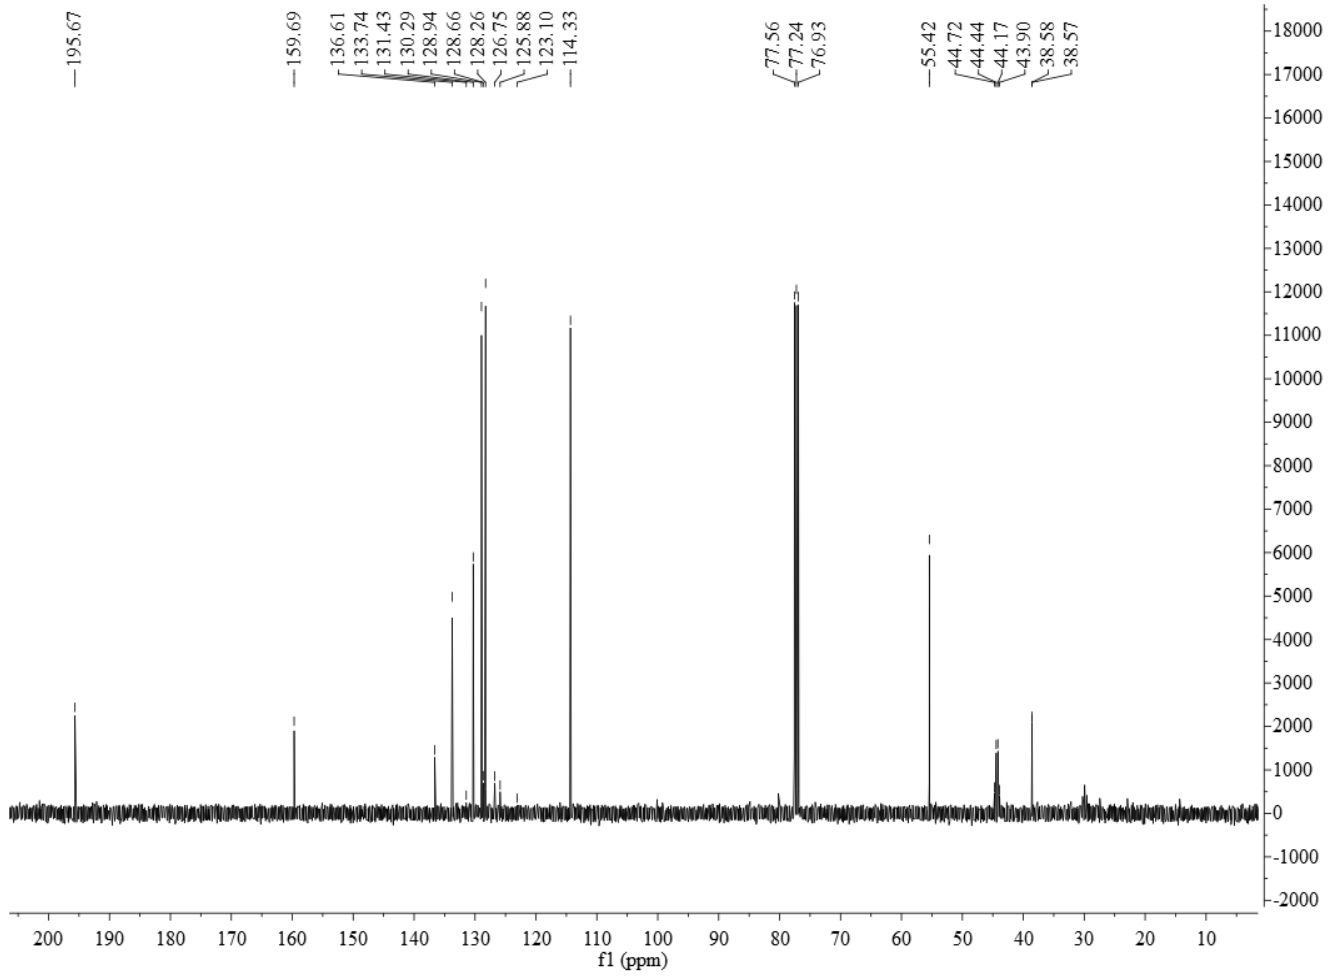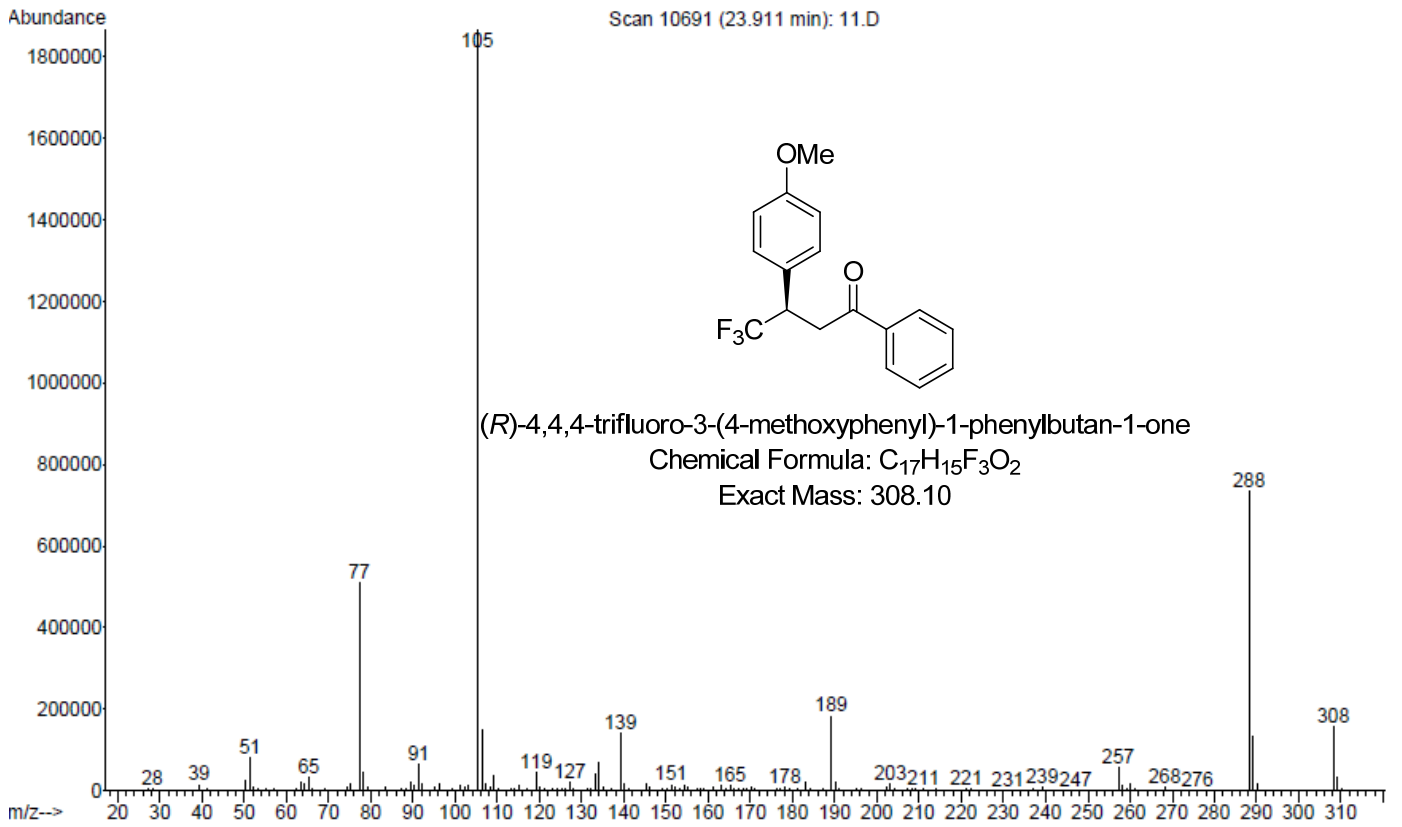

**6i: (R)-4,4,4-Trifluoro-3-methyl-1-phenylbutan-1-one**

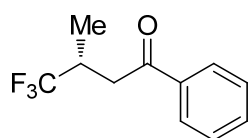

Yield: 97% (88% ee, 98% es);  $^1\text{H}$  NMR (400 MHz,  $\text{CDCl}_3$ ):  $\delta$  1.19 (d,  $J = 6\text{ Hz}$ , 3H),

2.98-3.06 (m, 2H), 3.26-3.35 (m, 1H), 7.49 (t,  $J = 7\text{ Hz}$ , 2H), 7.60 (t,  $J = 7\text{ Hz}$ , 1H),

7.97 (d,  $J = 7\text{ Hz}$ , 2H);  $^{13}\text{C}$  NMR (100 MHz,  $\text{CDCl}_3$ ):  $\delta$  13.3 (q,  $J = 2\text{ Hz}$ ), 33.9 (q,  $J$

$= 27\text{ Hz}$ ), 38.5 (q,  $J = 2\text{ Hz}$ ), 128.0, 128.3 (q,  $J = 276\text{ Hz}$ ), 128.8, 133.6, 136.5, 196.4; GC/MS (m/z):

216.08; HPLC (OJ-H, elute: *n*-hexanes/*i*-PrOH = 99/1, detector: 254 nm, flow rate: 0.5 mL/min, 25 °C)

$t_1 = 12.8\text{ min}$ ,  $t_2 = 13.4\text{ min}$ .

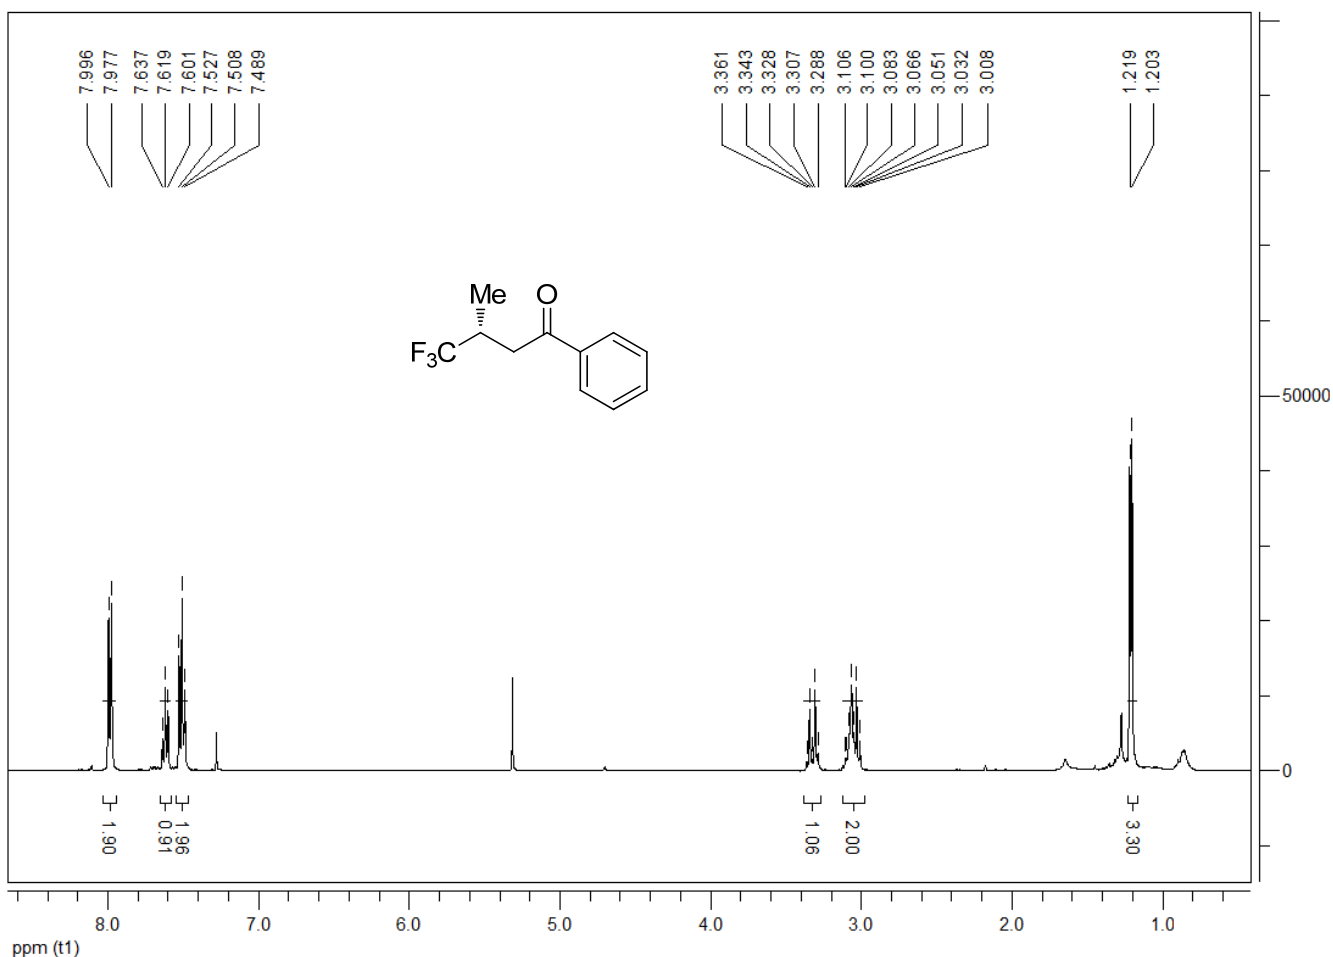

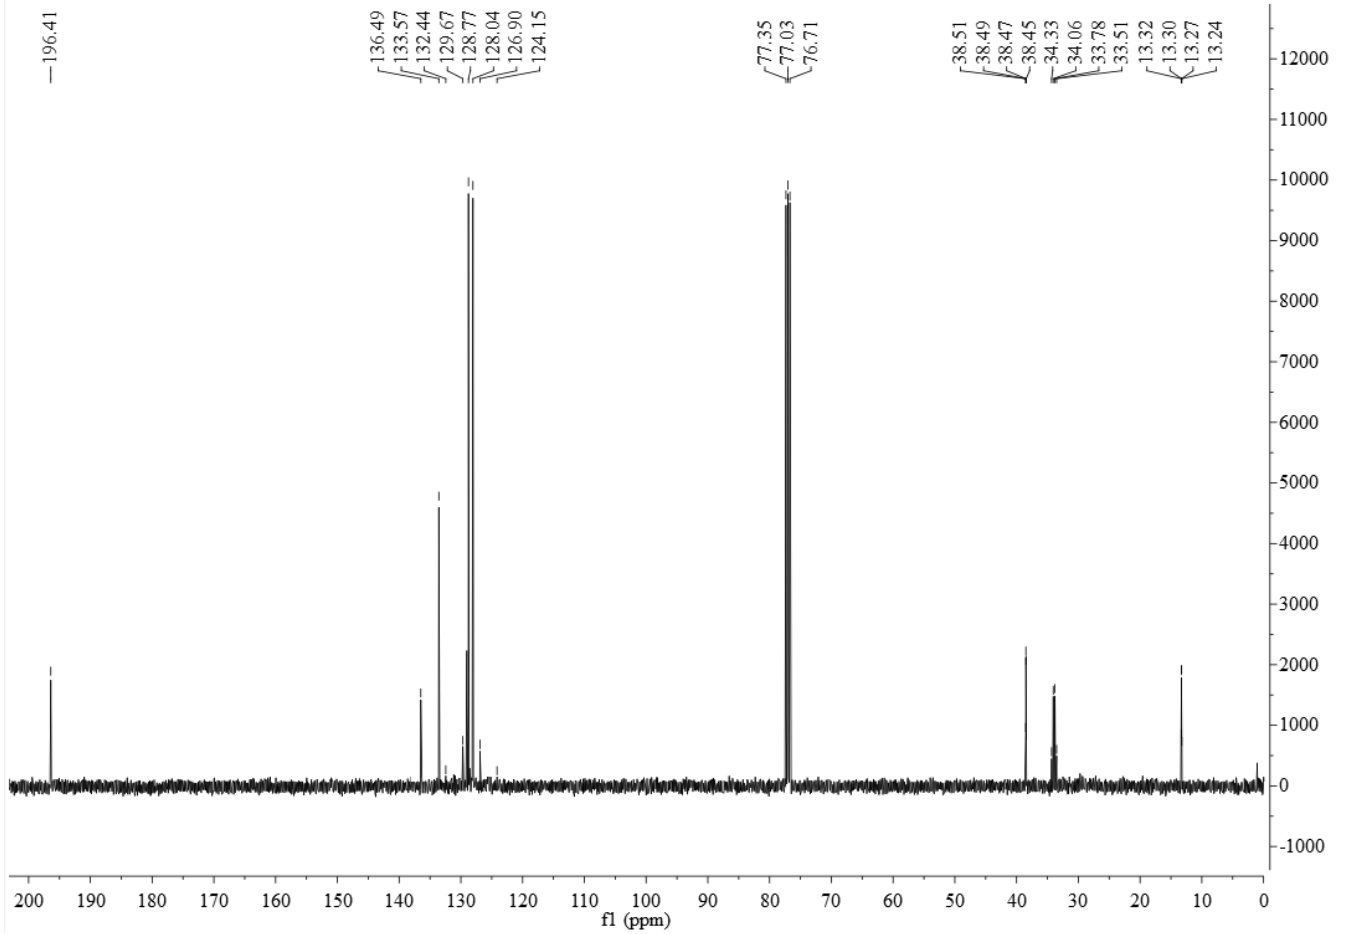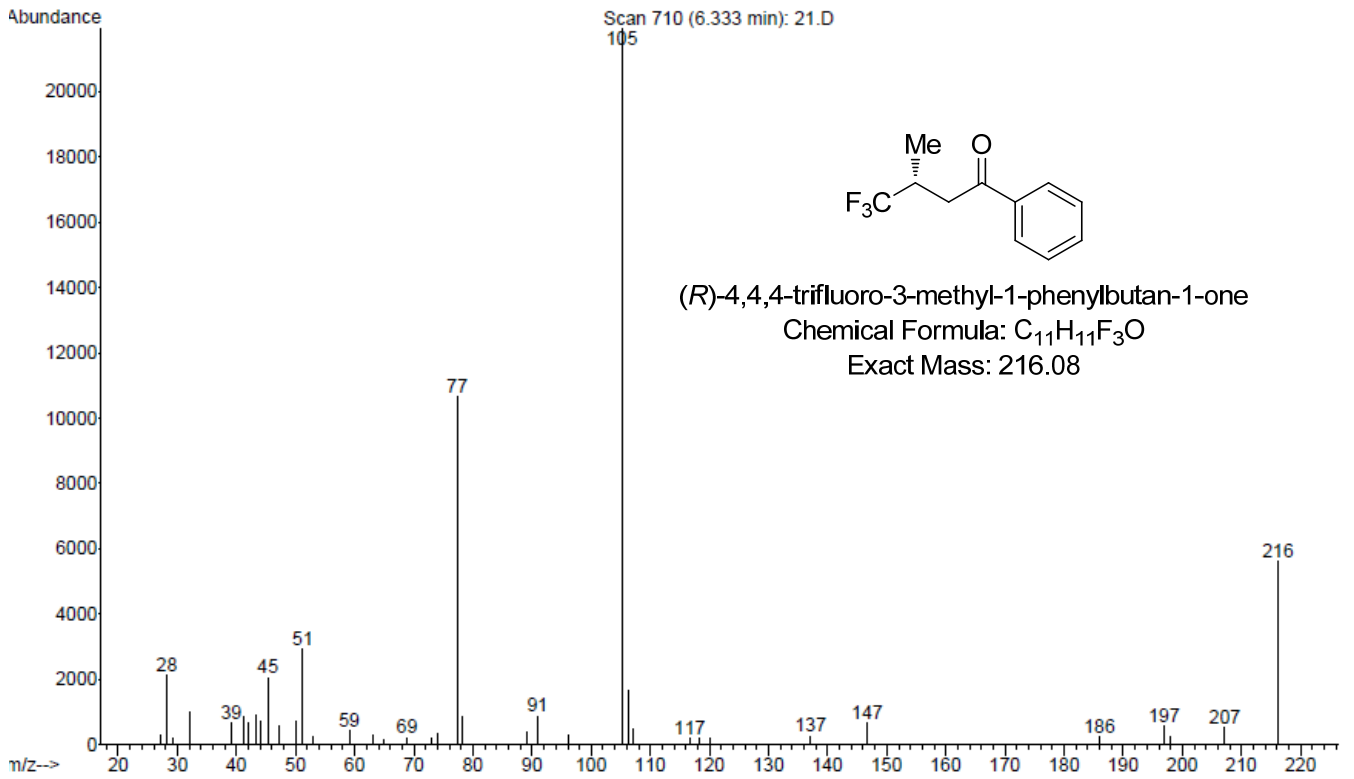

**6j: (R)-1-(4-Chlorophenyl)-4,4,4-trifluoro-3-phenyl-1-butanone**

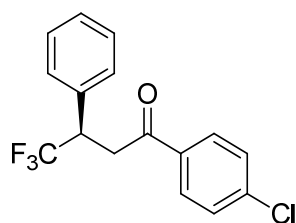

Yield: 96% (88% ee, 97% es); <sup>1</sup>H NMR (400 MHz, CDCl<sub>3</sub>): δ3.53 (dd, 1H, *J* = 17.8 Hz, *J* = 4.4 Hz), 3.64 (dd, 1H, *J* = 17.8 Hz, *J* = 8.8 Hz), 4.12–4.26 (m, 1H), 7.28–7.40 (m, 7H), 7.82 (d, 2H, *J* = 8.6 Hz); <sup>13</sup>C NMR (100 MHz, CDCl<sub>3</sub>): δ38.5 (q, *J* = 2 Hz) 45.0 (q, *J* = 27 Hz), 127.0 (q, *J* = 277.8 Hz), 128.6, 129.0, 129.2, 129.3, 129.7, 134.6 (q, *J* = 2 Hz), 134.8, 140.3, 194.3; GC/MS (*m/z*): 312.05; HPLC (OD-H, elute: *n*-hexanes/*i*-PrOH = 95/5, detector: 254 nm, flow rate: 1.0 mL/min, 25 °C) *t*<sub>1</sub> = 6.3 min, *t*<sub>2</sub> = 7.2 min.

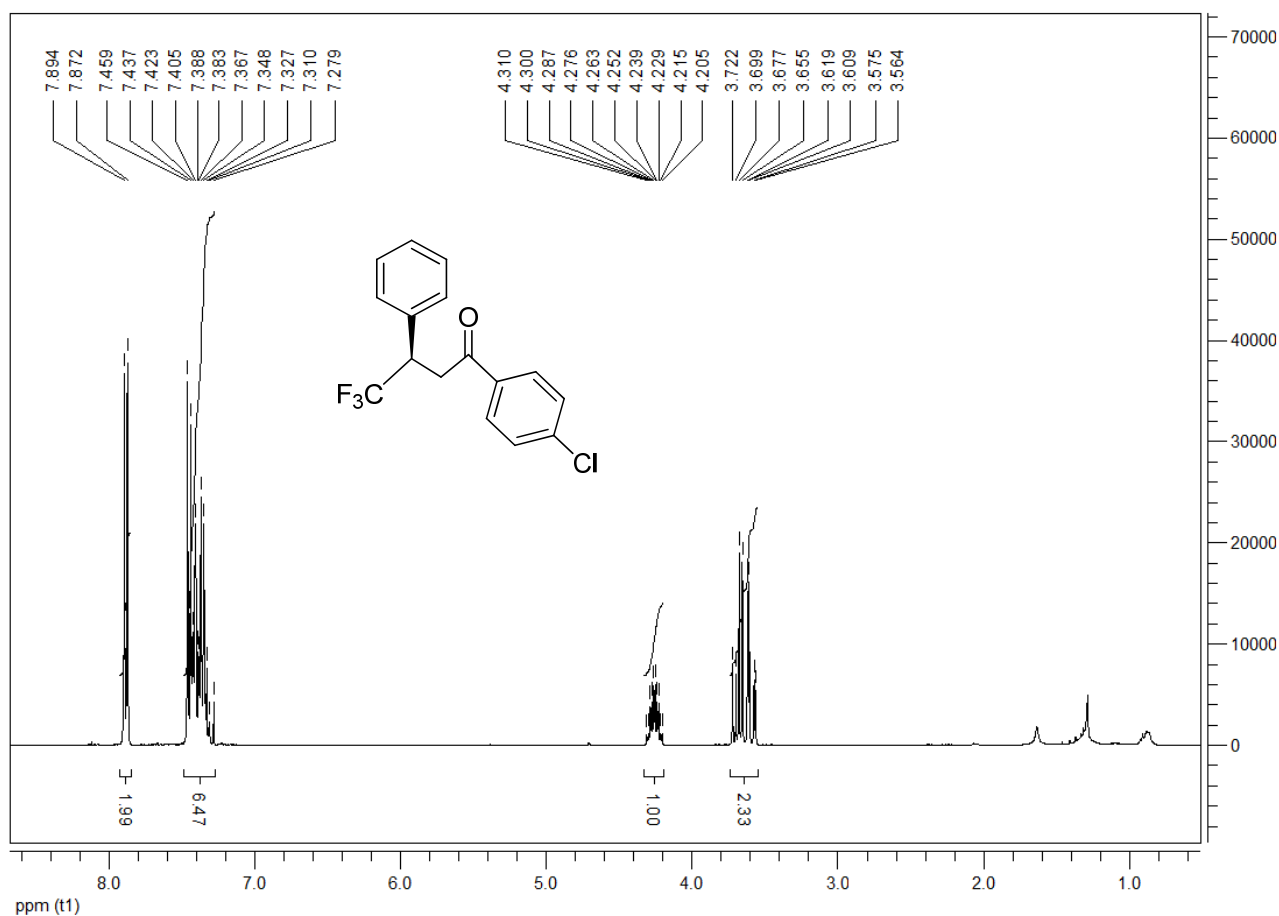

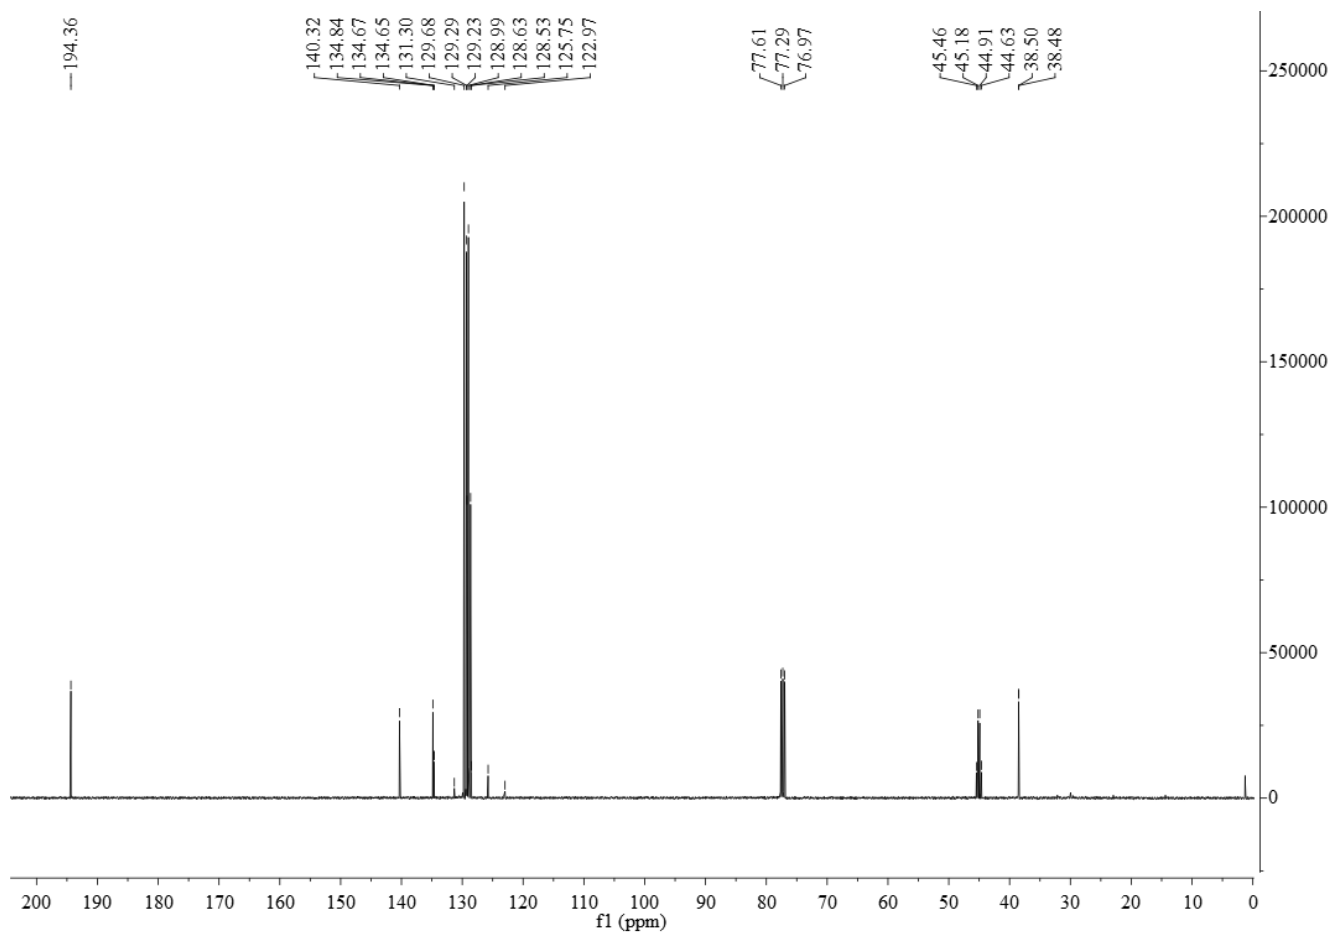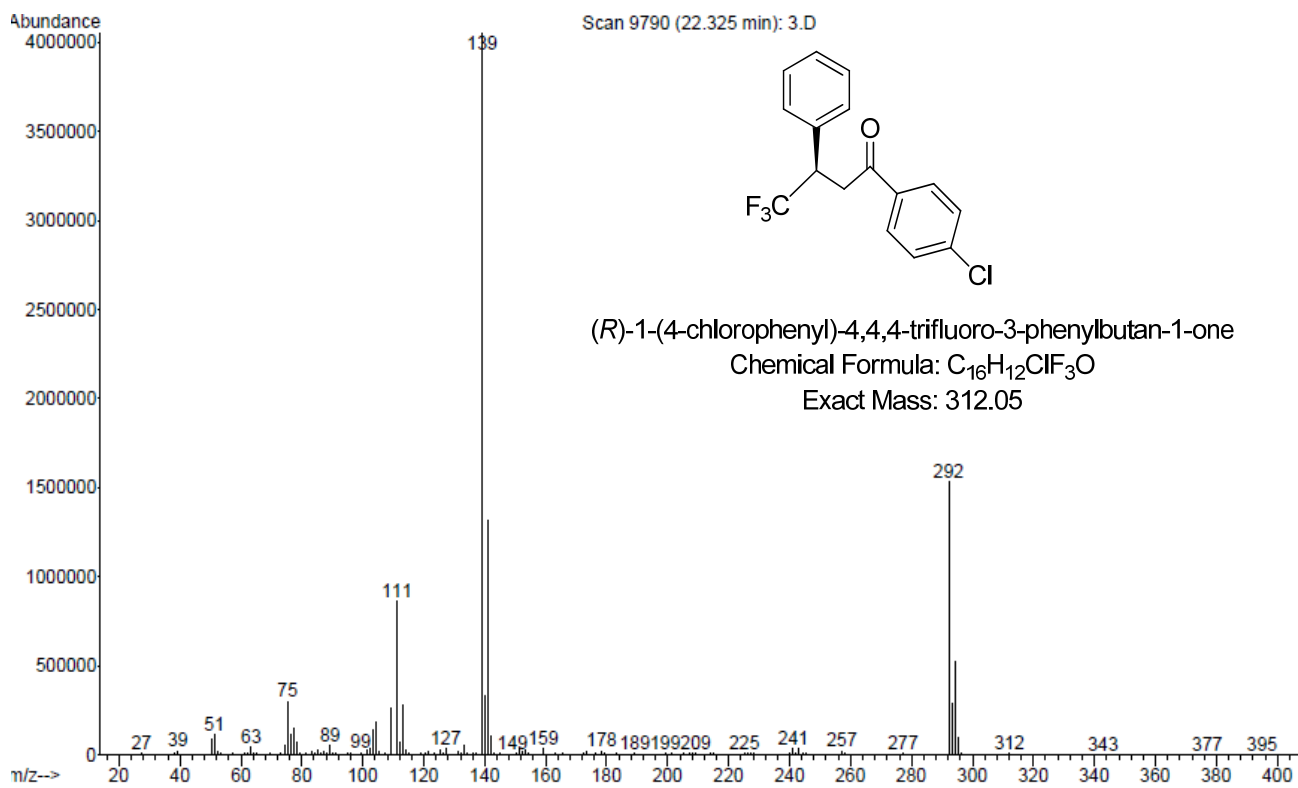

**6k: (R)-1-(4-Bromophenyl)-4,4,4-trifluoro-3-phenylbutan-1-one**

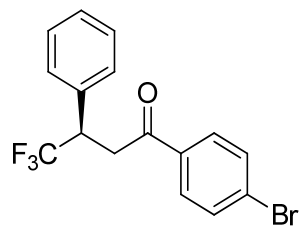

Yield: 95% (94% ee, 100% es);  $^1\text{H}$  NMR (400 MHz,  $\text{CDCl}_3$ ):  $\delta$ 3.57 (dd, 1H,  $J = 17.7$  Hz,  $J = 4.4$  Hz), 3.66 (dd, 1H,  $J = 17.7$  Hz,  $J = 8.8$  Hz), 4.16–4.30 (m, 1H), 7.30–7.40 (m, 5H), 7.60 (d, 2H,  $J = 8.5$  Hz), 7.78 (d, 2H,  $J = 8.5$  Hz);  $^{13}\text{C}$  NMR (100 MHz,  $\text{CDCl}_3$ ):  $\delta$ 38.3 (q,  $J = 2$  Hz), 44.8 (q,  $J = 27$  Hz), 126.9 (q,  $J = 277.7$  Hz), 128.4, 128.8, 129.0, 129.1, 129.6, 132.1, 134.4 (q,  $J = 2$  Hz), 135.0, 194.4; GC/MS (m/z): 356.00; HPLC (OD-H, elute: *n*-hexanes/*i*-PrOH = 95/5, detector: 254 nm, flow rate: 1.0 mL/min, 25 °C)  $t_1 = 6.2$  min,  $t_2 = 7.1$  min.

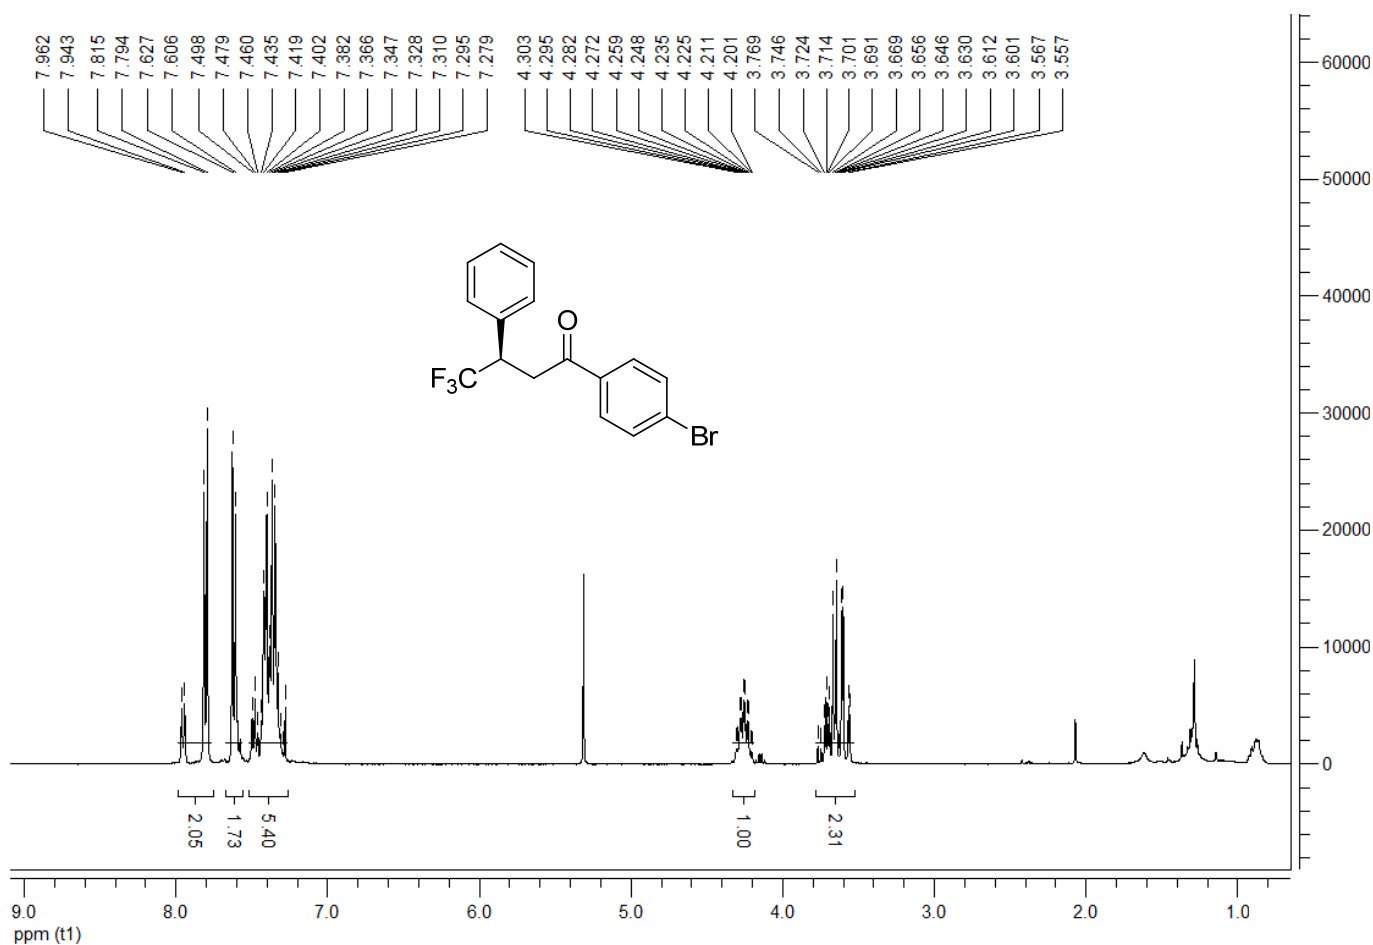

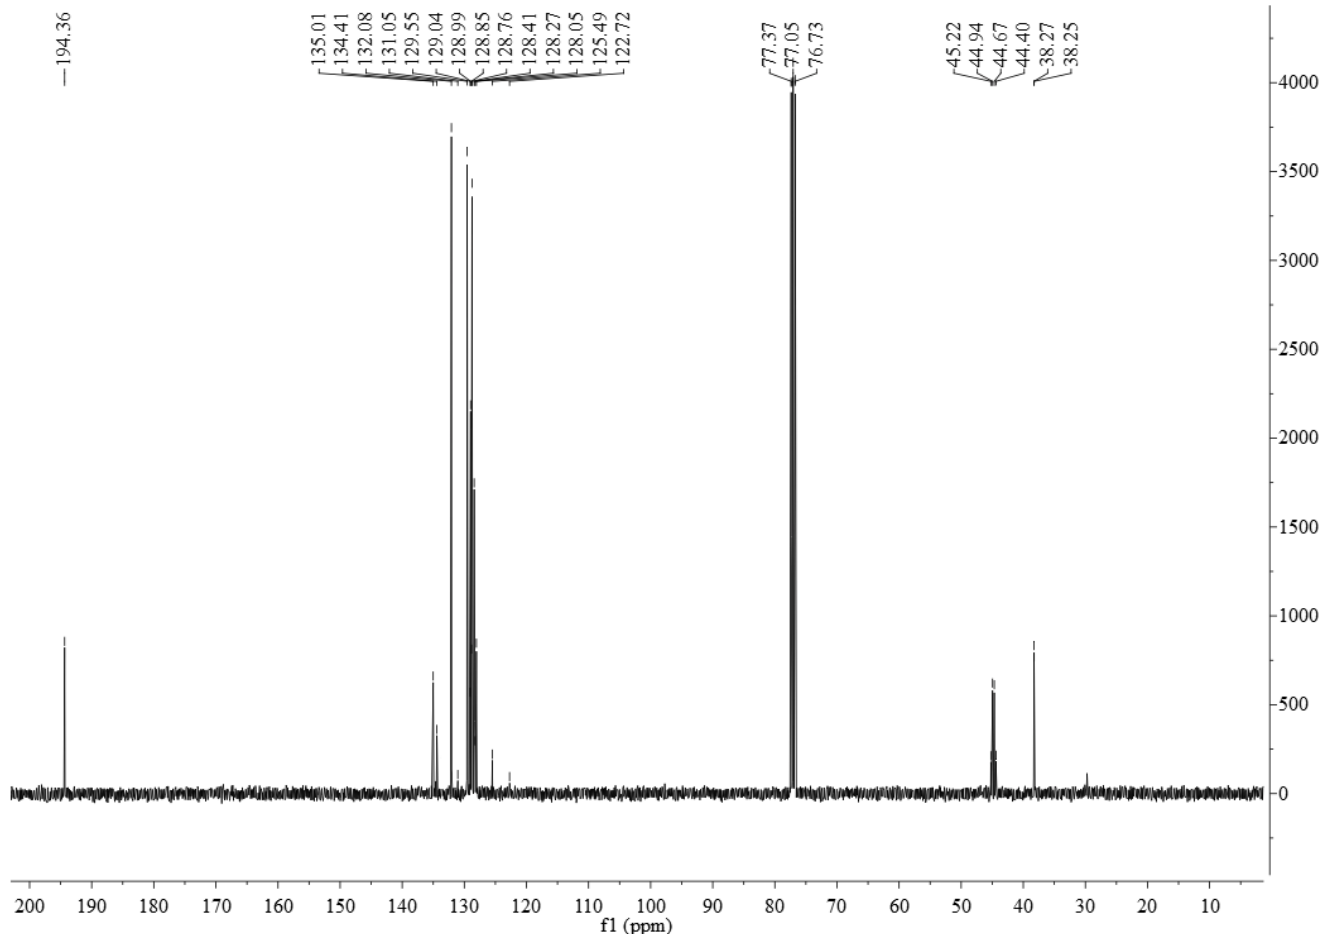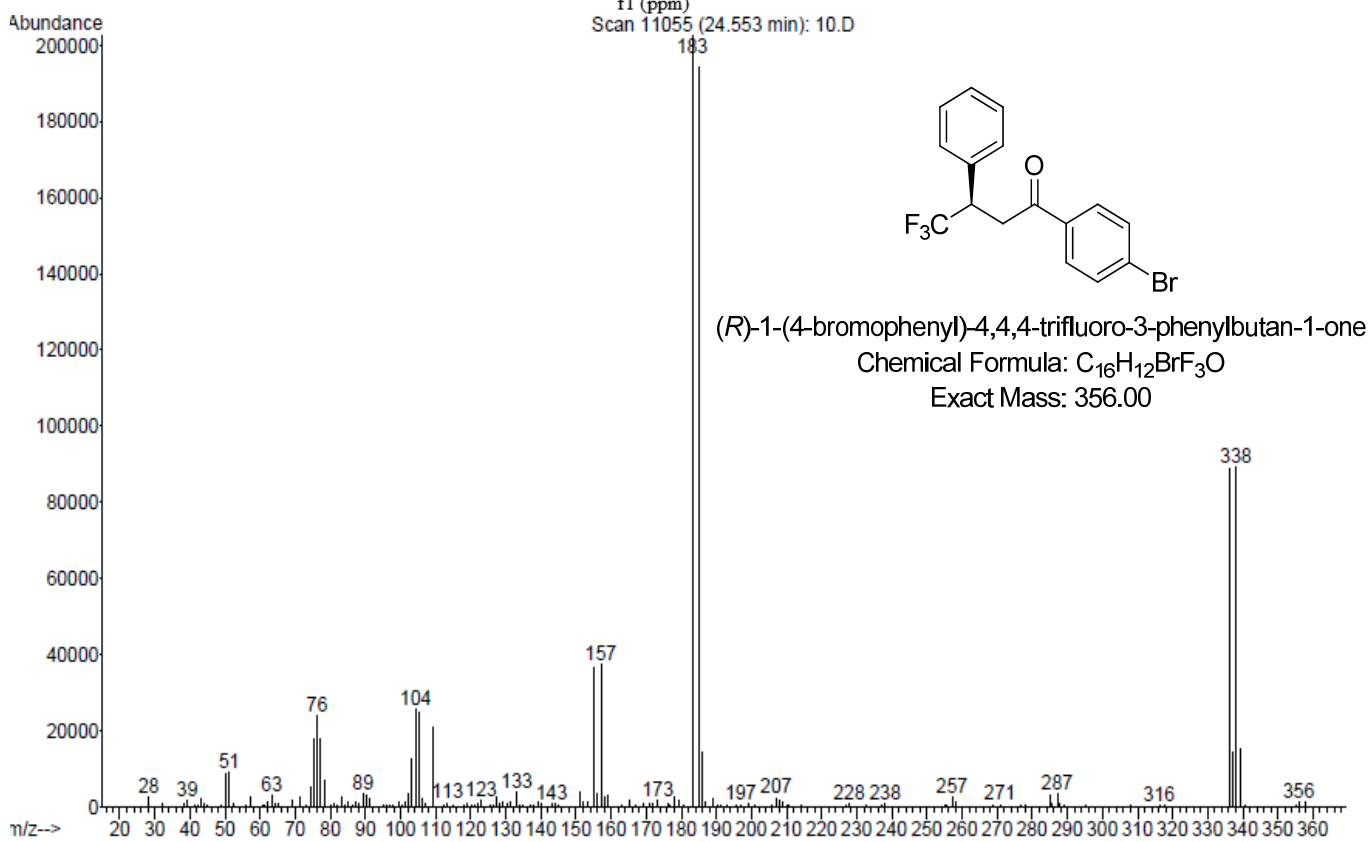



**6l: (R)-4,4,4-Trifluoro-1-(4-methylphenyl)-3-phenyl-1-butanone**

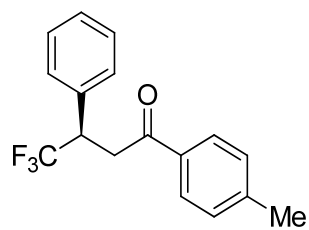

Yield: 95% (90% ee, 95% es);  $^1\text{H}$  NMR (400 MHz,  $\text{CDCl}_3$ ):  $\delta$  2.40, (s, 3H), 3.53-3.60 (m, 1H), 3.68 (ddd,  $J = 1.9, 8.9, 17.8$  Hz, 1H), 4.21-4.28 (m, 1H), 7.24-7.38 (m, 7H), 7.81-7.84 (m, 2H);  $^{13}\text{C}$  NMR (100 MHz,  $\text{CDCl}_3$ ):  $\delta$  21.7, 38.1 (q,  $J = 2$  Hz), 44.8 (q,  $J = 27.7$  Hz), 127.0 (q,  $J = 279.2$  Hz), 128.2, 128.3, 128.7, 129.0, 129.4, 129.8, 133.8, 134.6, 144.5, 194.9; GC/MS ( $m/z$ ): 292.11; HPLC (OD-H, elute:  $n$ -hexanes/ $i$ -PrOH = 95/5, detector: 254 nm, flow rate: 1.0 mL/min, 25  $^\circ\text{C}$ )  $t_1 = 4.8$  min,  $t_2 = 5.5$  min.

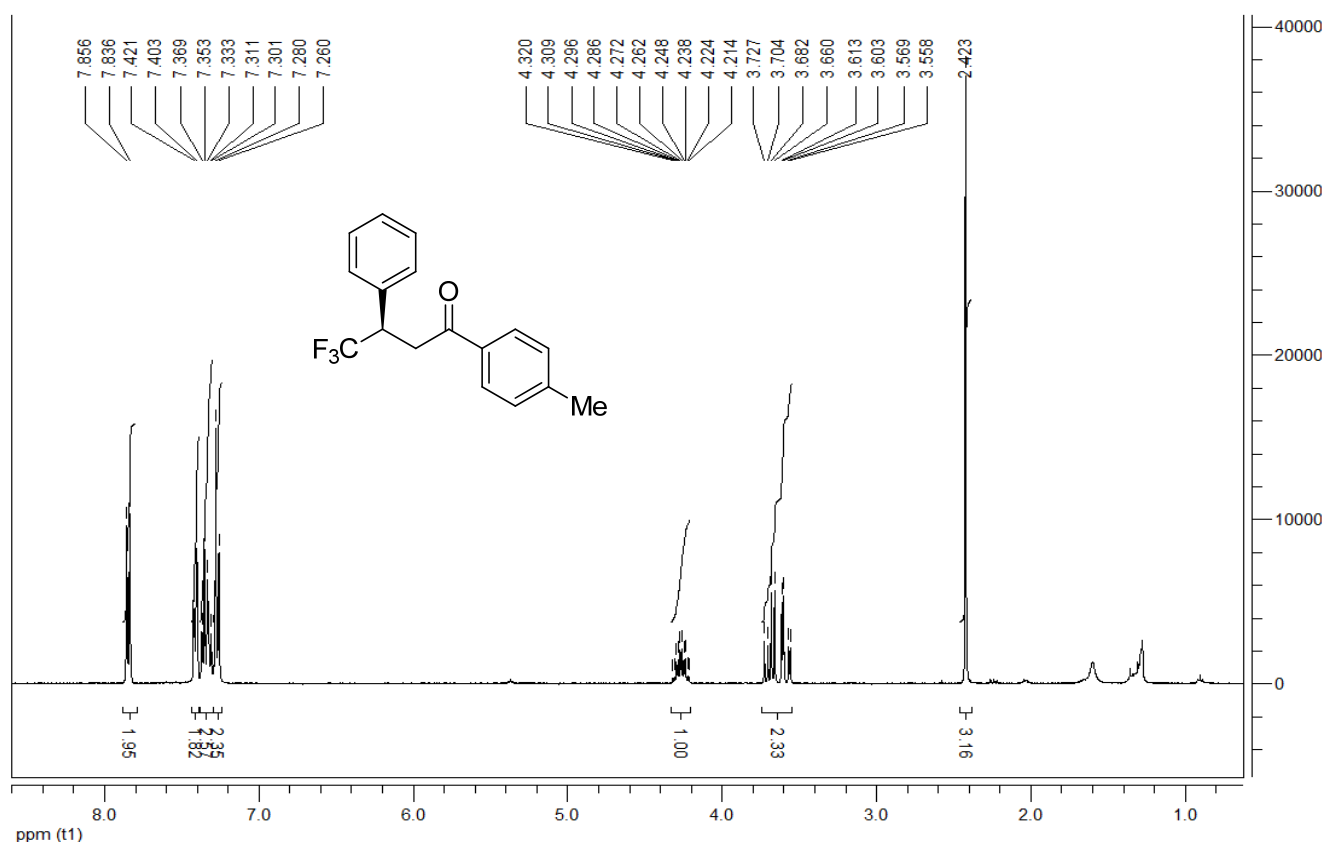

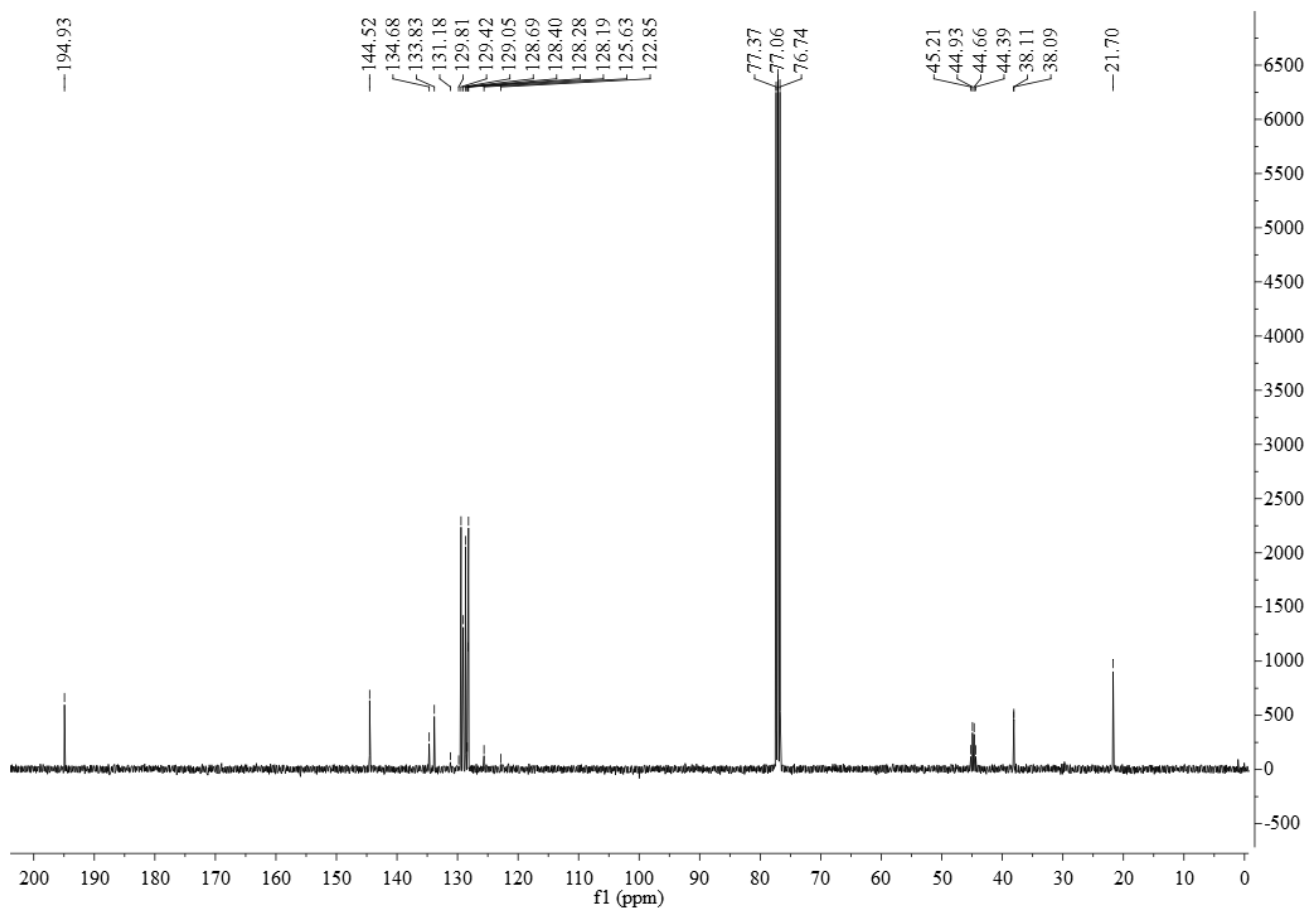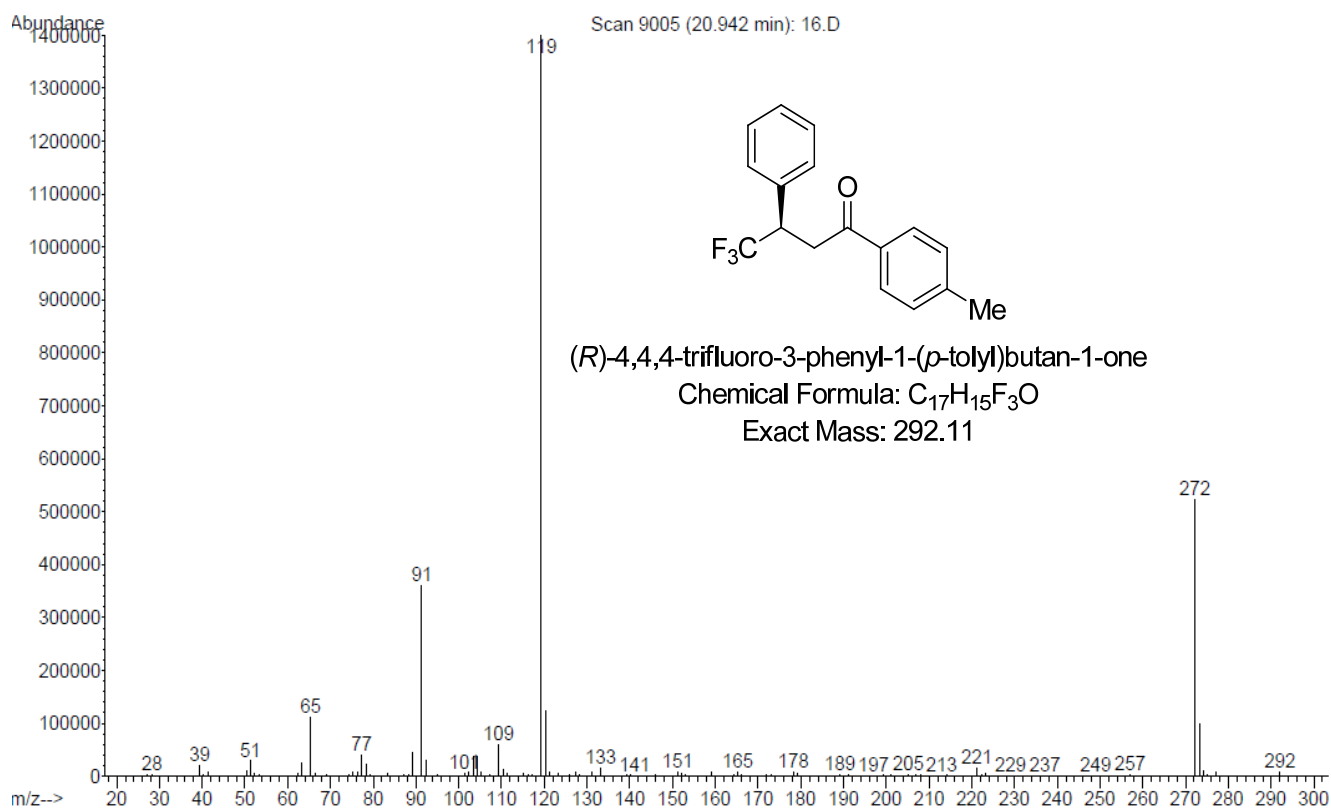

**6m: (R)-4,4,4-Trifluoro-1-(4-methoxyphenyl)-3-phenyl-1-butanone**

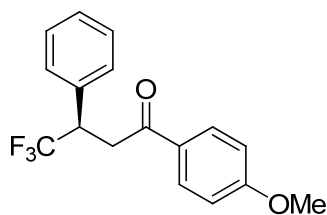

Yield: 92% (90% ee, 100% es);  $^1\text{H}$  NMR (400 MHz,  $\text{CDCl}_3$ ):  $\delta$  3.53 (dd,  $J = 3.9, 17.4$  Hz, 1H), 3.65 (dd,  $J = 9.0, 17.4$  Hz, 1H), 3.85(s, 3H), 4.18-4.31 (m, 1H), 6.92 (d,  $J = 8.4$  Hz, 2H), 7.29-7.40 (m, 5H), 7.91 (d,  $J = 8.7$  Hz, 2H);  $^{13}\text{C}$  NMR (100 MHz,  $\text{CDCl}_3$ ):  $\delta$  38.0 (q,  $J = 1.5$  Hz), 45.1 (q,  $J = 27.7$  Hz), 55.7, 114.0, 127.3 (q,  $J = 278.2$  Hz), 128.4, 128.9, 129.2, 129.6, 130.6, 135.0, 164.0, 194.0; GC/MS (m/z): 308.10; HPLC (OD-H, elute: *n*-hexanes/*i*-PrOH = 95/5, detector: 254 nm, flow rate: 1.0 mL/min, 25 °C)  $t_1 = 8.2$  min,  $t_2 = 10.0$  min.

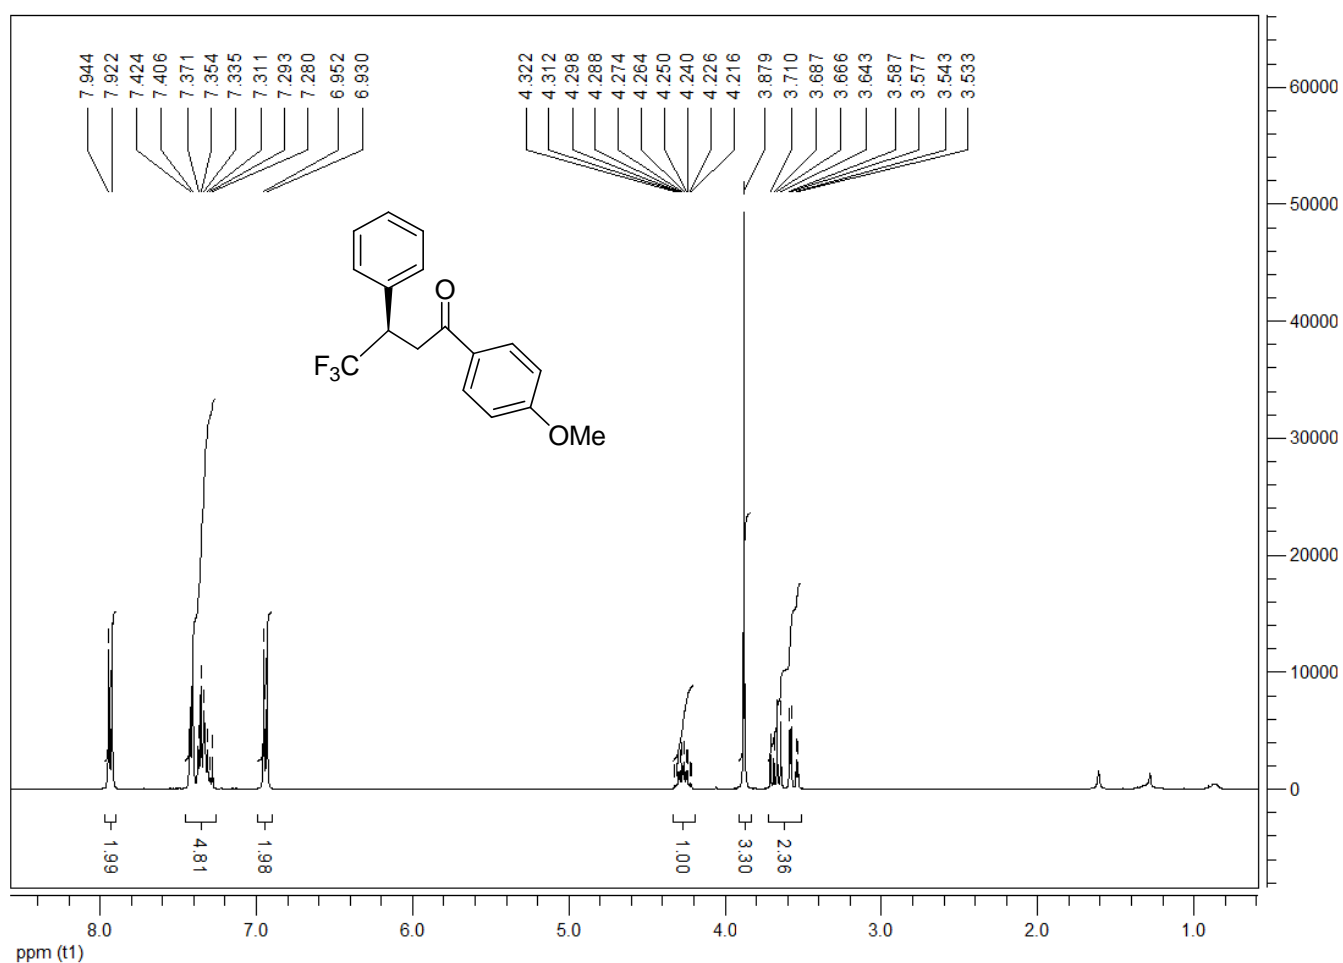

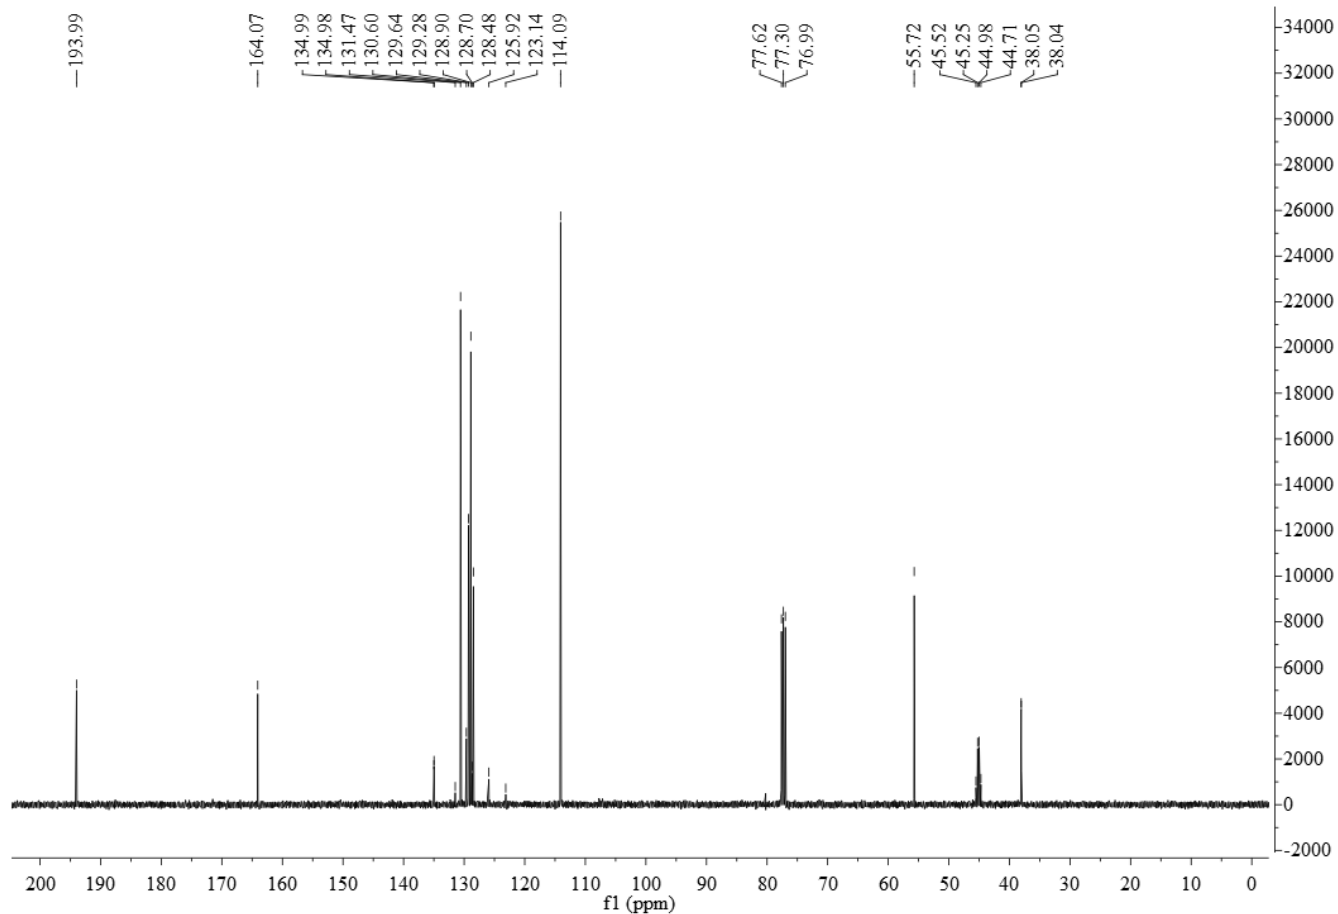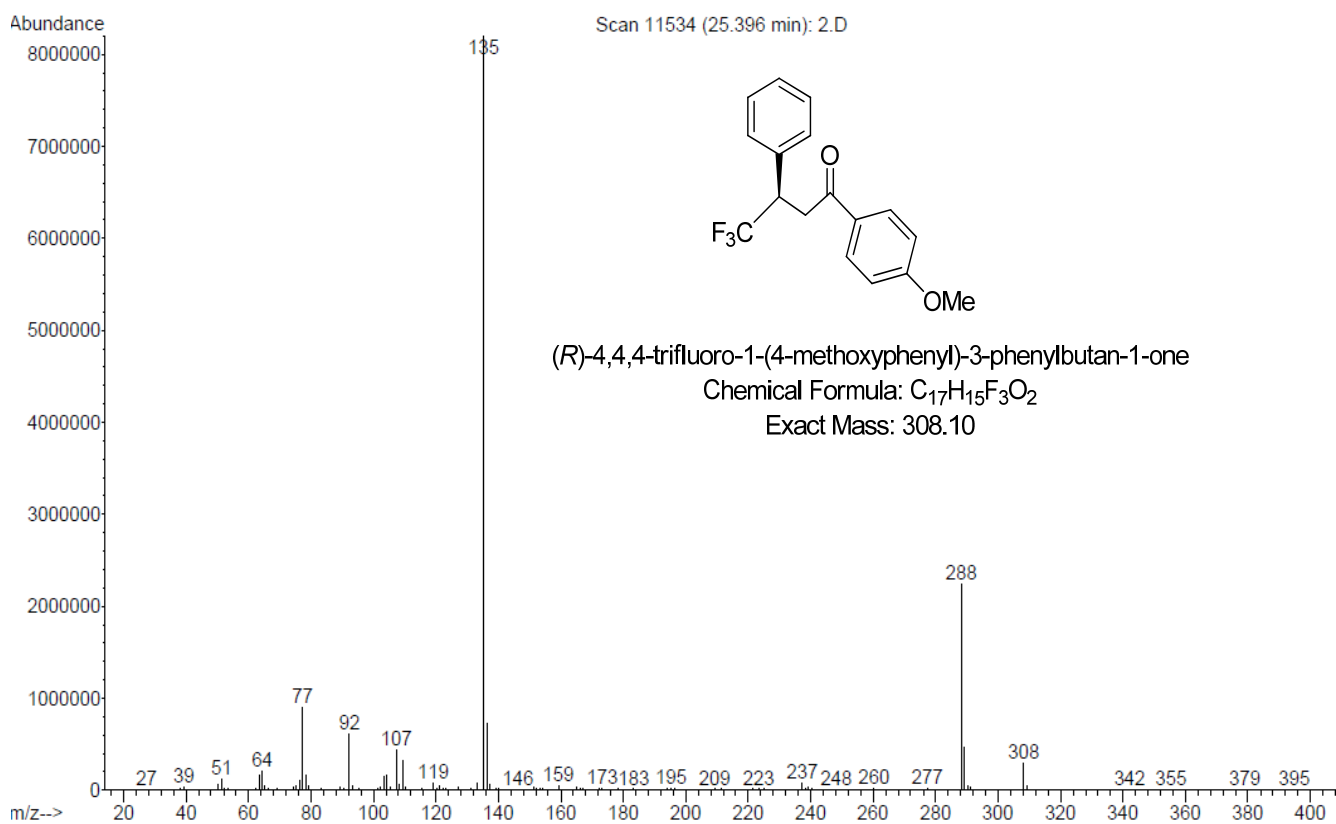

**6n: (R)-1-(3-Chlorophenyl)-4,4,4-trifluoro-3-phenyl-1-butanone**

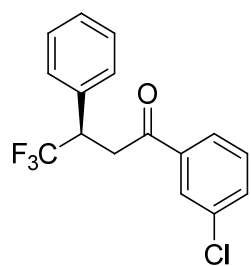

Yield: 95% (93% ee, 99% es);  $^1\text{H}$  NMR (400 MHz,  $\text{CDCl}_3$ ):  $\delta$  3.58 (dd, 1H,  $J = 17.8$  Hz,  $J = 4.4$  Hz), 3.68 (dd, 1H,  $J = 17.8$  Hz,  $J = 8.8$  Hz), 4.21–4.32 (m, 1H), 7.28–7.58 (m, 7H), 7.85 (d, 2H,  $J = 8.6$  Hz);  $^{13}\text{C}$  NMR (100 MHz,  $\text{CDCl}_3$ ):  $\delta$  38.7 (q,  $J = 2$  Hz), 45.0 (q,  $J = 27$  Hz), 126.3, 127.0 (q,  $J = 277.8$  Hz), 128.4, 128.6, 129.2, 130.3, 133.7, 134.6 (q,  $J = 2$  Hz), 135.4, 138.0, 194.3; GC/MS ( $m/z$ ): 312;

HPLC (OD-H, elute: Hexanes/*i*-PrOH = 97/3, detector: 254 nm, flow rate: 1.0 mL/min, 25 °C),  $t_1 = 5.6$  min,  $t_2 = 7.6$  min

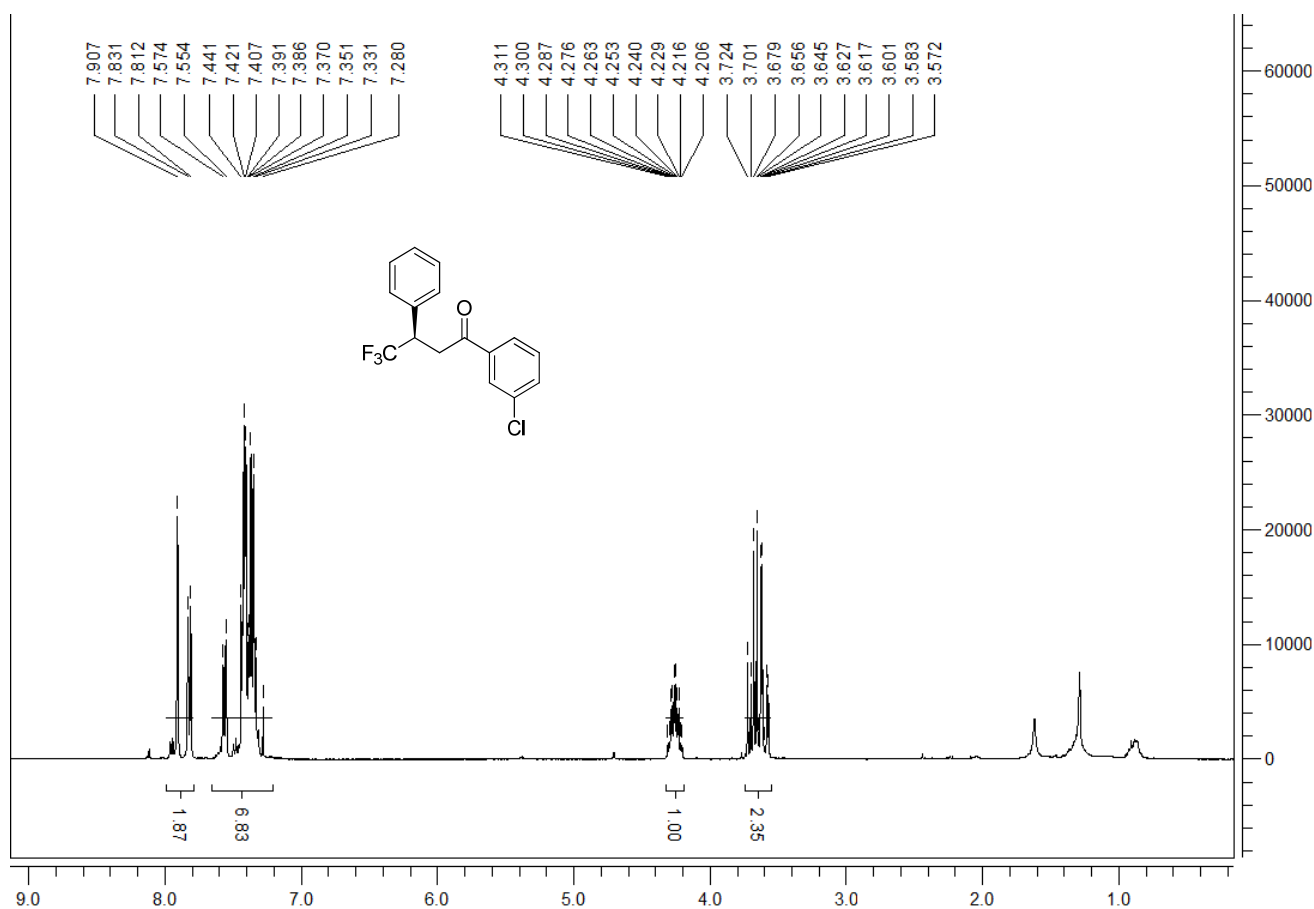

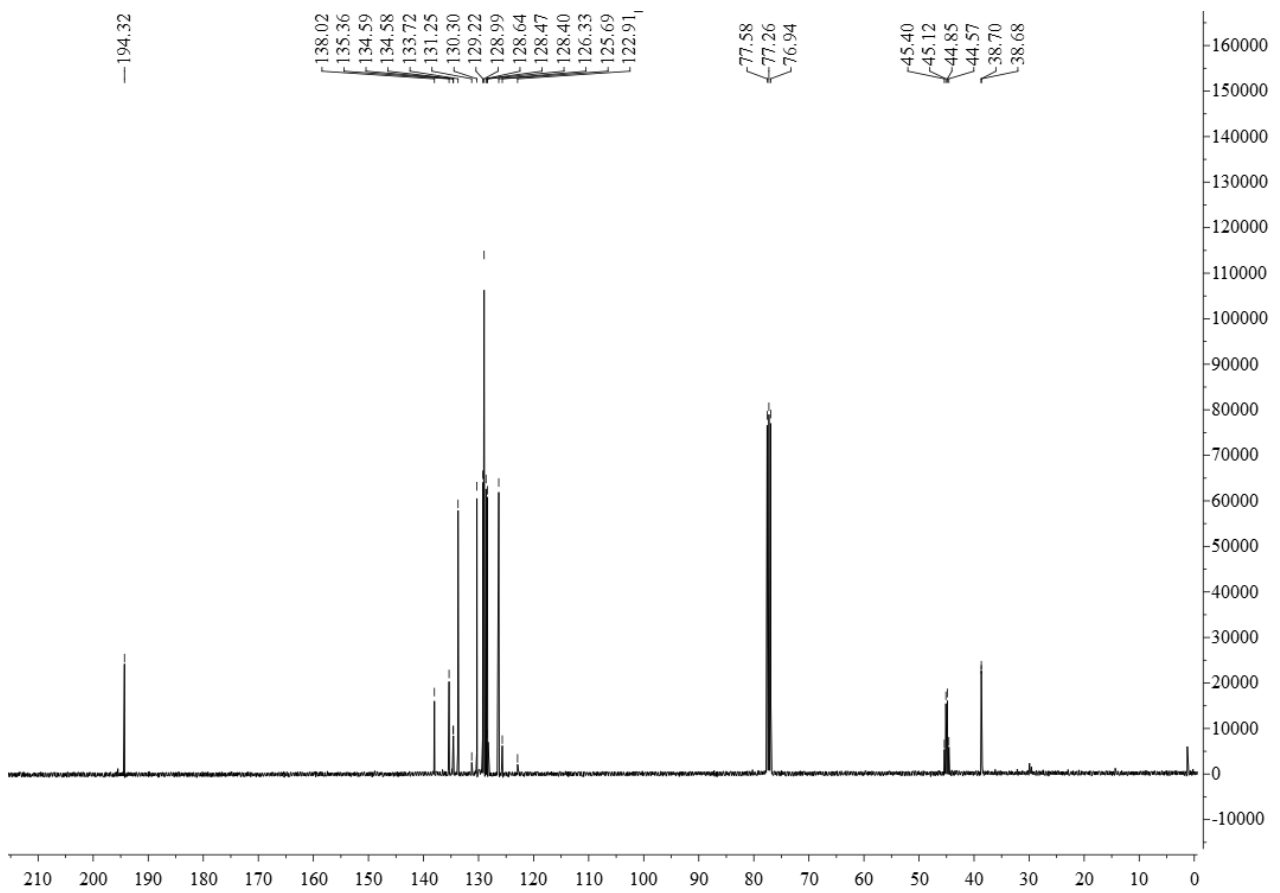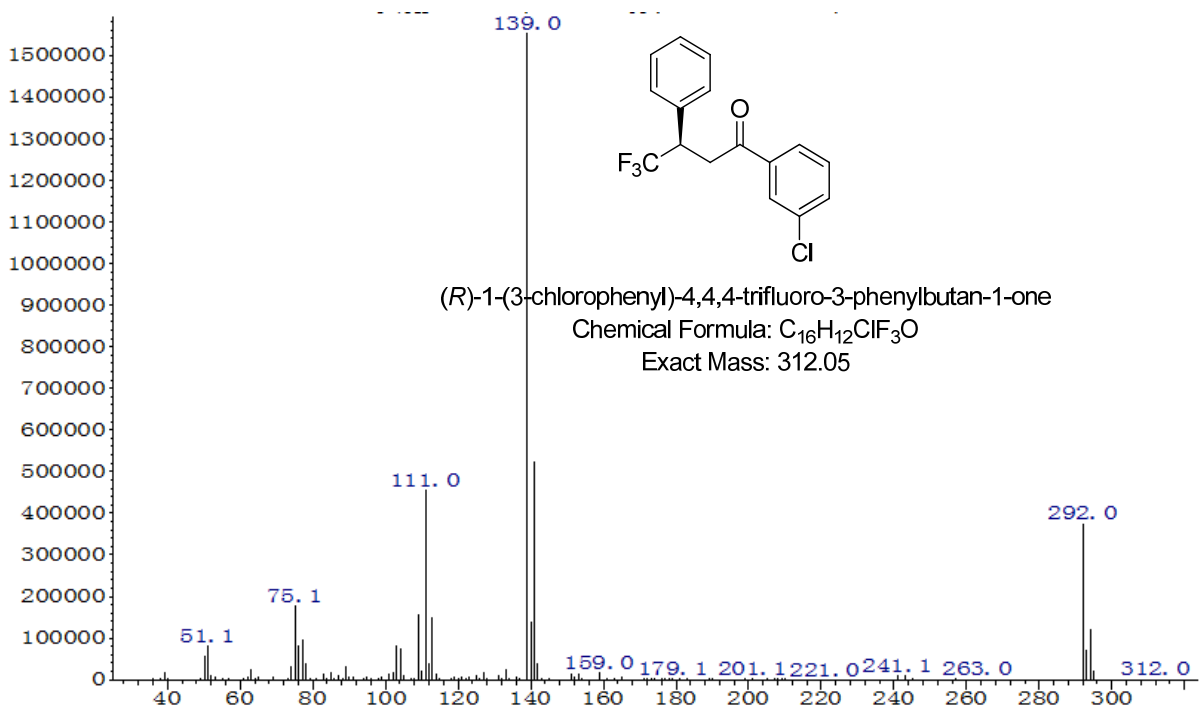

**60: (R)-1-(3-Bromophenyl)-4,4,4-trifluoro-3-phenylbutan-1-one**

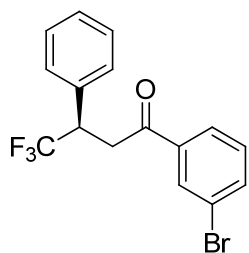

Yield: 96% (93% ee, 100% es);  $^1\text{H}$  NMR (400 MHz,  $\text{CDCl}_3$ ):  $\delta$  3.57 (dd, 1H,  $J = 17.7$  Hz,  $J = 4.4$  Hz), 3.66 (dd, 1H,  $J = 17.7$  Hz,  $J = 8.8$  Hz), 7.27–7.42 (m, 5H), 4.18–4.33 (m, 1H), 7.62 (d, 2H,  $J = 8.5$  Hz), 7.88 (d, 2H,  $J = 8.5$  Hz);  $^{13}\text{C}$  NMR (100MHz,  $\text{CDCl}_3$ ):  $\delta$  38.6 (q,  $J = 2$  Hz), 45.0 (q,  $J = 27$  Hz), 126.7, 127.0 (q,  $J = 277.9$  Hz), 128.6, 128.9, 129.2, 130.5, 133.7, 134.6 (q,  $J = 2$  Hz), 136.6, 138.2,

194.2; GC/MS (m/z): 356; HPLC (OD-H, elute: Hexanes/i-PrOH = 97/3, detector: 254 nm, flow rate: 1.0 mL/min, 25 °C),  $t_1 = 5.6$  min,  $t_2 = 7.6$  min.

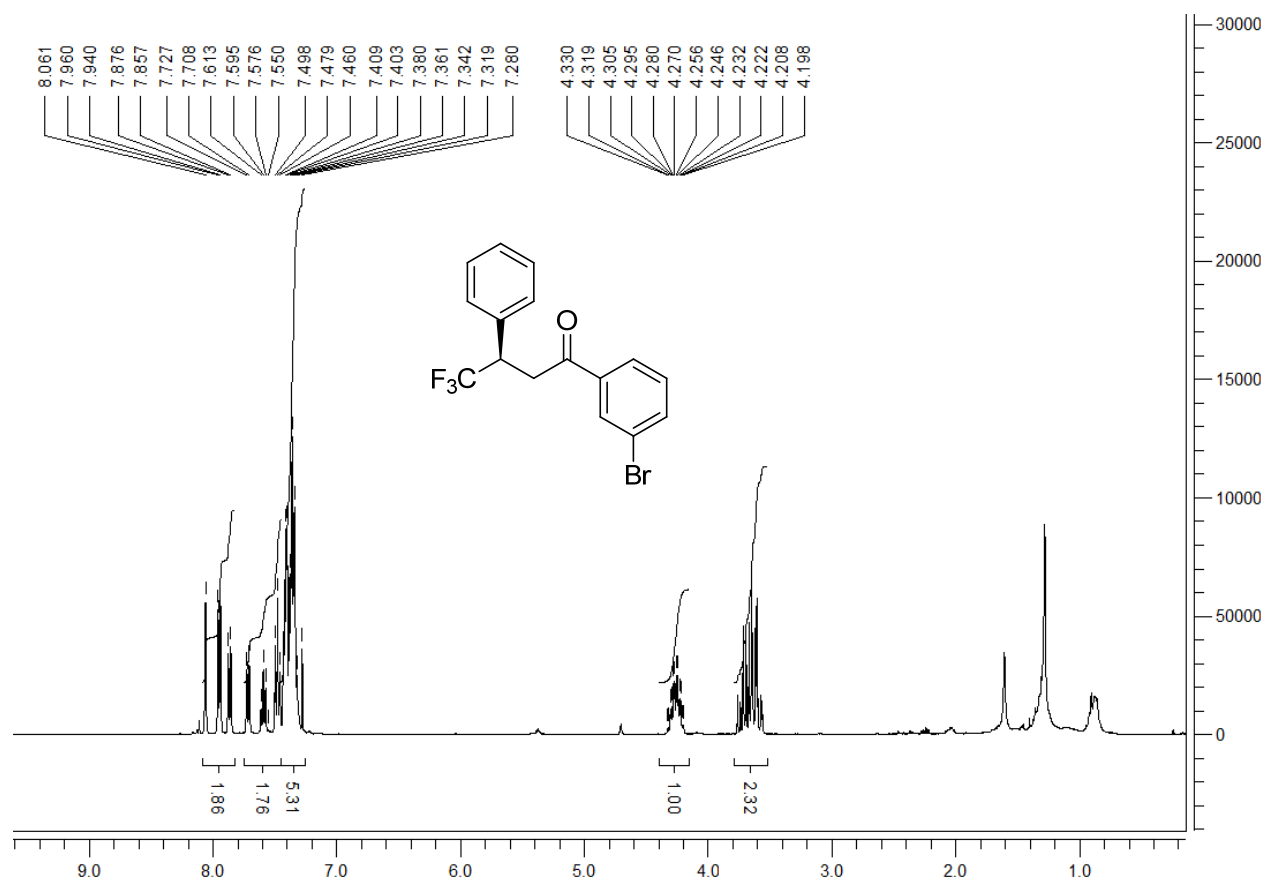

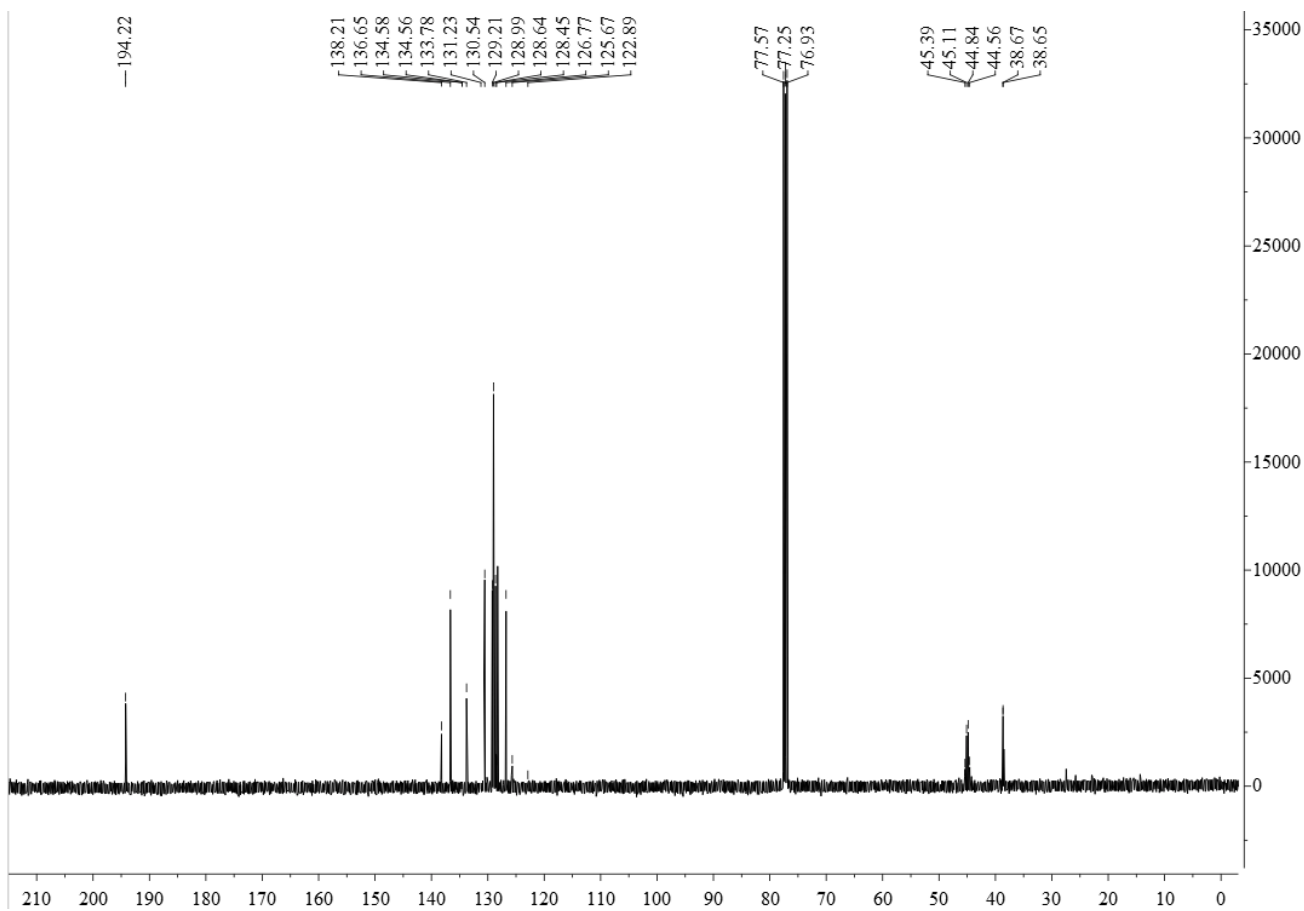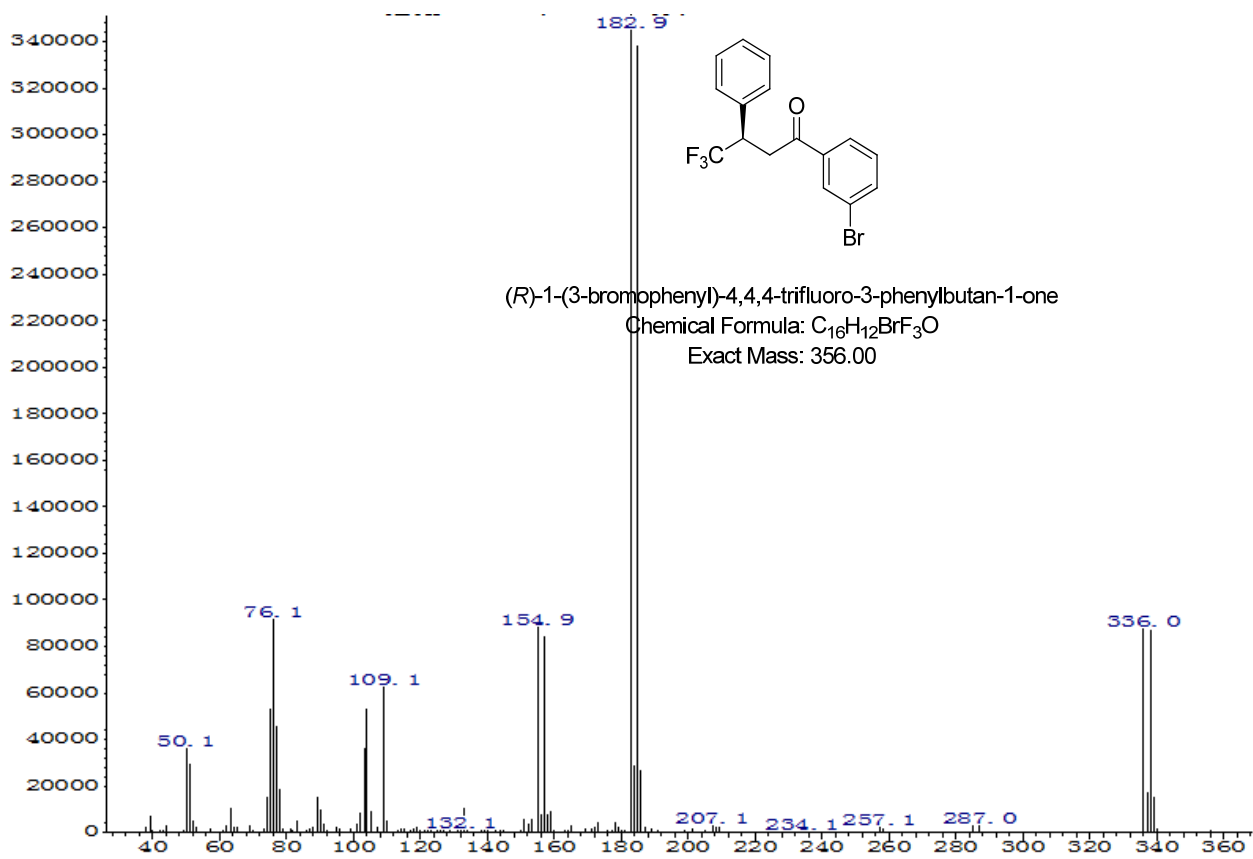



**6p: (R)-4,4,4-Trifluoro-1-(2-methoxyphenyl)-3-phenyl-1-butanone**

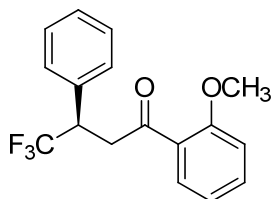

Yield: 95% (92% ee, 100% es);  $^1\text{H}$  NMR (400 MHz,  $\text{CDCl}_3$ ):  $\delta$  3.63 (dd, 1H,  $J = 13.2$  Hz,  $J = 1.0$  Hz), 3.74 (dd, 1H,  $J = 17.9$  Hz,  $J = 3.2$  Hz), 3.95 (s, 3H), 4.16–4.28 (m, 1H), 6.94–7.10 (m, 2H), 7.57–7.61 (m, 1H), 7.28–7.40 (m, 5H), 7.45–7.51 (m, 1H);  $^{13}\text{C}$  NMR (100 MHz,  $\text{CDCl}_3$ ):  $\delta$  43.6 (q,  $J = 2$  Hz), 45.3 (q,  $J = 27$  Hz), 55.7, 111.7, 121.0, 127.2 (q,  $J = 277.9$  Hz), 127.6, 128.3, 128.7, 129.4, 130.8, 134.2, 135.1 (q,  $J = 1.5$  Hz), 158.8, 197.7; GC/MS ( $m/z$ ): 308; HPLC (OD-H, elute: Hexanes/*i*-PrOH = 97/3, detector: 254 nm, flow rate: 1.0 mL/min, 25 °C),  $t_1 = 6.8$  min,  $t_2 = 7.2$  min

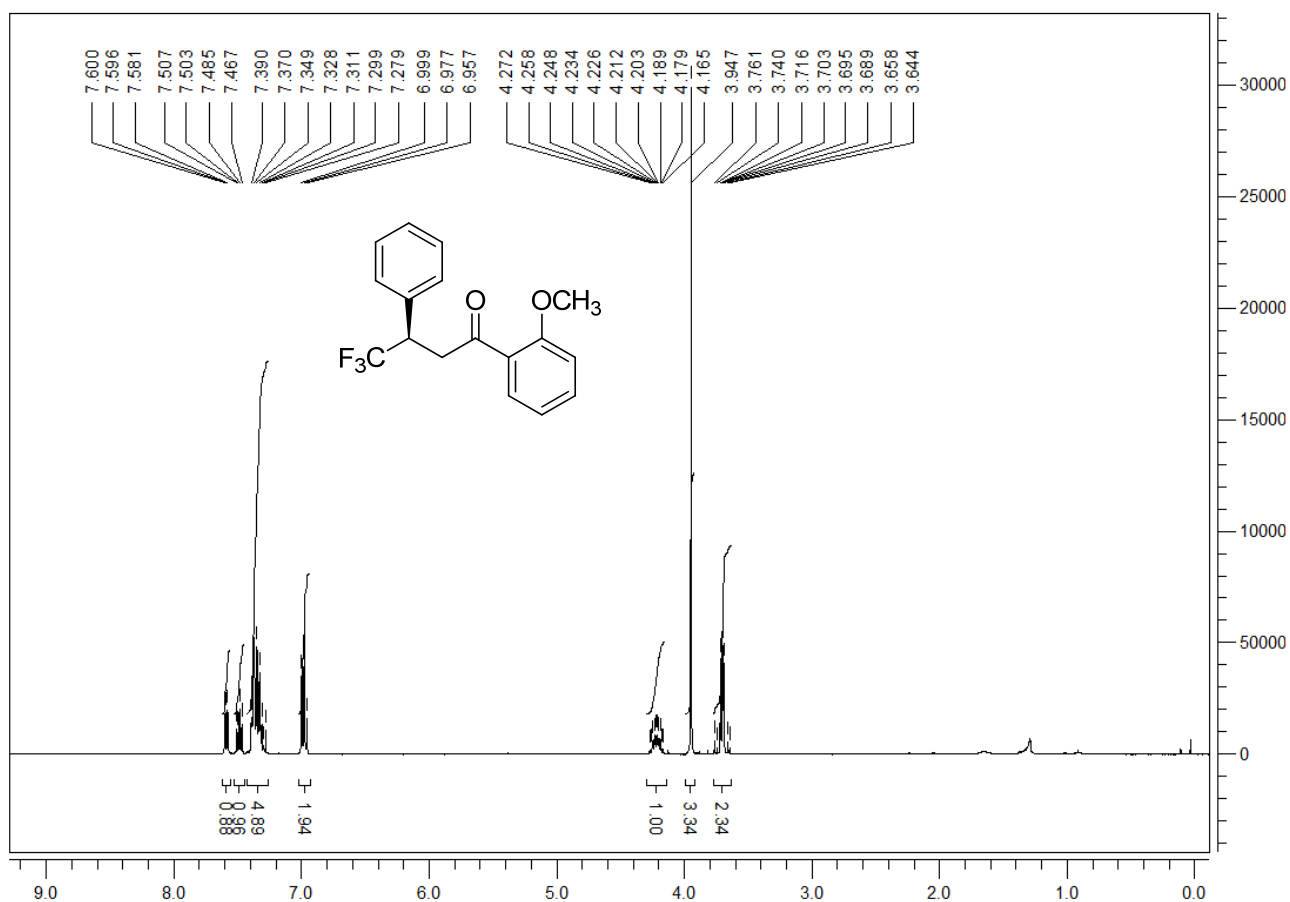

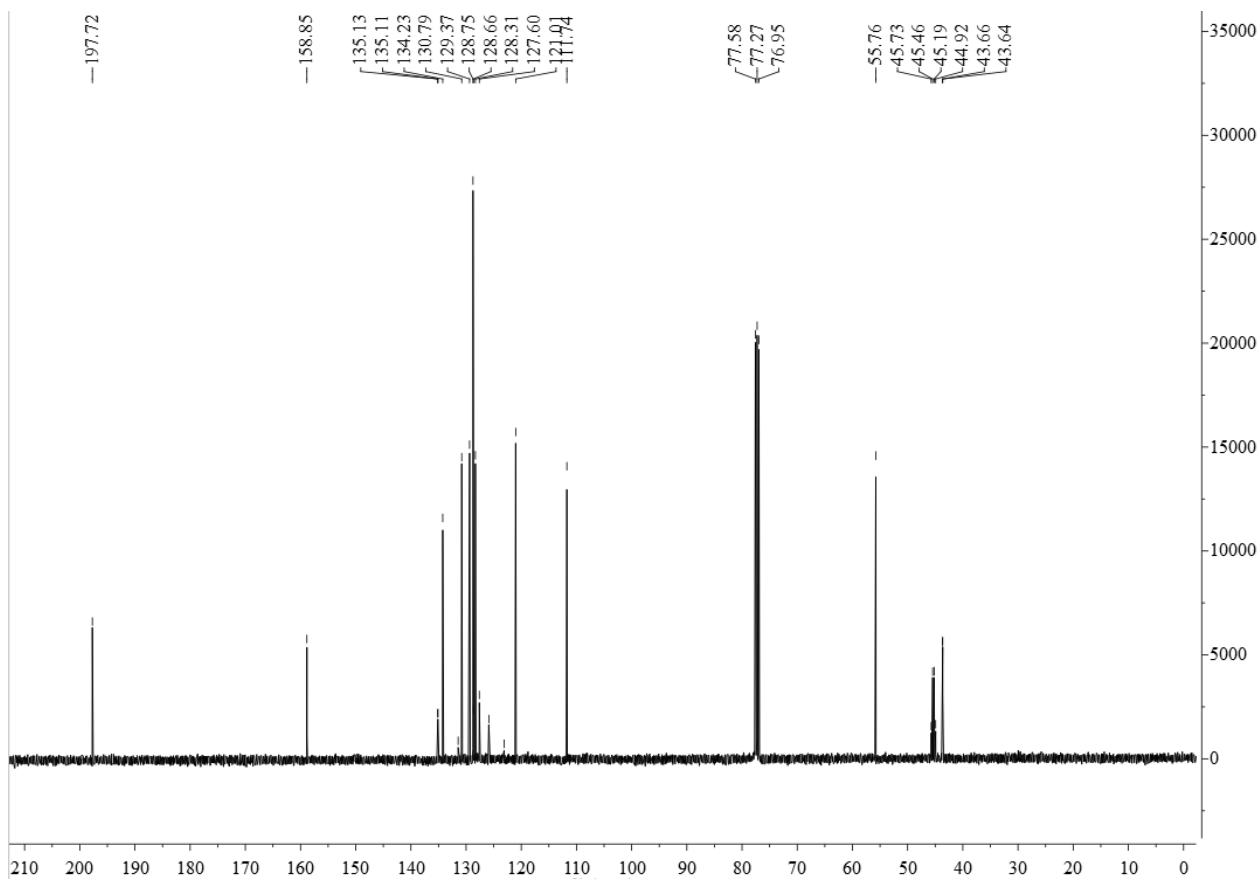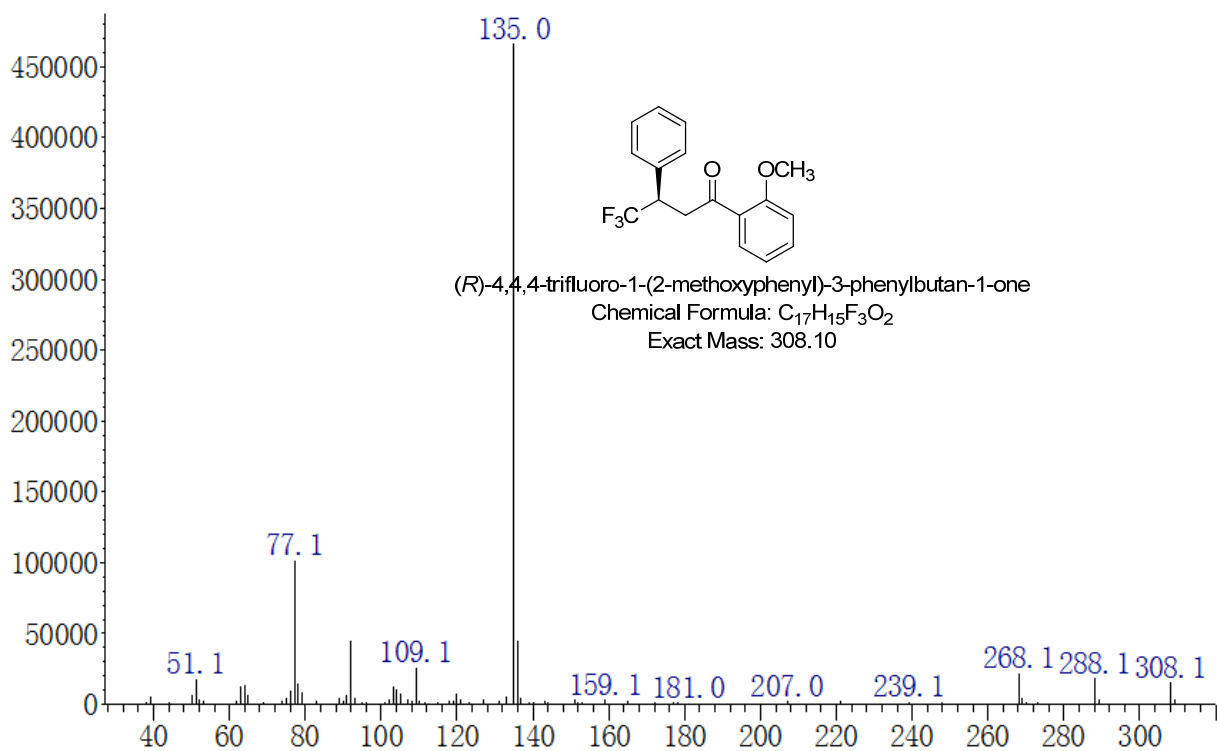

**6q: (R)-1-(4-bromophenyl)-4,4,4-trifluoro-3-(4-fluorophenyl)butan-1-one**

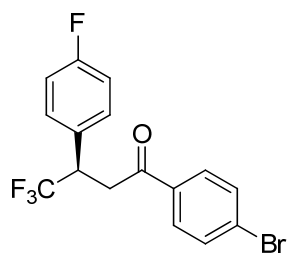

Yield: 95% (91% ee, 100% es);  $^1\text{H}$  NMR (400 MHz,  $\text{CDCl}_3$ ):  $\delta$  3.52–3.67 (m, 2H), 4.21 (dd,  $J = 9.4, 4.4$  Hz, 1H), 7.02–7.07 (m, 2H), 7.28–7.39 (m, 2H), 7.61–7.63 (m, 2H), 7.78–7.81 (m, 2H);  $^{13}\text{C}$  NMR (100 MHz,  $\text{CDCl}_3$ ):  $\delta$  38.3 (q,  $J = 2$  Hz), 44.2 (q,  $J = 28$  Hz), 115.7 (d,  $J = 22$  Hz), 126.7 (q,  $J = 278$  Hz), 129.0, 129.5, 130.6, 130.7, 132.1, 134.9, 162.6 (d,  $J = 246$  Hz), 194.2; GC/MS ( $m/z$ ): 373.99; HPLC (OJ-H, elute: *n*-hexanes/*i*-PrOH = 95/5, detector: 254 nm, flow rate: 1.5 mL/min, 25 °C)  $t_1 = 15.2$  min,  $t_2 = 19.4$  min.

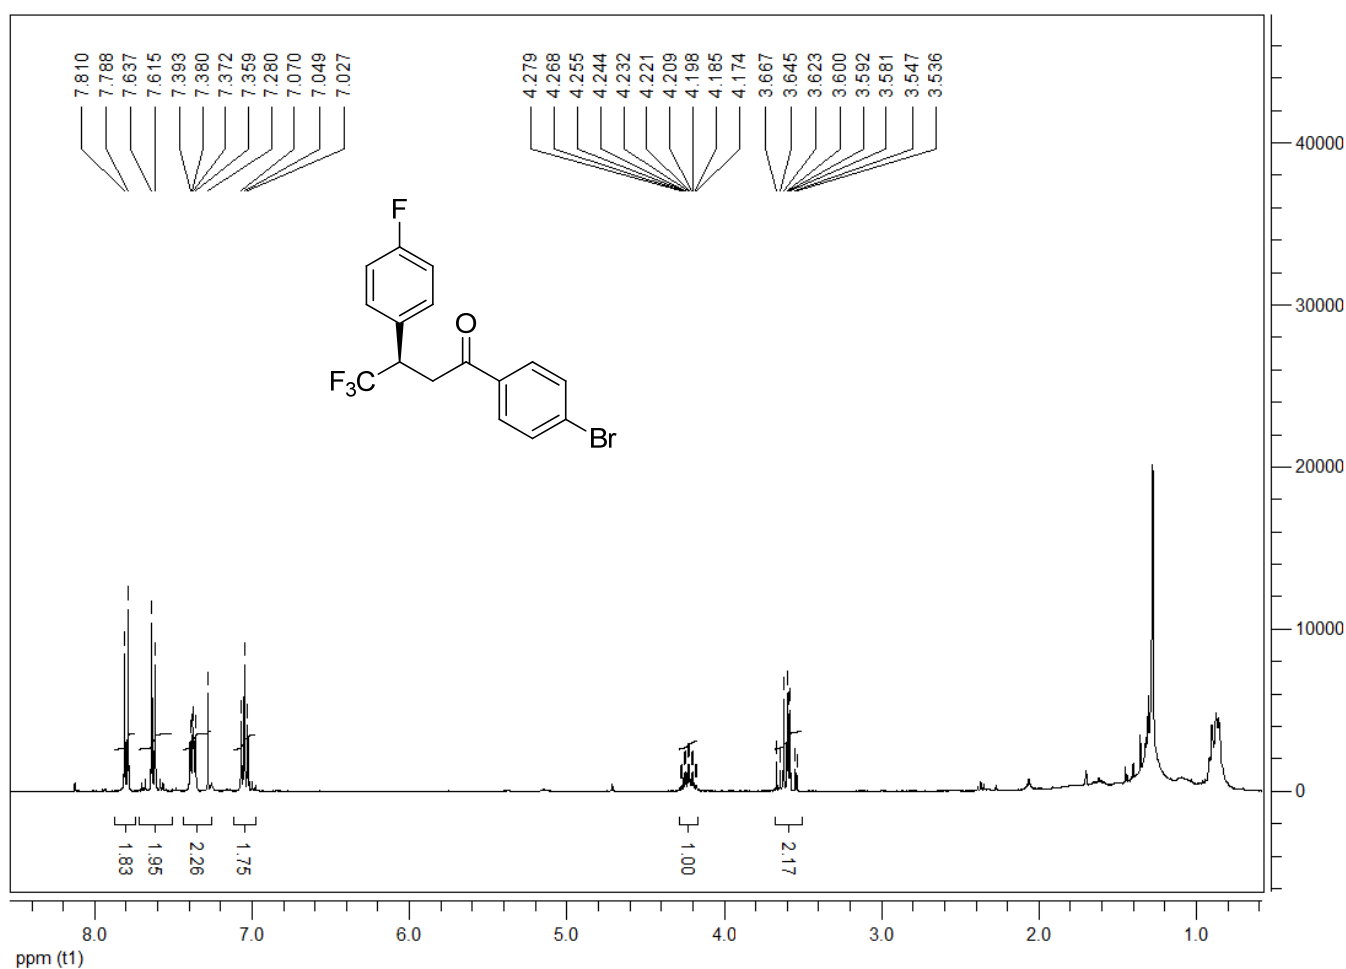

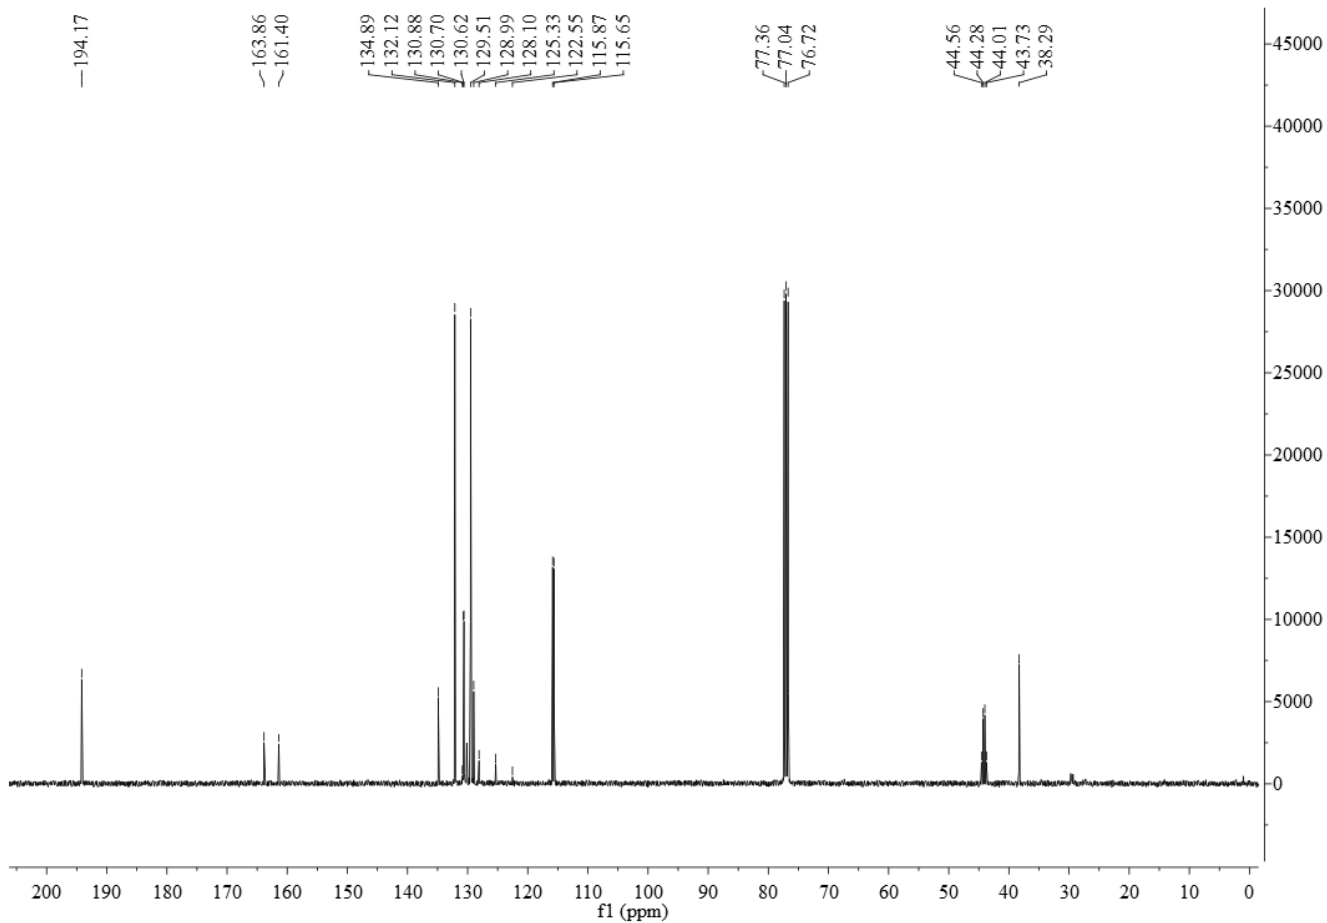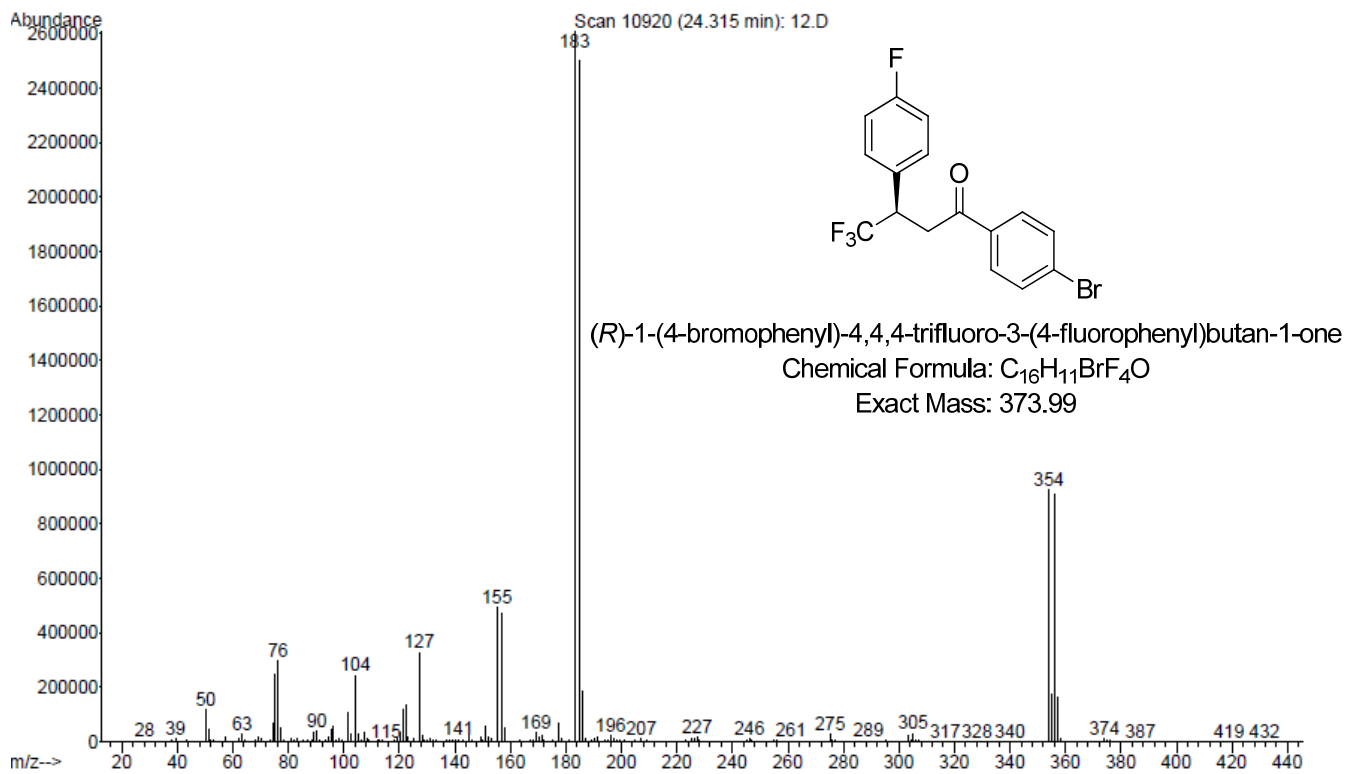

**6r: (R)-4,4,4-Trifluoro-1,3-bis(4-bromophenyl)butan-1-one**

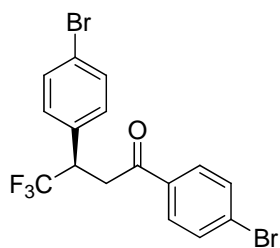

Yield: 94% (90% ee, 97% es);  $^1\text{H}$  NMR (400 MHz,  $\text{CDCl}_3$ ):  $\delta$  3.51–3.65 (m, 2H), 4.18 (dd,  $J = 9.4, 4.4$  Hz, 1H), 7.23–7.29 (m, 2H), 7.44–7.49 (m, 2H), 7.57–7.62 (m, 2H), 7.74–7.79 (m, 2H);  $^{13}\text{C}$  NMR (100 MHz,  $\text{CDCl}_3$ ):  $\delta = 38.1$  (q,  $J = 1.5$  Hz), 44.4 (q,  $J = 27$  Hz), 122.6, 126.5 (q,  $J = 279$  Hz), 129.1, 129.5 (d,  $J = 2$  Hz), 130.6, 131.9, 132.1, 133.4 (d,  $J = 1.7$  Hz), 134.8, 194.0; GC/MS ( $m/z$ ): 433.91; HPLC (OJ-H, elute: *n*-hexanes/*i*-PrOH = 95/5, detector: 254 nm, flow rate: 1.5 mL/min, 25 °C)  $t_1 = 11.9$  min,  $t_2 = 12.9$  min.

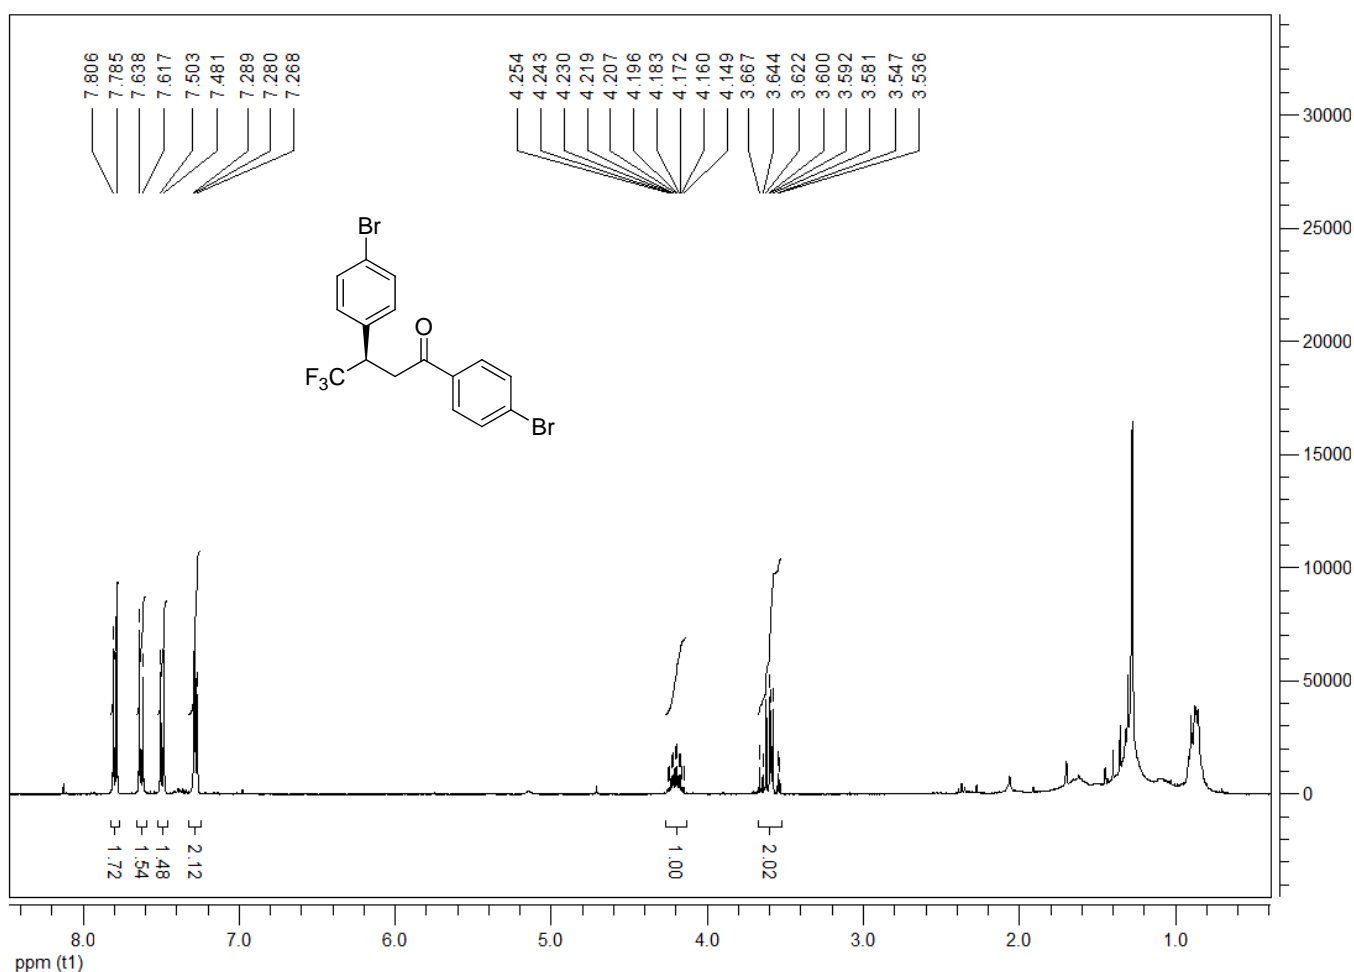

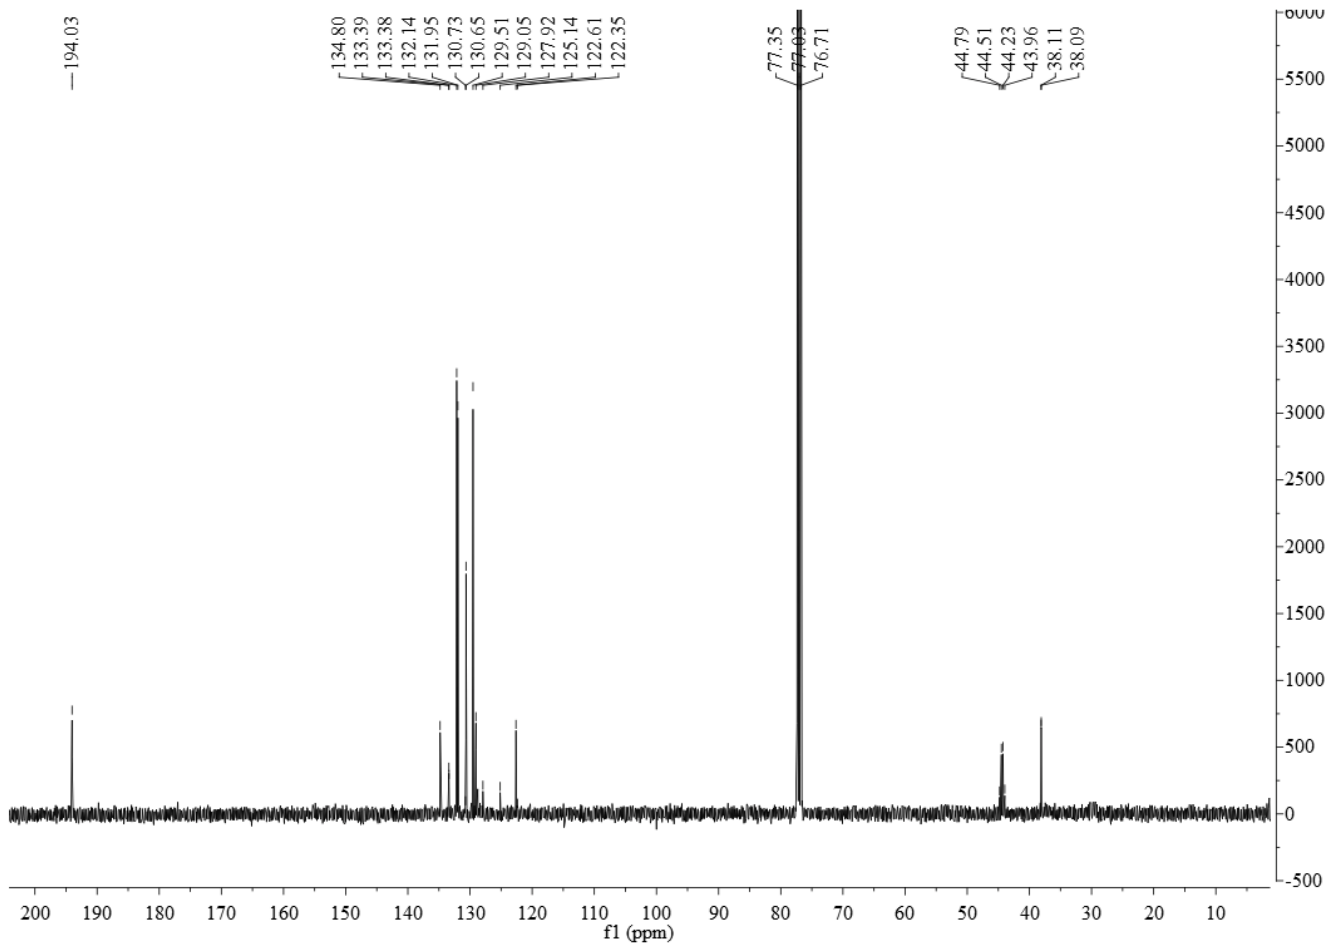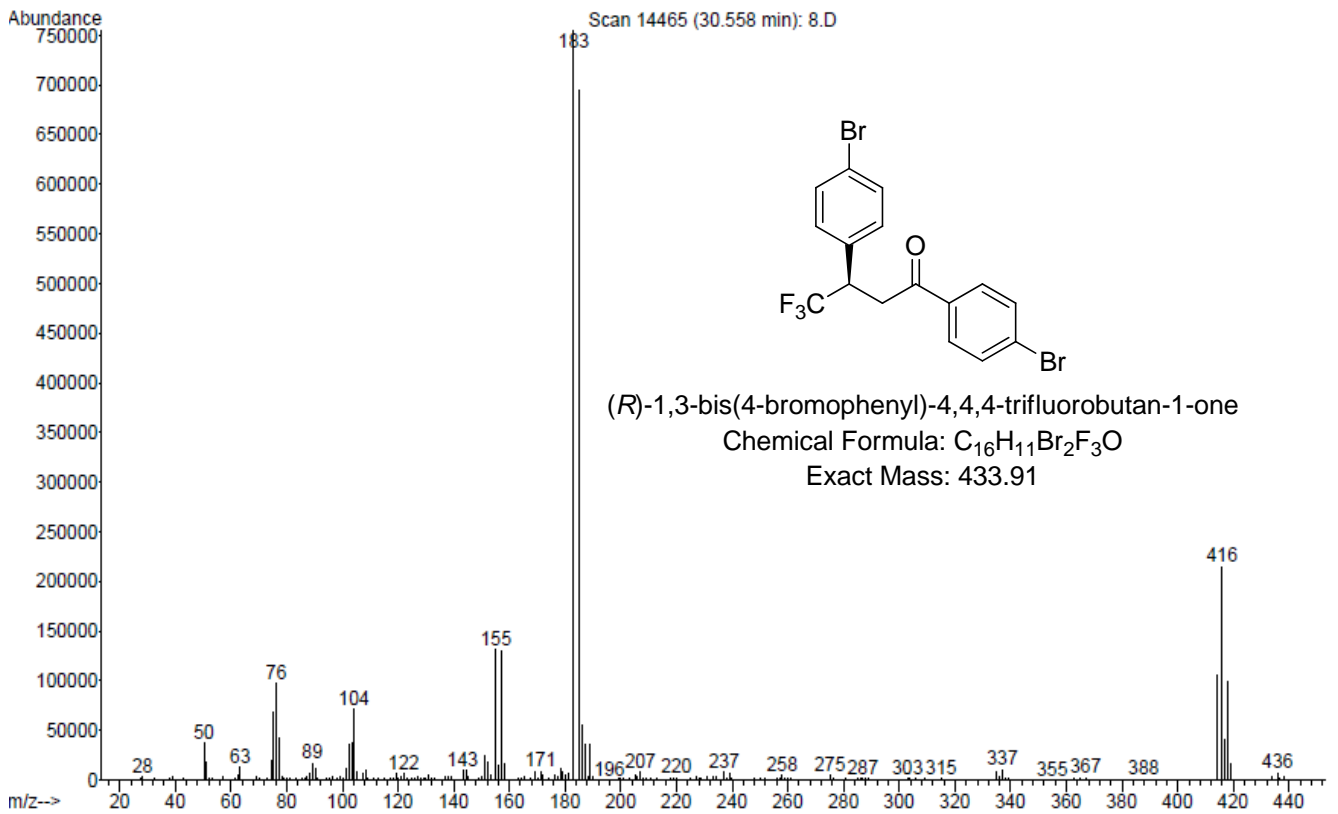

Supplement: c5gc00479a1.pdf [file c5gc00479a1.pdf]
